# Supplementary material for: Large watershed flood forecasting with high resolution distributed hydrological model
Source: Copernicus journal article supplement (doi:10.5194/hess-2016-489), 2016-09-26
Supplement: Supplementary file [file hess-2016-489-AC1-supplement.pdf]

# 1           **Large watershed flood forecasting with high resolution**

## 2                           **distributed hydrological model**

3                   Yangbo Chen<sup>1\*</sup>, Ji Li<sup>1</sup>, Huanyu Wang<sup>1</sup>, Jianming Qin<sup>1</sup>, Liming Dong<sup>1</sup>

4  
5           <sup>1</sup>Department of Water Resources and Environment, Sun Yat-sen University,  
6           Guangzhou 510275, China

7  
8           *Correspondence to:* Yangbo Chen (eescyb@mail.sysu.edu.cn)  
9

10   **Abstract.** Distributed hydrological model has been successfully used in small  
11 watershed flood forecasting, but there are still challenges for the application in large  
12 watershed, one of them is the model's spatial resolution effect. To cope with this  
13 challenge, two efforts could be made, one is to improve the model's computation  
14 efficiency in large watershed, another is implementing the model on high performance  
15 supercomputer. This study sets up a physically based distributed hydrological model  
16 for flood forecasting of Liujiang River Basin in south China. Terrain data DEM, soil  
17 and land use are downloaded from the website freely, and the model structure with a  
18 high resolution of 200m\*200m grid cell is set up. The initial model parameters are  
19 derived from the terrain property data, and then optimized by using the PSO algorithm,  
20 the model is used to simulate 29 observed flood events. It has been found that by  
21 dividing the river channels into virtual channel sections and assuming the cross  
22 section shapes as trapezoid, the Liuxihe Model largely increases computation  
23 efficiency while keeping good model performance, thus making it applicable in larger  
24 watersheds. This study also finds that parameter uncertainty exists for physically  
25 deriving model parameters, and parameter optimization could reduce this uncertainty,  
26 and is highly recommended. Computation time needed for running a distributed  
27 hydrological model increases exponentially at a power of 2, not linearly with the  
28 increasing of model spatial resolution, and the 200m\*200m model resolution is  
29 proposed for modeling Liujiang River Basin flood with Liuxihe Model in this study.  
30 To keep the model with an acceptable performance, minimum model spatial

31 resolution is needed. The suggested threshold model spatial resolution for modeling  
32 Liujiang River Basin flood is 500m\*500m grid cell, but the model spatial resolution at  
33 200m\*200m grid cell is recommended in this study to keep the model a better  
34 performance.

35 **Key words:** watershed flood forecasting, distributed hydrological model, Liuxihe  
36 Model, parameter optimization, model spatial resolution

37

## 38 **1 Introduction**

39 Flooding is one of the most devastating natural disasters in the world, and huge  
40 damages has been caused ([Krzmm, 1992](#), [Kuniyoshi, 1992](#), [Chen, 1995](#), [EEA, 2010](#)).

41 Flood forecasting is one of the most widely used flood mitigation measurements, and  
42 watershed hydrological model is the major tool for flood forecasting. Currently the  
43 most popular hydrological model for watershed flood forecasting is still the so-called  
44 lumped model ([Refsgaard et. al., 1996](#)), which averages the terrain property and  
45 precipitation over the watershed, so do the model parameters. Hundreds of lumped  
46 models have been proposed and widely used, such as the Sacramento model proposed  
47 by Burnash et. al. ([1995](#)), the Tank model proposed by Sugawara et. al. ([1995](#)), the  
48 Xinanjiang model proposed by Zhao ([1977](#)), and the ARNO model proposed by  
49 Todini ([1996](#)), only naming a few among others. It is widely accepted that the  
50 precipitation for driving the watershed hydrological processes is usually unevenly  
51 distributed over the watershed, particularly for the large watershed, so the lumped  
52 model could not easily forecast the watershed flooding of large watersheds.  
53 Furthermore, due to the inhomogeneity of terrain property over the watershed, which  
54 is true even in very small watershed, so the watershed flood forecasting could not be  
55 forecasted accurately if the model parameters are averaged over the watershed. For  
56 this reasons, new models are needed to improve the watershed flood forecasting  
57 capability, particularly for large watershed flood forecasting.

58

59 Development of distributed hydrological model in the past decades provides the  
60 potential to improve watershed flood forecasting capability. One of the most  
61 important features of the distributed hydrological model is that it divides watershed  
62 terrain into grid cells, which are regarded to have the same meaning of a real  
63 watershed, i.e., the grid cells have their own terrain properties and precipitation. The  
64 hydrological processes are calculated at both the grid cell scale and the watershed  
65 scale, and the parameters used to calculate hydrological processes are also different at  
66 different grid cells. This feature makes it could describe the inhomogeneity of both  
67 the terrain property and precipitation over watershed. The distributed feature of the  
68 distributed hydrological model is a very important feature compared to lumped model,  
69 which makes it could better simulate the watershed hydrological processes at all scale,  
70 small or large. The inhomogeneity of precipitation over watershed could also be well  
71 described in the model, this is very helpful in modeling large watershed hydrological  
72 processes, particularly in the tropical and sub-tropical regions where the flooding is  
73 driven by heavy storm. For this reason, distributed hydrological model is usually  
74 regarded to have the potential to better simulate or forecast the watershed flood  
75 (Ambroise et. al., 1996, Chen et. al., 2016). Employing distributed hydrological  
76 model for watershed food forecasting has been a new trend(Vieux et. al., 2004, Chen  
77 et. al., 2012, Céline Cattoën et. al., 2016, Witold et. al., 2016, Kauffeldt et. al., 2016).

78

79 The blueprint of distributed hydrological model is regarded to be proposed by Freeze  
80 and Harlan (1969), the first distributed hydrological model was the SHE model  
81 proposed by Abbott et. al. (1986a, 1986b). Distributed hydrological model requires  
82 different terrain property data for every grid cells to set up the model structure, so it is  
83 data driven model. In the early stage of distributed hydrological modeling, this posted  
84 great challenge for distributed hydrological model's application as the data was not  
85 widely available and inexpensively accessible. With the development of remote  
86 sensing sensors and techniques, terrain data covering global range with high  
87 resolution has got readily available and could be acquired inexpensively. For example,

88 the DEM at 30m grid cell resolution with global coverage could be freely downloaded  
89 (Falorni et al., 2005, Sharma et. al., 2014), which largely pushes forward the  
90 development and application of the distributed hydrological models. After that, many  
91 distributed hydrological models have been proposed, such as the WATERFLOOD  
92 model (Kouwen, 1988), THALES model (Grayson et al., 1992), VIC model (Liang et.  
93 al., 1994), DHSVM model (Wigmosta et. al., 1994), CASC2D model (Julien et. al.,  
94 1995), WetSpa model (Wang et. al., 1997), GBHM model (Yang et. al., 1997), WEP-L  
95 model (Jia et. al., 2001), Vflo model (Vieux et. al., 2002), tRIBS model(Vivoni et. al.,  
96 2004), WEHY model (Kavvas et al., 2004), Liuxihe model (Chen et. al., 2011, 2016),  
97 and more.

98

99 Distributed hydrological model derives model parameters physically from the terrain  
100 property data, and is regarded not need to calibrate model parameter, so it could be  
101 used in data poor or ungauged basins. This feature of distributed hydrological model  
102 made it applied widely in evaluating the impacts of climate changes and urbanization  
103 on hydrology(Li et. al., 2009, Seth et. al., 2001, Ott, et. al., 2004, Vanrheenen et. al.,  
104 2005, Olivera et. al., 2007). But it also was found that this feature caused parameter  
105 uncertainty due to the lack of experiences and references in physically deriving model  
106 parameters from the terrain property, so could not be used in fields that require high  
107 flood simulated accuracy, including watershed flood forecasting. It was realized that  
108 parameter optimization for distributed hydrological model is also needed to improve  
109 the model's performance, and a few methods for optimizing parameters of distributed  
110 hydrological model have been proposed. For example, Vieux et. al. (2003) tried a  
111 so-called scalar method to adjust the model parameters, and the model performance is  
112 found to be improved largely. Madsen et. al. (2003) proposed an automatic  
113 multi-objective parameter optimization method with SCE algorithm for SHE model,  
114 which improved the model performance also. Shafii et. al. (2009) proposed a  
115 multi-objective genetic algorithm for optimizing parameters of WetSpa model, the  
116 improved model result is regarded to be reasonable. Xu et. al. (2012) proposed an

117 automated parameter optimization method with SCE-UA algorithm for Liuxihe Model,  
118 which improved the model performance in a small watershed flood forecasting. Chen  
119 et. al. (2016) proposed an automated parameter optimization method based on PSO  
120 algorithm for Liuxihe Model watershed flood forecasting, and tested in two watershed,  
121 one is small, one is large. The results suggested that distributed hydrological model  
122 should optimize model parameters even if there is only little available hydrological  
123 data, while the derived model parameters physically from the terrain property could  
124 serve as an initial parameters. The above progresses in distributed hydrological  
125 model's parameter optimization has matured, and will largely improve the  
126 performance of distributed hydrological model, thus pushing forward the application  
127 of distributed hydrological model in real-time watershed flood forecasting.

128

129 Spatial resolution is a key factor in distributed hydrological modeling. Theoretically if  
130 the spatial resolution of a distributed hydrological model is higher, i.e., the grid cell  
131 size is smaller, the terrain property could be described finer, and the hydrological  
132 processes could be better simulated or forecasted, so the model spatial resolution  
133 should be as high as possible. But on the other hand, higher model spatial resolution  
134 requires higher resolution terrain property data for model setting up which may not be  
135 available in some watersheds. But the most important is that distributed hydrological  
136 model uses complex equations with physical meanings to calculate the hydrological  
137 processes, so it needs much more computation resources than that of lumped model,  
138 and the required computation resources increases exponentially with the increasing of  
139 the model spatial resolution. So in modeling flood processes of a large watershed, the  
140 computation time needed for running the distributed hydrological model will be huge  
141 if the model spatial resolution is kept high, which may make the model application  
142 impractical due to high running cost. So if distributed hydrological model is needed to  
143 be applied in large watershed, a coarser resolution is the only choose, and the model's  
144 capability will be impacted with less satisfactory results. This is also called the scaling  
145 effect of distributed hydrological modeling. For this reason, current application for

146 watershed flood forecasting either limited to small watershed with higher resolution  
147 or coarser resolution in large watershed, i.e., a trade-off between the model  
148 performance and running cost.

149

150 Nowadays forecasting large watershed flooding has been in great demands as it  
151 impacts peoples and their properties at large range, but due to the scale effect, current  
152 distributed hydrological models employed for large watershed are at coarser  
153 resolution, which lowers its capability for flood forecasting and warning. For example,  
154 past application of distributed hydrological model for large watershed flood forecasting  
155 are at the resolution coarser than 1km grid cell (Lohmann et. al., 1998, Vieux et. al.,  
156 2004, Stisen et. al., 2008, Rwetabula et. al., 2007), the models employed in the  
157 pan-European Flood Awareness System (EFAS; Bartholmes et. al., 2009, Thielen et.  
158 al., 2009, 2010, Sood et. al., 2015, Kauffeldt et. al., 2016) are at 1-10km grid cell,  
159 which makes the result only applicapble for flood warning.

160

161 Challenge for distributed hydrological model application in large watershed flood  
162 forecasting is its need for huge computation resources, to cope with this challenge,  
163 two efforts could be made. One is to improve the computation efficiency of the  
164 distributed hydrological modeling in large watershed, another is implementing the  
165 model on high performance supercomputer so in the cases that the users are willing to  
166 pay a high computation cost, the flood forecasting of large watershed with high  
167 resolution could be done. In this study, the Liuxihe Model (Chen et. al., 2011, 2016), a  
168 physically based distributed hydrological model proposed for watershed flood  
169 forecasting, has been tried for flood forecasting of a large watershed in southern  
170 China to validate the feasibility of distributed hydrological model's application for  
171 large watershed flood forecasting.

## 172 **2 Method and data**

### 173 **2.1 Liujiang River Basin**

174 The river basin studied in this paper is the Liujiang River Basin(herein after referred  
175 to as LRB) in south China, which is the first order tributary of the Pearl River. LRB  
176 originates from Village Lang in Guizhou Province, and drains though Guizhou  
177 Province, Guangxi Zhuang Autonomous Region and Hunan Province with 72% of its  
178 drainage area in Guangxi Zhuang Autonomous Region. The length of its main channel  
179 is 1121 km, the total drainage area is 58270 km<sup>2</sup> that marks it a large river basin in  
180 China.

181 [Fig. 1 sketch map of Liujiang River Basin\(LRB\)](#)

182 LRB is a mountainous watershed. There are high mountains in the north and  
183 northwest of the watershed with high elevation, while in its south and southeast area,  
184 the elevations are relatively low. This topography helps forming severe flooding in the  
185 middle and downstream. The basin is in the sub-tropical monsoon climate zone with  
186 an average annual precipitation of 1800 mm, and the precipitation distribution is  
187 highly uneven both at spatial and temporal with 80% of its annual precipitation occurs  
188 in the summer. LRB is in the center of storm zone of Zhuang Autonomous Region,  
189 heavy storm was very frequent in the past. There are 59 disastrous flooding in the past  
190 400 years with recording since 1488, which makes LRB the tributary with most  
191 disastrous flooding among all the first order tributaries of the Pearl River. In the  
192 watershed, there is no significant reservoirs to store flood runoff, so flood forecasting  
193 is one of the most effective ways for the flood management.

### 194 **2.2 Liuxihe Model**

195 Liuxihe Model is a physically based distributed hydrological model proposed mainly  
196 for watershed flood forecasting (Chen, 2009, Chen et. al., 2011, 2016). Like other  
197 distributed hydrological models, Liuxihe Model divides the watershed into grid cell  
198 based on the DEM of the studied watershed. To keep a reasonable model performance,  
199 in the past experiences of Liuxihe Model research and application, the model

200 resolution is limited to 90m\*90m or 100m\*100m, but only used in small watersheds  
201 (Chen, 2009, Chen et. al., 2011, 2013, 2016, Liao et. al., 2012 a, b, Xu et. al., 2012 a,  
202 b). Precipitation, evaporation and runoff production are calculated at cell scale, runoff  
203 routes first on cell, then along the cell to river channel, and finally to the watershed  
204 outlet. As Liuxihe model is mainly used in the sub-tropical regions, so the runoff  
205 production is calculated based on the saturation-excess mechanism(Zhao, 1977). The  
206 runoff routing is classified as hill slope routing, river channel routing, subsurface  
207 routing and underground routing. The hill slope routing is regarded as the  
208 one-dimensional unsteady flow, and the kinematical wave approximation is employed  
209 to do the routing. The river channel routing is also regarded as the one-dimensional  
210 unsteady flow, but the diffusive wave approximation is employed to do the routing.  
211 The above methods are widely used in the dominated distributed hydrological models.

212

213 What makes Liuxihe Model unique is that the river channel cross section shape is  
214 assumed to be trapezoid. With this assumption, the river channel size could be  
215 represented with 3 dimensions, including the bottom width, side slope and bottom  
216 slope. One of the advantages with this assumption is that the river channel cross  
217 section size could be estimated with remotely sensed data(Chen, et.al, 2011), so  
218 Liuxihe Model could do river channel runoff routing real physically, thus making  
219 Liuxihe Model a fully distributed hydrological model. As there are too many river  
220 channel cross sections, and many of them are in the upstream of the watershed where  
221 it is not easily accessed, so in real hydrological modeling, directly measuring the river  
222 channel cross section sizes are impractical considering the high cost. For this reason,  
223 most of the distributed hydrological model could not be applied in real applications,  
224 or simply route the runoff with lumped methods which makes the model not a fully  
225 distributed hydrological model, thus lowering the model's capability in simulating or  
226 forecasting the watershed flood processes. Another advantage of this assumption is  
227 that it also simplifies the runoff routing, thus improves the model's computation  
228 efficiency. For this reason, even Liuxihe Model has a very high resolution, it still



229 could be used in real-time flood forecasting. This feature of Liuxihe Model in  
230 estimating river channel cross section sizes makes it has the potential to be used in  
231 large watershed flood forecasting.

232

233 Like other distributed hydrological model, when used in ungauged or data poor  
234 watershed flood forecasting, Liuxihe Model derives model parameters physically  
235 from the terrain property data. But if there is observed hydrological data, automatic  
236 parameter optimization methods could be tried. But as automatic parameter  
237 optimization needs thousands model runs, that makes it difficult to be used widely due  
238 to huge computing source requirement, which also make it taking long time in setting  
239 up the model. For this reason, a public computer cloud was set up for optimizing the  
240 parameters of Liuxihe Model which employs parallel computation techniques and was  
241 implemented on a supercomputer system(Chen et. al., 2013). With this development,  
242 Liuxihe Model could easily optimize its model parameters.

243

244 Above advancements of Liuxihe Model in estimating river channel cross section sizes  
245 with remotely sensed data, automatic parameters optimization and supercomputing  
246 makes it has the potential to be used in large watershed flood forecasting, so in this  
247 study, the Liuxihe model is employed to study the LRB's flood forecasting.

### 248 **2.3 Hydrological data**

249 There are 66 rain gauges installed in the watershed. In this study, hydrological data of  
250 30 flood events has been collected, including the precipitation of the rain gauges and  
251 the river discharge of Liuzhou river gauge that locates in the downstream of the  
252 watershed and closes to the outlet as shown in Fig. 1 with a hourly step, brief  
253 information of these flood events is listed in Table 1.

254 [Table1 Brief information of flood events with data collected in LRB](#)

### 255 **2.4 Terrain property data**

256 Terrain property data includes DEM, land use/cover map and soil map, which are

257 used for setting up the distributed hydrological model for flood forecasting. In this  
258 study, the DEM was downloaded from the SRTM database (Falorni et al., 2005,  
259 Sharma et. al., 2014), the land use type was downloaded from the USGS land use type  
260 database (Loveland et. al., 1991, Loveland et. al., 2000), and the soil type was  
261 downloaded from FAO soil type database (<http://www.isric.org>). The downloaded  
262 DEM has a spatial resolution of 90m\*90m, considering LRB is large, the running load  
263 for the model with a resolution of 90m\*90m may be too heavy to run in this study, so  
264 the DEM is rescaled to the resolutions of 200m\*200m, as shown in Fig. 2(a). The  
265 downloaded land use and soil type were at 1000m\*1000m resolution, so there are  
266 rescaled to the same resolution of DEM, as shown in Fig. 2(b) and Fig. 2 (c)  
267 respectively.

### 268 Fig. 2 Terrain properties of LRB

269 The highest elevation and the lowest elevation of LRB are 2124 m and 42 m  
270 respectively. There are 9 land use types, including evergreen needle leaved  
271 forest(18.1%), evergreen broadleaved forest(31.0%), shrubbery(32.5%), mountain and  
272 alpine meadow(0.1%), slope grassland(13.7%), urban area(0.1%), river(0.2%),  
273 lakes(0.3%) and cultivated land(4%).

274

275 There are 11 soil types, including Humicacrisol(0.8%), Haplic and high activitive  
276 acrisol(1.5%), Ferralic cambisol(5%), Haplicluvisols(3.5%), Dystric cambisol(2.8%),  
277 Calcaric regosol(45.5%), Dystric regosol(2.9%), Haplic and weak active acrisol(18%),  
278 Artificial accumulated soil(1.5%), Eutricregosols and Black limestone soil(3.5%),  
279 Dystric rankers(15%).

## 280 **3 Results**

### 281 **3.1 Liuxihe Model set up**

282 Considering LRB is large, so the DEM with 200m×200m resolution is adopted to set  
283 up the model structure, not at the original 90m×90m resolution. The whole watershed  
284 is first divided into 1469900 cells by the DEM horizontally, which were further

285 categorized into hill slope cells and river cells. By using Strahler method (Strahler,  
286 1957), the river channel is divided into 3 order system as shown in Fig. 3, which  
287 divides the whole cells into 1463204 hill slope cells and 6696 river cells.

288 [Fig. 3 Liuxihe Model structure set up for LRB \(200m×200m resolution\)](#)

289 To estimate the river channel sizes, 178 virtual nodes were set on the river channel  
290 system, and 225 virtual channel sections were formed as shown in Figure 3. As in  
291 Liuxihe Model, the shape of the virtual channel sections is assumed to be trapezoid,  
292 so the cross section size is represented by three dimensions, including bottom width,  
293 side slope and bottom slope. As proposed in Liuxihe Model, the bottom width is  
294 estimated based on the satellite remote sensing imageries. For the side slope, it is a  
295 low sensitive data, so it could be estimated based on local experiences. For the bottom  
296 slope, it is calculated with the DEM along the virtual channel section.

### 297 **3.2 Parameter optimization**

298 In Liuxihe Model, an initial parameter set was derived first based on the terrain  
299 properties, including the DEM, soil type and land use/cover type, then the parameters  
300 will be optimized. In this study, for the insensitive parameter of the land use/cover  
301 related parameters, which is the evaporation coefficient, the initial value is set to be  
302 0.7 for all cells based on the experiences. The initial value of roughness, i.e., the  
303 Manning's coefficient, which is the sensitive parameter of the land use/cover related  
304 parameters, is derived from the land use/cover type based on references (Chen et.al.,  
305 1995, Zhang et.al., 2006, 2007, Shen et.al., 2007, Guo et.al., 2010, Li et.al., 2013,  
306 Zhang et.al., 2015), and listed in Table 2.

307 [Table 2 The initial values of land use/cover related parameters](#)

308 For the soil related parameters, including the water content at saturation condition, the  
309 water content at field condition, the water content at wilting condition, hydraulic  
310 conductivity at saturation condition, soil thickness and soil porosity characteristics  
311 coefficient b. Based on past modeling experiences and references (Zaradny, 1993,  
312 Anderson et al., 1996), a value of 2.5 is set to b for all soil type, and the water content

313 at wilting condition is set to be 30% of the water content at saturation condition. The  
314 soil thickness is estimated based on local experiences and listed in Table 3 for all soil  
315 types. The initial values of the water content at saturation condition, the water content  
316 at field condition and hydraulic conductivity at saturation condition are estimated by  
317 using the Soil Water Characteristics Hydraulic Properties Calculator (Arya et al., 1981)  
318 based on soil texture, organic matter, gravel content, salinity and compaction. The  
319 estimated initial values of soil-related parameters are listed in Table 3.

### 320 [Table 3 The initial values of soil related parameters](#)

321 In this study, PSO algorithm is employed to optimize the initial model parameters as  
322 PSO algorithm has been integrated into the Liuxihe Model Cloud (Chen et. al., 2013,  
323 Chen et. al., 2016). The number of particles of PSO algorithm is set to 20, while the  
324 value range of inertia weight  $\omega$  is set to 0.1 to 0.9, the value range of acceleration  
325 coefficients C1 is set to 1.25 to 2.75, and C2 to 0.5 to 2.5, and the maximum iteration  
326 is set to 50. Flood event of 20080609 is selected to optimize the parameters of Liuxihe  
327 model, and Fig. 4 shows the result of the parameter optimization. Among them, Fig.  
328 4(a) is the parameters evolving process, Fig. 4(b) is the changing curve of objective  
329 function which is set to minimize the peak flow error, Fig.4(c) is the simulated  
330 hydrograph of flood event 20080609 with the optimized parameters.

### 331 [Fig. 4 Parameter optimization results of Liuxihe Model for LRB with PSO algorithm](#)

332 From the results in Fig. 4, it could be found that after 14 evolutions, the parameters  
333 optimization process converges to its optimal values, and the optimal parameters are  
334 achieved, the simulated hydrological process of flood event that is used for parameter  
335 optimization is quite good fitting the observed hydrological process, it could be said  
336 that the parameter has a good optimization effect.

337

338 As mentioned above, the automatic parameter optimization of the distributed  
339 hydrological model is very time consuming. In this study, even supercomputer is  
340 employed with parallel computation techniques, the time used for this parameter

341 optimization is overwhelming, the total time used for achieving the above optimal  
342 parameters of Liuxihe model for LRB flood forecasting is 220 hours, more than 9  
343 days. Considering several runs are usually needed before achieving the final results,  
344 so the parameter optimization procedure may take a few months, this run time is  
345 really a good investment, but the validation results proves this is worth.

### 346 **3.3 Model validation**

347 The other 29 flood events were simulated by using the Liuxihe model with the above  
348 optimized parameters, and the simulated hydrographs of 8 flood events are shown in  
349 Fig. 5, the simulated hydrographs of 8 flood events with initial parameters are also  
350 shown in Fig. 5.

#### 351 [Fig. 5 Simulated flood events by Liuxihe Model with optimized parameters](#)

352 From the result of Fig. 5, it has been found that the simulated flood processes fits the  
353 observation reasonably well, particularly the simulated peak flow is quite good, and  
354 the simulated hydrological processes with optimized model parameter improved the  
355 simulated hydrological processes largely. To further analyze the effect of parameter  
356 optimization on model performance improvement, five evaluation indices of the  
357 simulated flood events, including the Nash–Sutcliffe coefficient, the correlation  
358 coefficient, the process relative error, the peak flow error and water balance  
359 coefficient are calculated from the simulated results. Table 4 listed the 5 indices for  
360 both the simulated results with the initial parameters and the optimized parameters.

#### 361 [Table 4 Evaluation indices of the simulated flood events](#)

362 From Table 4, it could be seen that the five evaluation indices are quite good for the  
363 simulated hydrological processes with the optimized model parameters. The average  
364 peak flow error is 5% with 14% the maximum. The average Nash–Sutcliffe  
365 coefficient, correlation coefficient, process relative error and water balance coefficient  
366 are 0.82, 0.83, 0.22 and 0.87 respectively, that are also quite good for large river basin  
367 flood simulation. Five evaluation indices of the simulated hydrological processes with  
368 the optimized model parameters are also good improvements to those simulated with

369 the initial parameters, those are 0.64, 0.62, 0.37, 0.29 and 0.78. There are excellent  
370 improving in all five indices, with the average increases of 0.18, 0.21 and 0.09 of the  
371 average Nash–Sutcliffe coefficient, correlation coefficient and water balance  
372 coefficient respectively, and the average decreases of the peak flow error and process  
373 relative error are 24% and 15% respectively. So it could be concluded that the Liuxihe  
374 Model set up in LRB with optimized parameters are reasonable and could be used for  
375 flood forecasting of LRB. This also implies that parameter optimization of distributed  
376 hydrological model could improve model performances, and it should be done when it  
377 is possible.

## 378 **4 Discussions**

### 379 **4.1 Computation time vs model resolution**

380 To evaluate the spatial resolution scaling effect of distributed hydrological modeling  
381 in LRB, the DEM with 90m\*90m resolution is rescaled to the resolutions of  
382 400m\*400m, 500m\*500m, 600m\*600m and 1000m\*1000m respectively, the land use  
383 and soil type at 1000m\*1000m resolution are also rescaled to the same resolutions of  
384 the DEM used. Liuxihe models for LRB flood forecasting at the above resolutions are  
385 then set up with the above methods, and the model structures are shown in Fig. 6.

#### 386 [Fig. 6 Liuxihe Model structure set up for LRB with different resolution](#)

387 With different spatial resolution, the numbers of grid cells, hill slope cells and river  
388 cells are different, but the river channel order are all set to 3, the numbers of virtual  
389 channel nodes for 400m\*400m, 500m\*500m, 600m\*600m and 1000m\*1000m  
390 resolution models are 100, 68, 46 and 33 respectively, numbers of grid cells, hill slope  
391 cells and river cells with different model resolution are listed in Table 5. , the sizes of  
392 every virtual cross sections are measured with the above method.

#### 393 [Table 5 Grid cell numbers with different model spatial resolution](#)

394 From Table 5, it could be seen, number of grid cells of the model with 200m\*200m  
395 resolution is 4 times of that with 400m\*400m resolution, 6.25 times of that with  
396 500m\*500m resolution, 9 times of that with 600m\*600m resolution, and 25 times of

397 that with 1000m\*1000m resolution, it increases at an approximate exponential of  
398 power 2, not linearly with the model resolution.

399

400 Parameters of the models with 400m\*400m, 500m\*500m, 600m\*600m and  
401 1000m\*1000m resolutions are optimized with PSO algorithm by using the same flood  
402 event data, and listed in Table 6. From the results it could be seen that some  
403 parameters are significantly different with resolution variation, but some changes little,  
404 this implies that the model parameters are resolution-dependent.

405 [Table 6 Optimized parameters with different model spatial resolution](#)

406 Computation times required for parameter optimization are quite different. For the  
407 model with 200m\*200m resolution, the time for parameter optimization is 220 hours,  
408 while that for models with 400m\*400m, 500m\*500m, 600m\*600m and  
409 1000m\*1000m resolutions are 80, 55, 35 and 12 hours respectively. The times needed  
410 for parameter optimization of the model at 200m\*200m resolution is 2.75 times of  
411 that for 400m\*400m resolution model, 4 times of that for 500m\*500m resolution  
412 model, 6.3 times of that for 600m\*600m resolution model, and 18.3 times of that for  
413 1000m\*1000m resolution model respectively. Considering the time needed for model  
414 run, the 200m\*200m model resolution is regarded as appropriate for LRB.

## 415 **5.2 Model performance vs model resolution**

416 The other 29 flood events are also simulated with the models at 400m\*400m  
417 resolution, 500m\*500m resolution, 600m\*600m resolution, and 1000m\*1000m  
418 resolution. Simulated hydrograph of 5 flood events, including 2 big, 2 medium and  
419 one small ones are shown in Fig. 7.

420 [Fig. 7 Simulated results with different model resolutions](#)

421 From the results it could be seen that the simulated hydrological processes with 5  
422 different spatial resolutions are quite different. The result simulated with  
423 1000m\*1000m resolution is not so good, although the flood shapes are simulated well,

424 but the peak flow are much lower than that of the observation, so the result is not  
425 acceptable, and could not be recommended. The result simulated with 600m\*600m  
426 resolution is better than that of 1000m\*1000m resolution, but there is still big peak  
427 flow error, so the result with 600m\*600m resolution is also not recommended. The  
428 result simulated with 500m\*500m resolution model is a big improvement to those  
429 simulated with 600m\*600m resolution and 1000m\*1000m resolution model, the flood  
430 shapes are more similar to the observation, and the peak flow is also get closer to the  
431 observation, so it could be recommended for flood forecasting if the spatial resolution  
432 could not be much finer. The result simulated with 400m\*400m resolution has some  
433 improvements to that of 500m\*500m resolution, but it is not significant, so it is not  
434 recommended to replace that at 500m\*500m resolution. The result simulated with  
435 200m\*200m resolution model is a big improvement to those simulated with  
436 400m\*400m resolution and 500m\*500m resolution model, the flood shapes fits the  
437 observation much better, and the peak flows are much closer to the observation also, it  
438 is a good simulation result and could be recommended for flood forecasting of LRB.  
439 As the results are good enough so there is no need to further explore the finer model  
440 resolution.

## 441 **5 Conclusions**

442 By employing Liuxihe Model, a physically based distributed hydrological model, this  
443 study sets up a distributed hydrological model for the flood forecasting of Liujiang  
444 River Basin in southern China that could be regarded as a large watershed. Terrain  
445 data including DEM, soil type and land use type are downloaded from the website  
446 freely, and the model structure with a high resolution of 200m\*200m grid cell is set  
447 up, which divides the whole watershed into 1469900 grid cells that is further divided  
448 into 1463204 hill slope cells and 6696 river cells. The initial model parameters are  
449 derived from the terrain property data, and then optimized by using the PSO algorithm  
450 with one observed flood event, which improves the model performance largely. 29  
451 observed flood events are simulated by using the model with optimized parameters,  
452 the results are analyzed, and the model scaling effects are studied. Based on these



453 studies, following conclusions are suggested.

454

455 1. In Liuxihe Model, the river channels are divided into virtual channel sections, and  
456 the cross section shapes are assumed to be trapezoid and the size is the same within  
457 the virtual channel section. The size of the virtual channel section is simplified to  
458 three indices, including bottom width, side slope and bottom slope, those are  
459 estimated by using remote sensing imageries. This method not only makes the  
460 distributed model application practical, but also simplifies the river channel routing  
461 method. This significantly increases the model computation efficiency, and makes it  
462 could be used in larger watersheds. Results in this study shows the model setting up  
463 with this method has a reasonable performance, i.e., this simplification has not  
464 sacrificed the model's flood simulation accuracy significantly, so this simplification  
465 could be used in large watershed distributed hydrological modelling, including  
466 Liuxihe model and other models.

467

468 2. Uncertainty exists for physically derived model parameters. Parameter optimization  
469 could reduce parameter uncertainty, and is highly recommended to do so when there  
470 is some observed hydrological data. In this study, the simulated hydrograph with  
471 optimized model parameters is more fitting the observed hydrograph in shape than  
472 that simulated with initial model parameters, the 5 evaluation indices are improved  
473 also. The average increases of Nash–Sutcliffe coefficient, correlation coefficient and  
474 water balance coefficient are 0.18, 0.21 and 0.09 respectively, the average decreases  
475 of the peak flow error and process relative error are 24% and 15% respectively, this  
476 implies that the model performance is improved significantly with parameter  
477 optimization.

478

479 3. Computation time needed for running a distributed hydrological model increases  
480 exponentially at an approximate power of 2, not linearly with the increasing of model  
481 spatial resolution. In this study, the computation time required for parameter

482 optimization for the model with 200m\*200m resolution is 220 hours, that is 4 times of  
483 that of the model at 500m\*500m and 18.3 times of that of the model at 1000m\*1000m  
484 resolution respectively. Based on the Liuxihe Model cloud system implemented on the  
485 high performance supercomputer, the 200m\*200m model resolution is the highest  
486 resolution that could be fulfilled in modeling Liujiang River Basin flooding with  
487 Liuxihe Model considering the computation cost. This also means that if the user  
488 could pay high computation cost, then larger watershed could also be modelled with  
489 Liuxihe Model by implemented the Liuxihe Model cloud system on a much more  
490 advanced high performance supercomputer, this could be easily done nowadays if the  
491 user thinks this investment is a worth doing.

492

493 4. In forecasting watershed flood by using distributed hydrological model, minimum  
494 model spatial resolution needs to be maintained to keeping the model an acceptable  
495 performance. Usually if the model spatial resolution increases, i.e., the grid cell gets  
496 smaller, the model performance is better, but this will increase the run time  
497 significantly, so there is a threshold model spatial resolution to keep the model  
498 performance reasonable while keep the model run at the least time. In this study, the  
499 threshold model spatial resolution is at 500m\*500m grid cell, but the resolution at  
500 200m\*200m grid cell is recommended by trading-off between the computation cost  
501 and the model performance. This conclusion may be different in different watersheds  
502 for Liuxihe Model, or even different in the same watershed for different models.

503

504 5. Terrain data downloaded freely from the website derived the river channel system  
505 that is very similar to the natural river channel system after it is rescaled from its  
506 original spatial resolution of 90m\*90m to 200m\*200m, 500m\*500m and  
507 1000m\*1000m, but the higher resolution DEM describes the river channel more in  
508 details. This means that the freely downloaded DEM could be used to set up the  
509 Liuxihe Model for Liujiang River Basin flood forecasting.

510 ***Acknowledgements:*** This study is supported by the Special Research Grant for the  
511 Water Resources Industry (funding no. 201301070), the National Science Foundation  
512 of China (funding no. 50479033), and the Basic Research Grant for Universities of  
513 the Ministry of Education of China (funding no. 13lgjc01).

514

515

516

517 **Figures**

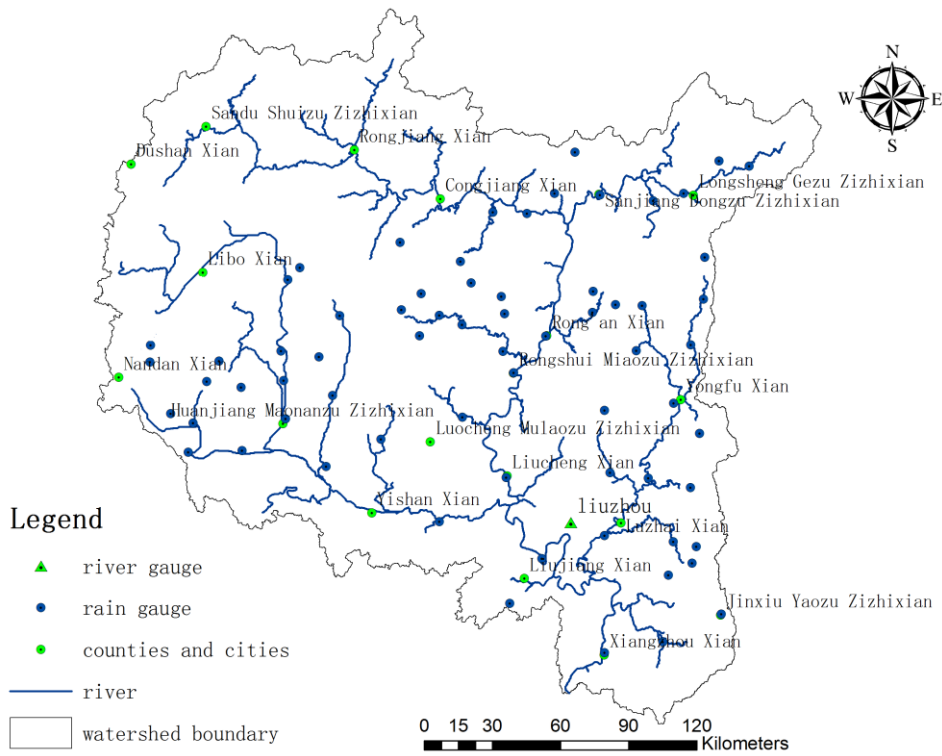

518

519

Fig. 1 sketch map of Liujiang River Basin

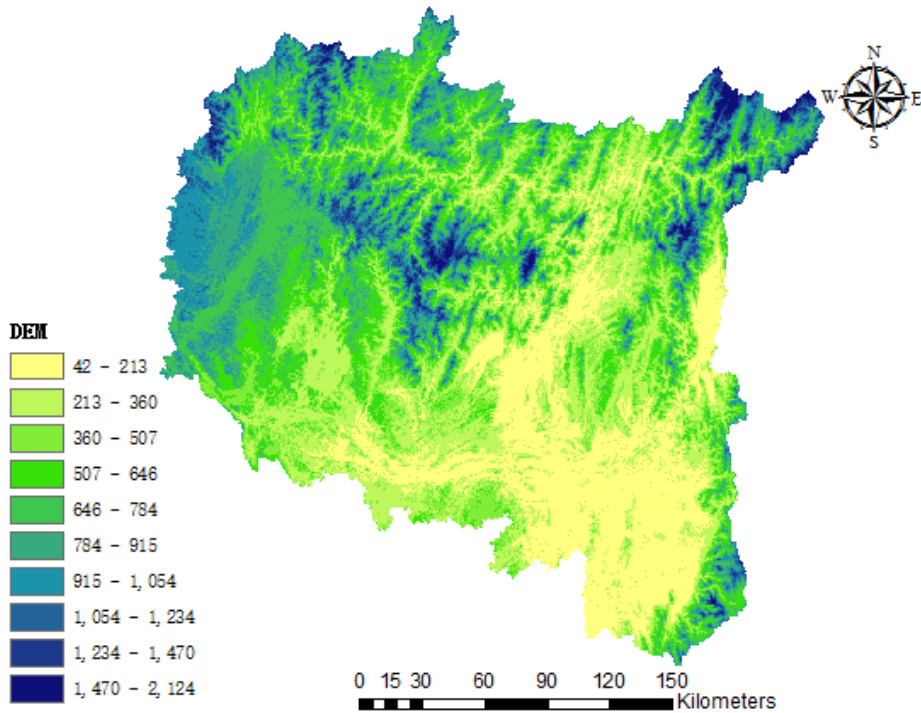

520

521

(a) DEM

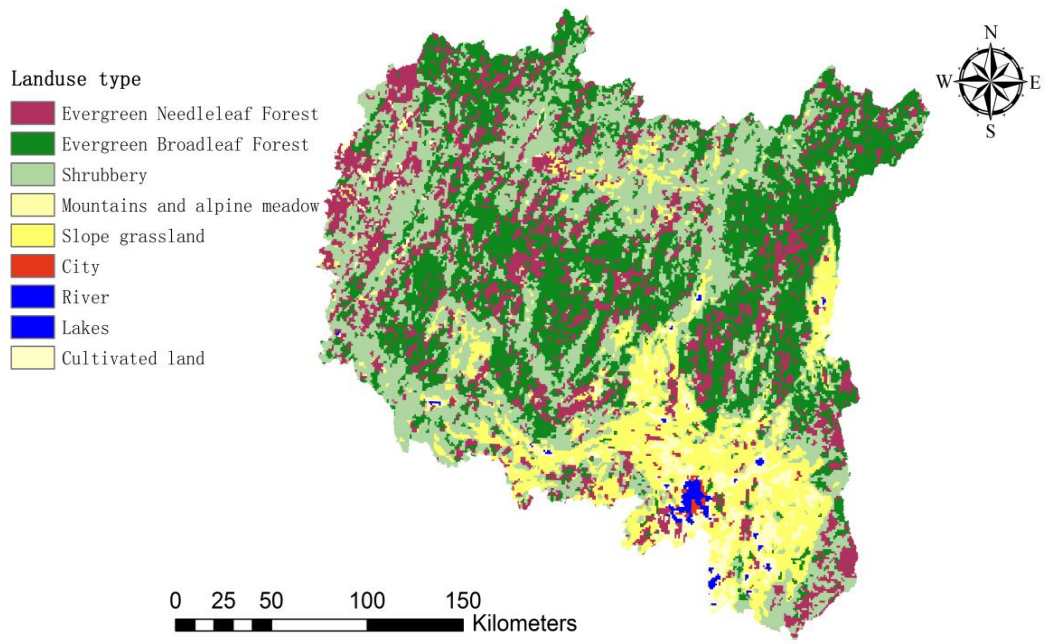

522

523

(b) land use

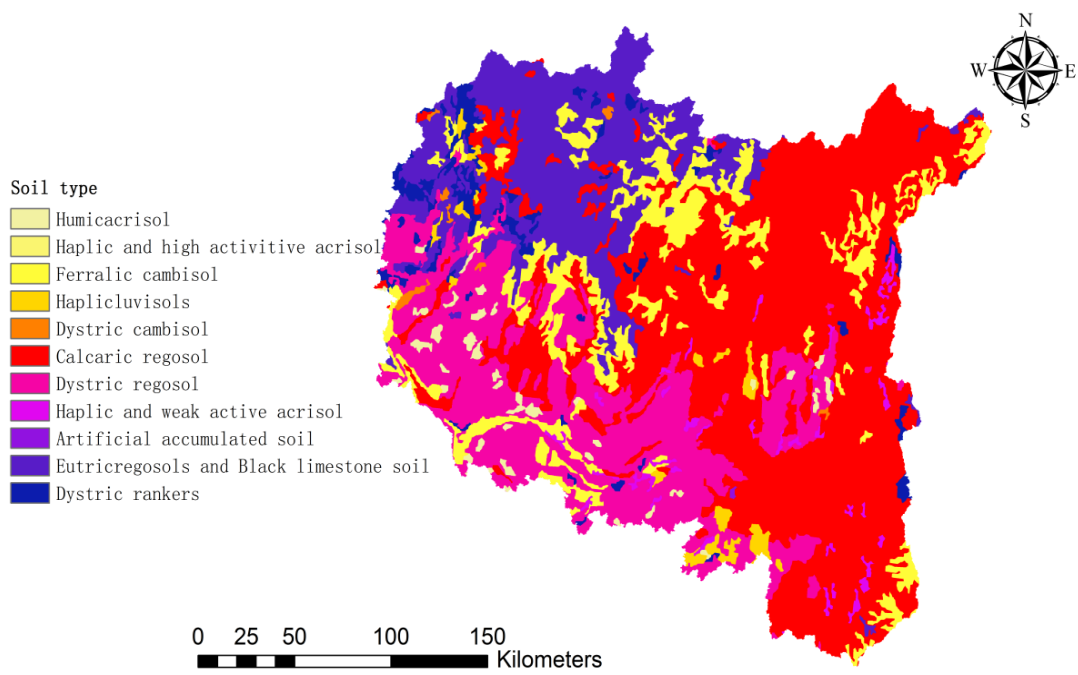

524

525

(c) soil type

526

Fig. 2 Terrain properties of LRB

527

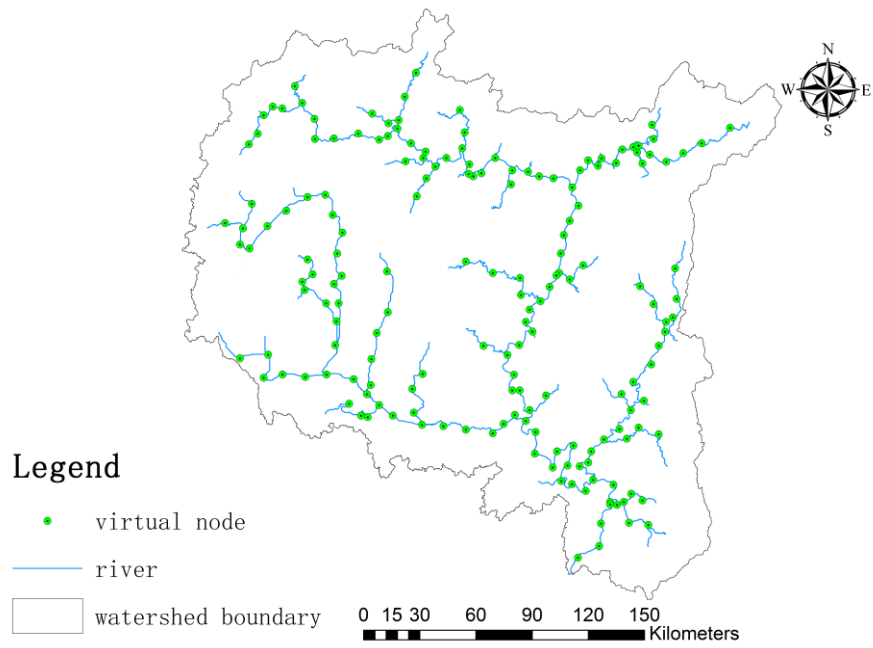

528

529 Fig. 3 Liuxihe Model structure set up for LRB (200m×200m resolution)

530

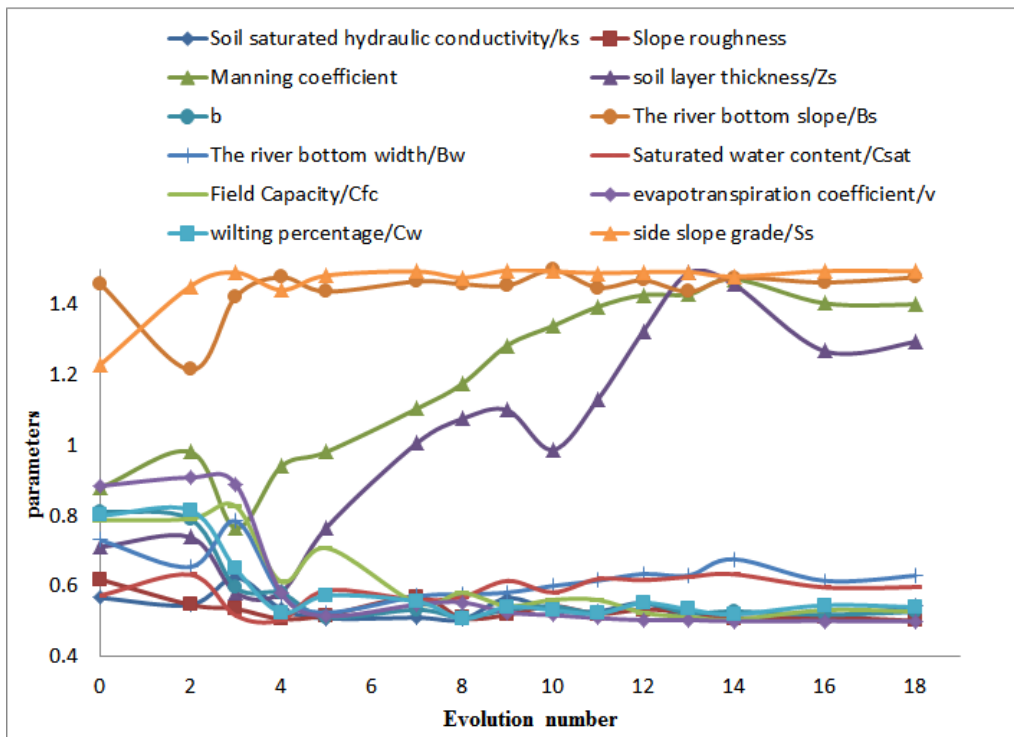

531

532

533

534

535

(a) Parameter evolution process

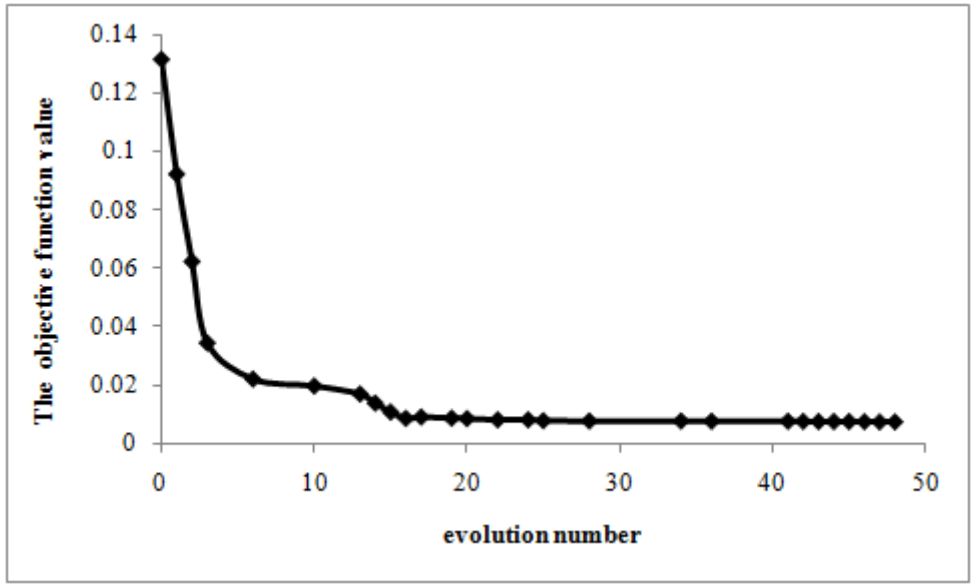

(b) Changing curve of objective function

536  
537  
538  
539

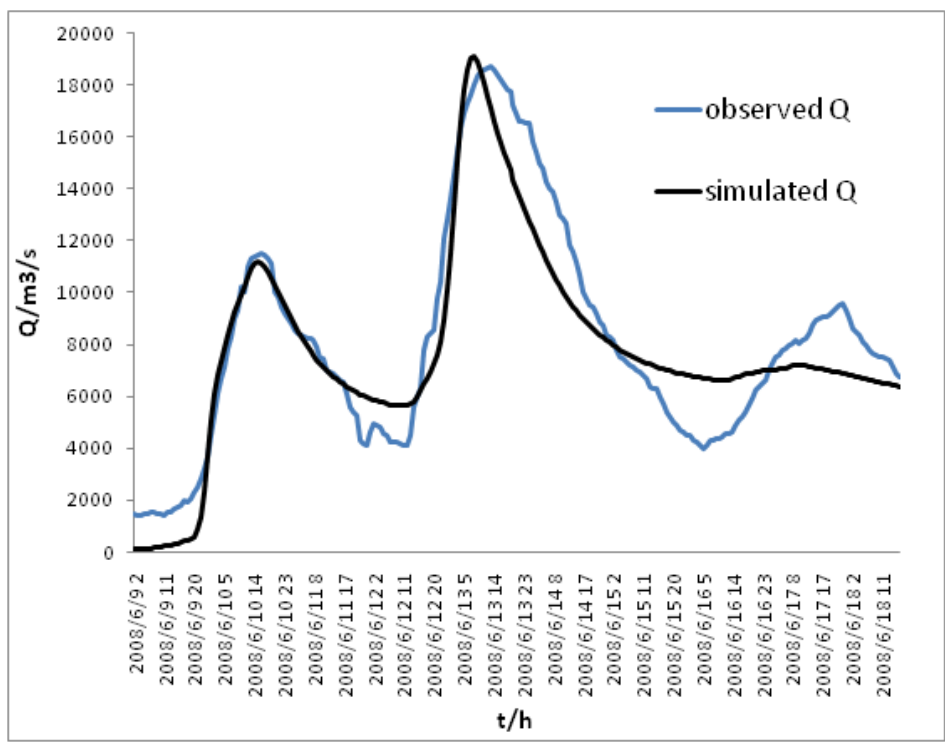

(c) Simulated flood process

540  
541  
542  
543

Fig. 4 Parameter optimization results of Liuxihe Model for LRB with PSO algorithm

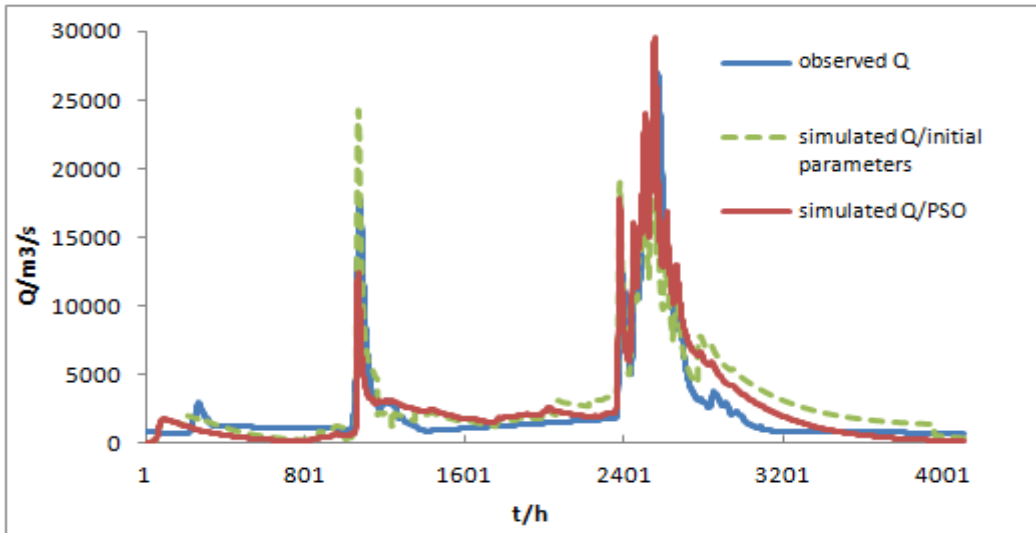

544  
545

(a) flood event 1988051620

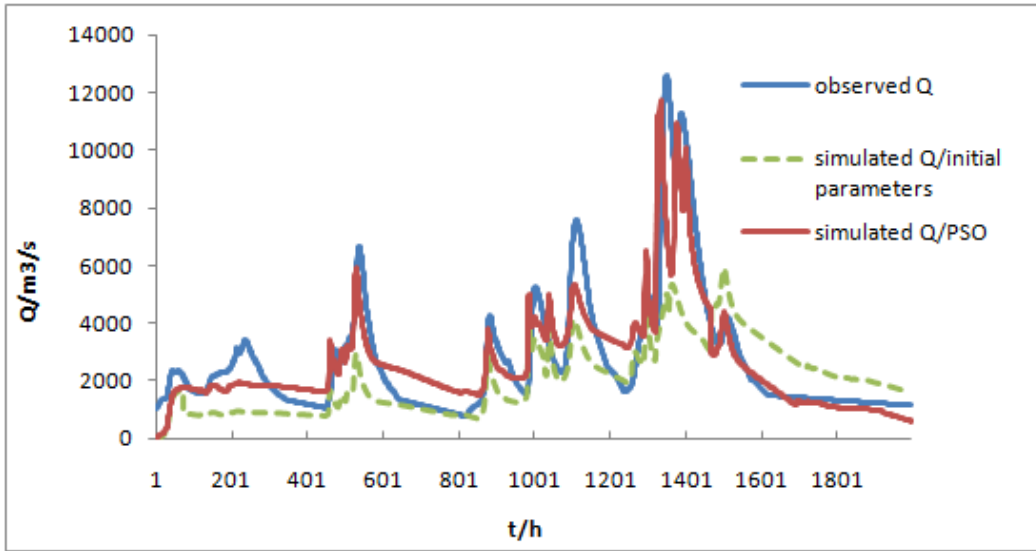

546  
547

(b) flood event 1982042116

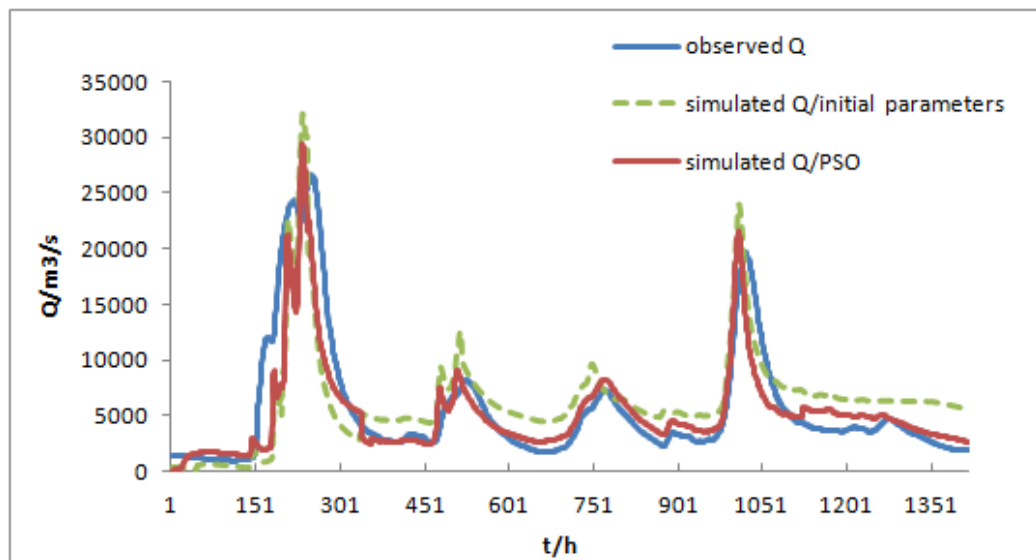

548  
549

(c) flood event 1994060700



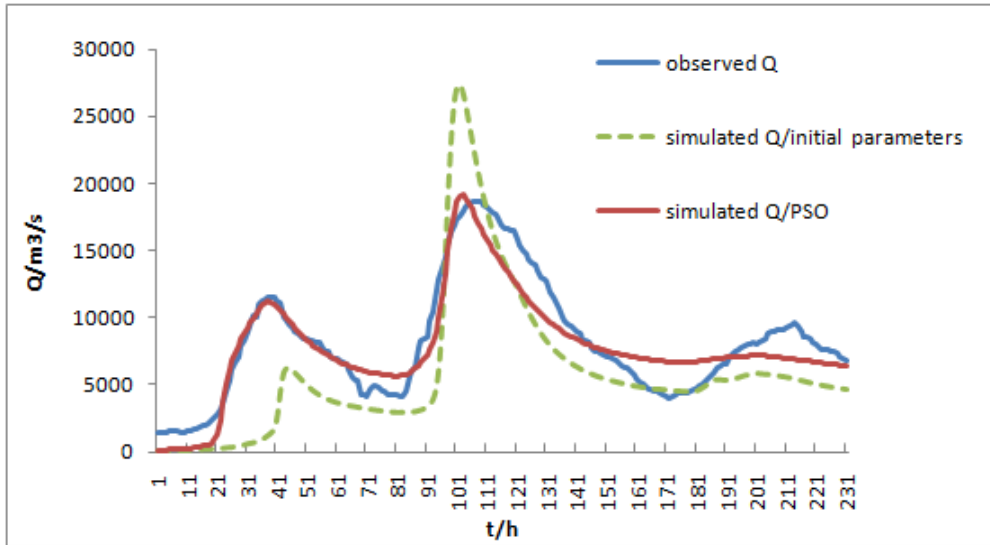

550

551

(d) flood event 2008060902

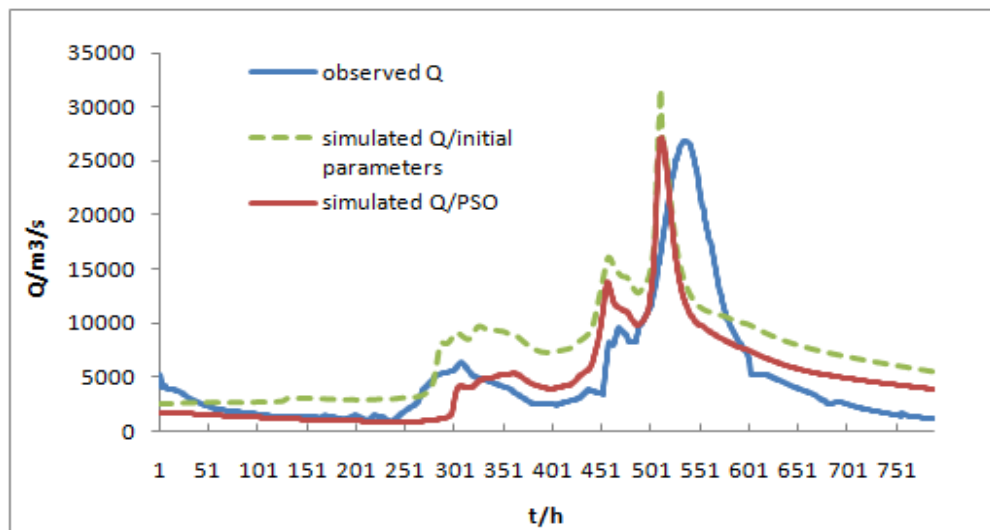

552

553

(e) flood event 200906090800

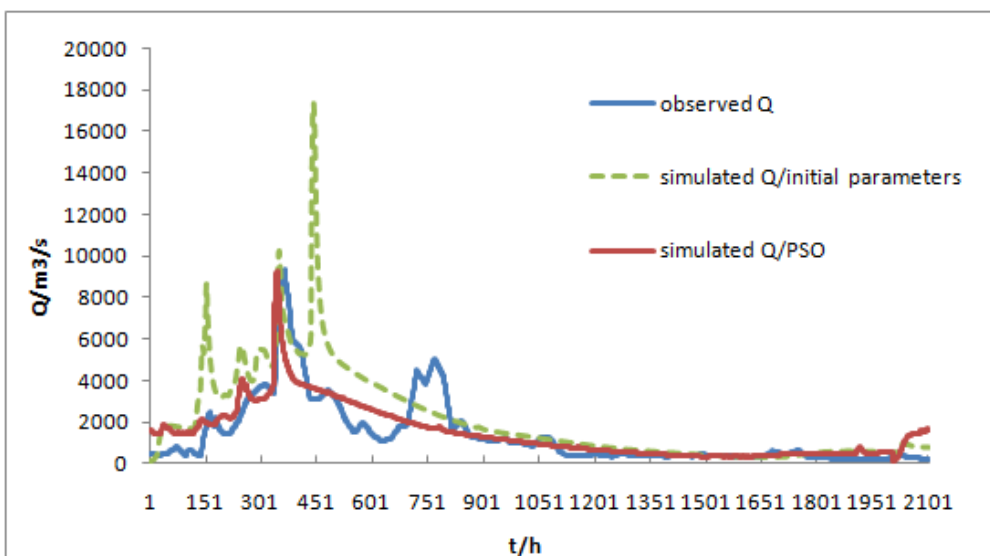

554

555

(f) flood event 201106010900

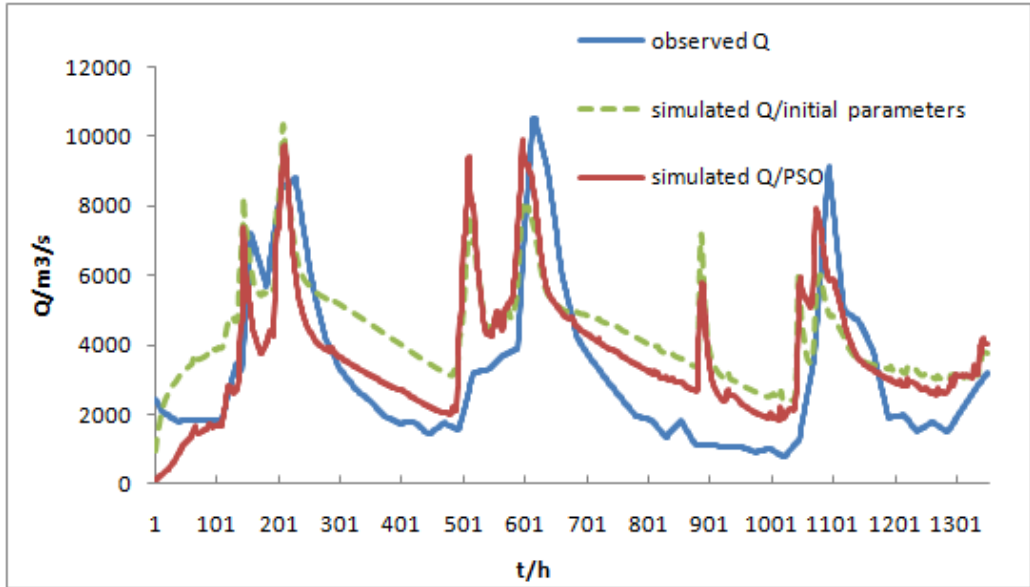

556

557

(g) flood event 201206022000

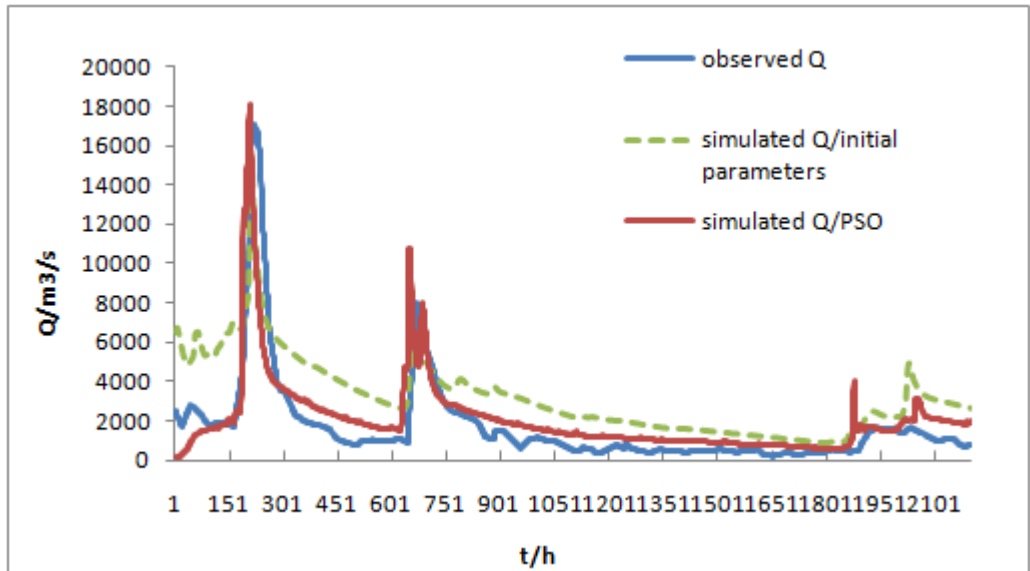

558

559

(h) flood event 201306011400

560

Fig. 5 Simulated flood events by Liuxihe Model with optimized parameters

561

562

563

564

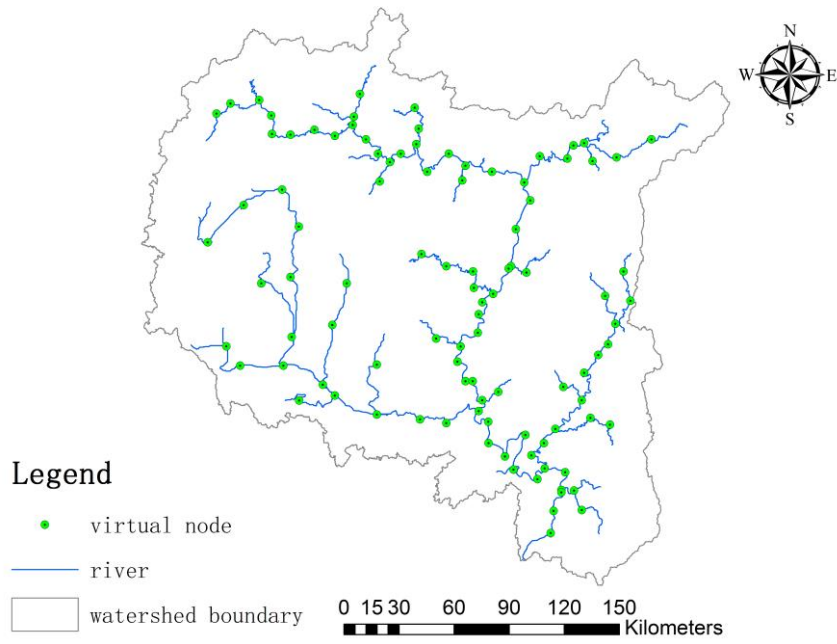

565

566

567

(a) 400m\*400m resolution

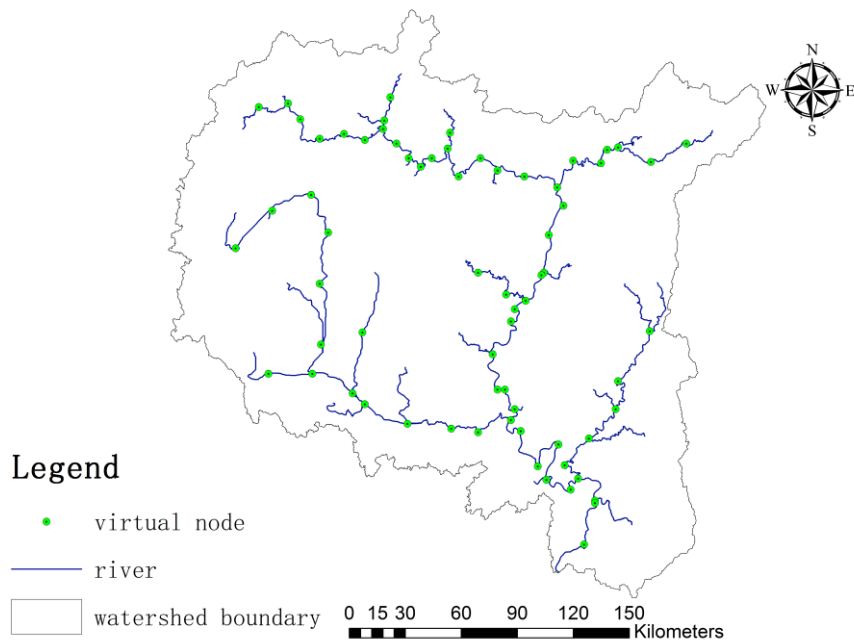

568

569

(b) 500m×500m resolution

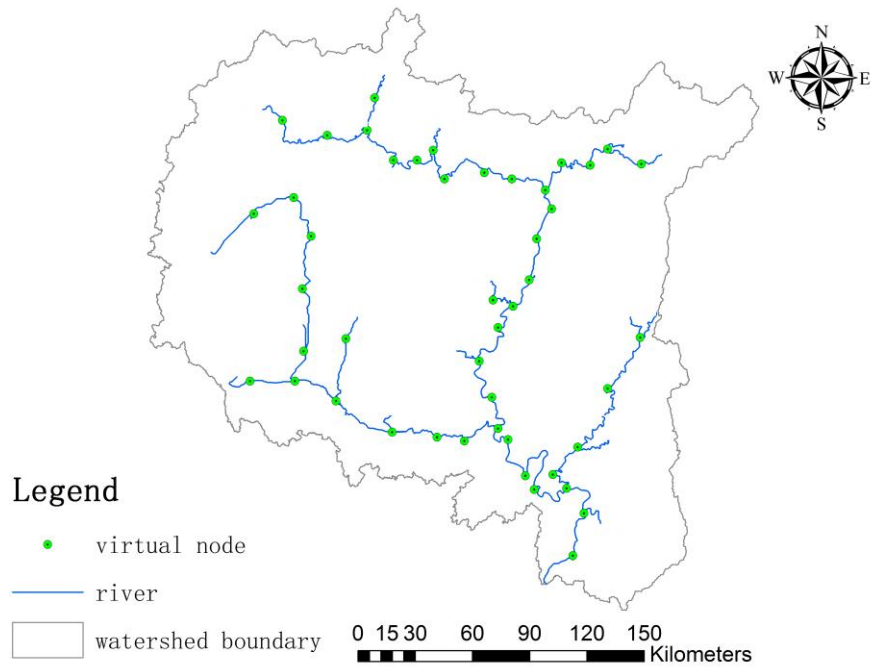

(c) 600m\*600m resolution

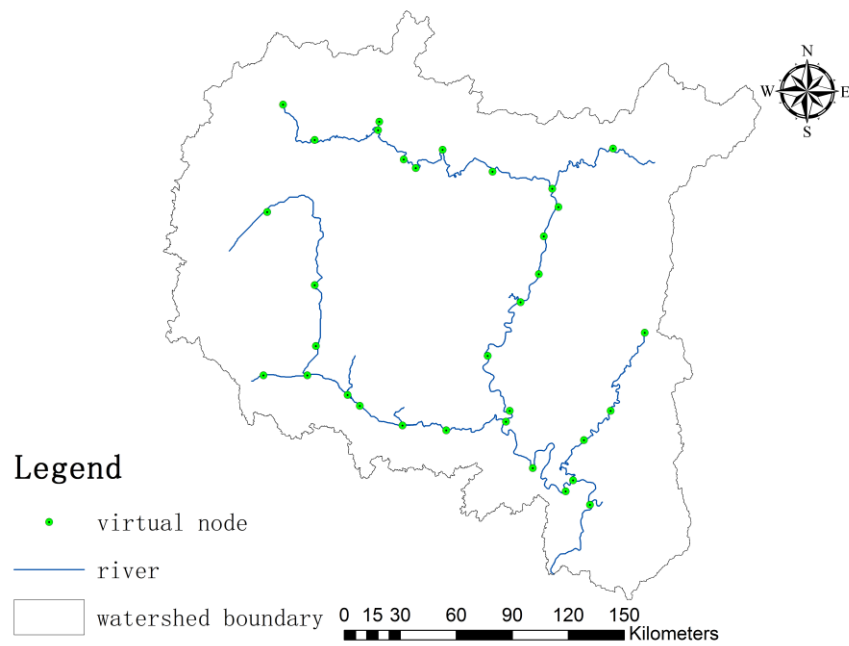

(d) 1000m×1000m resolution

574 Fig. 6 Liuxihe Model structure set up for LRB with different resolution

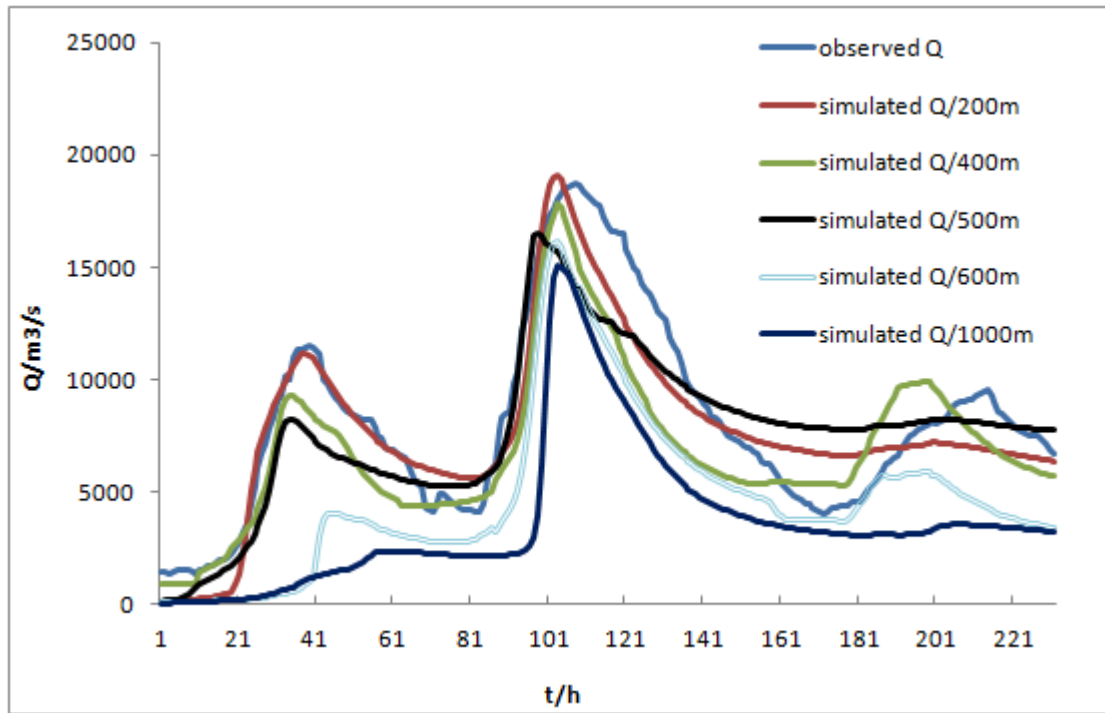

575

576

(a) flood event 2008060902

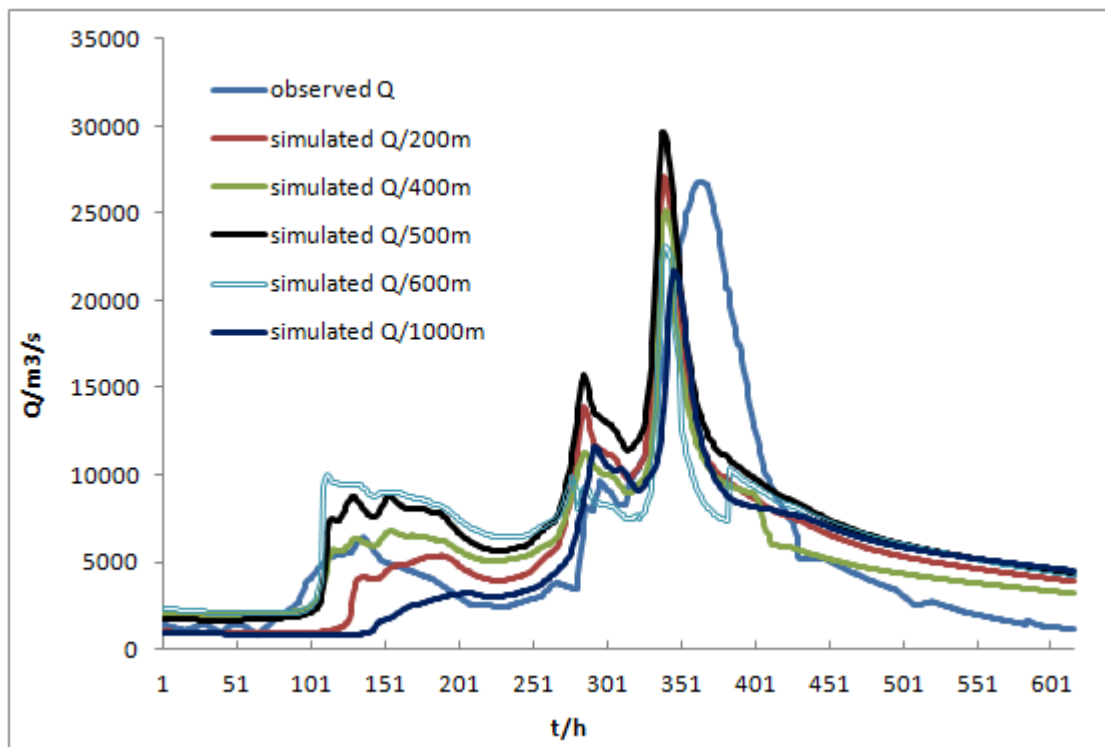

577

578

579

(b) flood event 2009060908

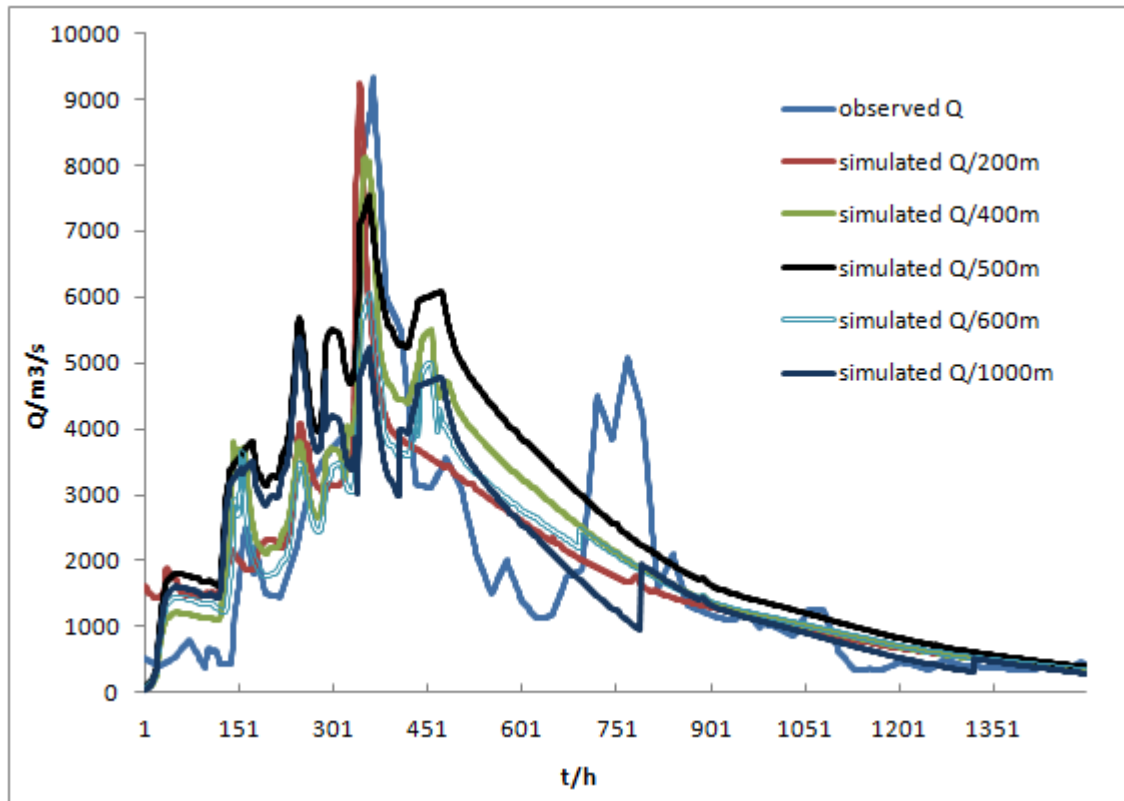

580

581

(c) flood event 2011060109

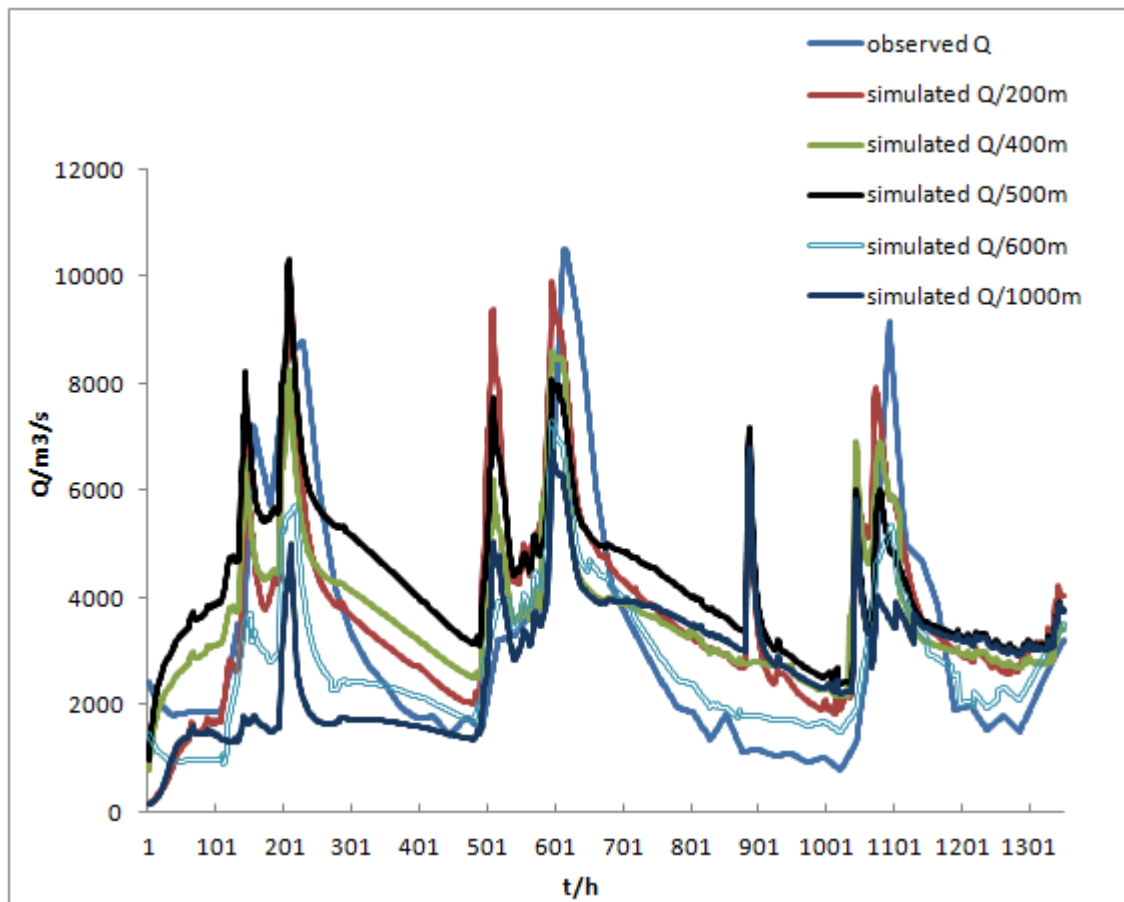

582

583

(d) flood event 2012060220

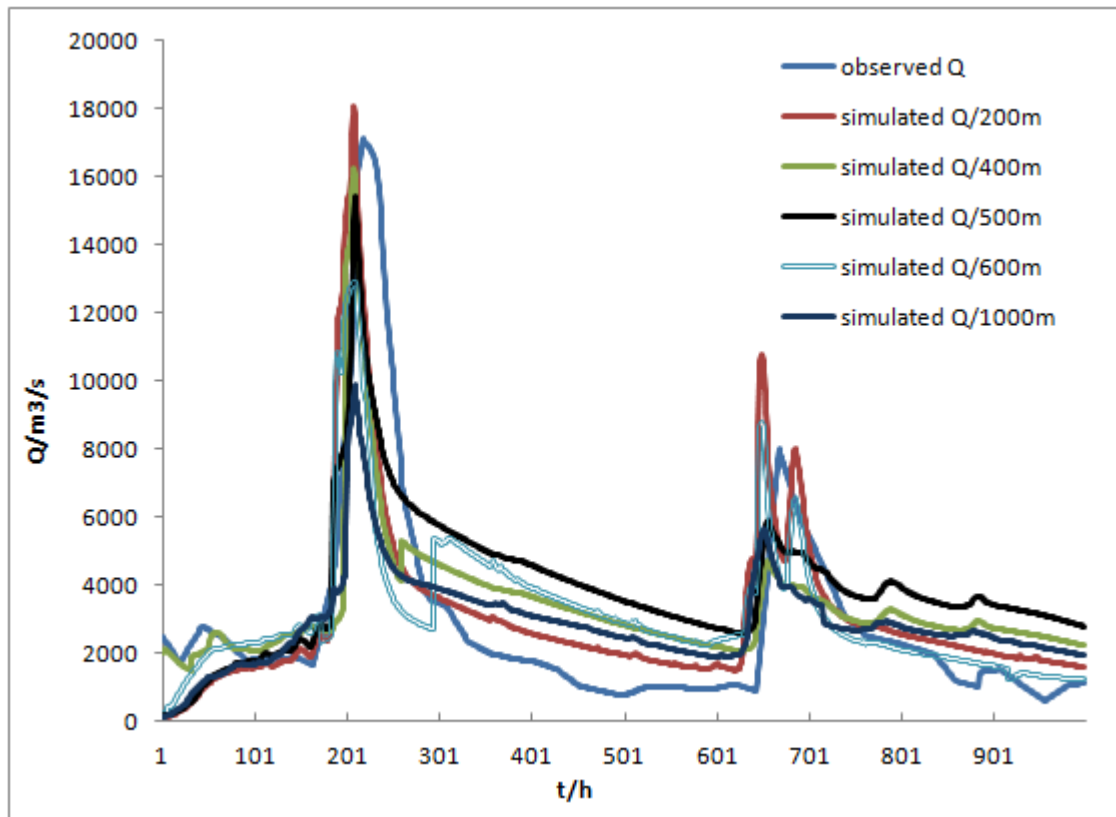

584

585

(e) flood event 2013060114

586

Fig. 7 Simulated results with different model resolutions

587

588

589 **Tables**

590

591

Table1 Brief information of flood events in LRB

| <i>No.</i> | <i>Floods No.</i> | <i>Start time</i><br>( <i>yyyymmddhh</i> ) | <i>End time</i><br>( <i>yyyymmddhh</i> ) | <i>length of</i><br><i>time/h</i> | <i>peak flow</i><br>( <i>m<sup>3</sup>/s</i> ) |
|------------|-------------------|--------------------------------------------|------------------------------------------|-----------------------------------|------------------------------------------------|
| 1          | 1982042116        | 1982042116                                 | 1982110216                               | 4614                              | 12600                                          |
| 2          | 1983020308        | 1983020308                                 | 1983021722                               | 350                               | 7880                                           |
| 3          | 1984021100        | 198402100                                  | 1984040105                               | 1205                              | 12900                                          |
| 4          | 1985011900        | 1985011900                                 | 1985021114                               | 544                               | 11400                                          |
| 5          | 1986022300        | 1986022300                                 | 1986042004                               | 1334                              | 12200                                          |
| 6          | 1987050100        | 1987050100                                 | 1987071700                               | 1848                              | 10800                                          |
| 7          | 1988070620        | 1988070620                                 | 1988100605                               | 2915                              | 27000                                          |
| 8          | 1989042600        | 1989042600                                 | 1989081009                               | 2499                              | 7500                                           |
| 9          | 1990050100        | 1990001000                                 | 1990072306                               | 2006                              | 11400                                          |
| 10         | 1991053118        | 1991053118                                 | 1991062806                               | 686                               | 14300                                          |
| 11         | 1992042900        | 1992042900                                 | 1992072107                               | 1977                              | 18100                                          |
| 12         | 1993060900        | 1993060900                                 | 1993082408                               | 1818                              | 21200                                          |
| 13         | 1994060700        | 1994060700                                 | 1994080706                               | 1416                              | 26500                                          |
| 14         | 1995052100        | 1995052100                                 | 1995071506                               | 1296                              | 17300                                          |
| 15         | 1996060600        | 1996060600                                 | 1996081808                               | 1728                              | 33700                                          |
| 16         | 1997060400        | 1997060400                                 | 1997062406                               | 476                               | 13600                                          |
| 17         | 1998051600        | 1998051600                                 | 1998090100                               | 2520                              | 19600                                          |
| 18         | 1990050100        | 1999050100                                 | 1999080404                               | 1134                              | 17800                                          |
| 19         | 2000052100        | 2000052100                                 | 2000061809                               | 659                               | 24100                                          |
| 20         | 2001051500        | 2001051500                                 | 2001062300                               | 910                               | 14200                                          |
| 21         | 2002042600        | 2002042600                                 | 2002081000                               | 2520                              | 17900                                          |
| 22         | 2003060600        | 2003060600                                 | 2003072103                               | 843                               | 11600                                          |
| 23         | 2004070300        | 200407000                                  | 2004081508                               | 998                               | 23700                                          |
| 24         | 2005061400        | 2005061400                                 | 2005070702                               | 552                               | 16400                                          |
| 25         | 2006060400        | 2006060400                                 | 2006071000                               | 870                               | 13200                                          |
| 26         | 2008060900        | 2008060900                                 | 2008061908                               | 238                               | 18700                                          |
| 27         | 2009060908        | 2009060908                                 | 2009071208                               | 788                               | 26800                                          |
| 28         | 2011061090        | 2011061009                                 | 2011090104                               | 2004                              | 9153                                           |
| 29         | 2012060220        | 2012060220                                 | 2012080101                               | 1351                              | 10500                                          |
| 30         | 2013060114        | 2013060114                                 | 2013090114                               | 2200                              | 17100                                          |

592

593

594

595



596  
597  
598

Table 2 The initial values of land use/cover related parameters

| <i>Land use/cover</i>        | <i>evaporation coefficient</i> | <i>roughness coefficient</i> |
|------------------------------|--------------------------------|------------------------------|
| Evergreen needle leaf forest | 0.7                            | 0.4                          |
| Evergreen broadleaf forest   | 0.7                            | 0.6                          |
| Shrubbery                    | 0.7                            | 0.4                          |
| Mountains and alpine meadow  | 0.7                            | 0.2                          |
| Slope grassland              | 0.7                            | 0.3                          |
| City                         | 0.7                            | 0.05                         |
| Cultivated land              | 0.7                            | 0.35                         |

599  
600  
601  
602  
603  
604  
605

Table 3 The initial values of soil related parameters

| <i>Soil Type</i>                   | <i>soil thickness (mm)</i> | <i>water content at saturation condition</i> | <i>water content at field condition</i> | <i>hydraulic conductivity at saturation condition (mm/h)</i> |
|------------------------------------|----------------------------|----------------------------------------------|-----------------------------------------|--------------------------------------------------------------|
| Humicacrisol                       | 800                        | 0.65                                         | 0.32                                    | 3.5                                                          |
| Haplic and high active acrisol     | 900                        | 0.57                                         | 0.43                                    | 4.2                                                          |
| Ferralic cambisol                  | 850                        | 0.63                                         | 0.38                                    | 20.5                                                         |
| Haplicluvisols                     | 980                        | 0.46                                         | 0.15                                    | 2.6                                                          |
| Dystric cambisol                   | 950                        | 0.55                                         | 0.41                                    | 14                                                           |
| Calcaric regosol                   | 1100                       | 0.62                                         | 0.24                                    | 5.6                                                          |
| Dystric regosol                    | 840                        | 0.45                                         | 0.27                                    | 12.5                                                         |
| Haplic and weak active acrisol     | 1050                       | 0.58                                         | 0.16                                    | 4.6                                                          |
| Artificial accumulated soil        | 1000                       | 0.63                                         | 0.34                                    | 5.5                                                          |
| Eutricregosols and Black limestone | 550                        | 0.75                                         | 0.27                                    | 3.5                                                          |
| Dystric rankers                    | 380                        | 0.78                                         | 0.36                                    | 8                                                            |

606  
607  
608  
609  
610

Table 4 Evaluation indices of the simulated flood events

| ID | floods      | parameters | Nash–Sutcliffe coefficient/C | Correlation coefficient/R | Process relative error/P | Peak flow relative error/E | Water balance coefficient/W |
|----|-------------|------------|------------------------------|---------------------------|--------------------------|----------------------------|-----------------------------|
| 1  | 1982081219  | initial    | 0.52                         | 0.48                      | 0.56                     | 0.58                       | 0.52                        |
|    |             | optimized  | 0.84                         | 0.75                      | 0.30                     | 0.01                       | 0.83                        |
| 2  | 1983020308  | initial    | 0.60                         | 0.55                      | 0.45                     | 0.26                       | 0.65                        |
|    |             | optimized  | 0.82                         | 0.84                      | 0.21                     | 0.04                       | 0.89                        |
| 3  | 1984010100  | initial    | 0.62                         | 0.71                      | 0.38                     | 0.32                       | 0.75                        |
|    |             | optimized  | 0.75                         | 0.89                      | 0.26                     | 0.14                       | 0.96                        |
| 4  | 1985010100  | initial    | 0.58                         | 0.57                      | 0.35                     | 0.33                       | 0.85                        |
|    |             | optimized  | 0.73                         | 0.87                      | 0.17                     | 0.01                       | 1.05                        |
| 5  | 1986010100  | initial    | 0.65                         | 0.62                      | 0.38                     | 0.25                       | 0.62                        |
|    |             | optimized  | 0.83                         | 0.85                      | 0.23                     | 0.04                       | 0.94                        |
| 6  | 1987050100  | initial    | 0.76                         | 0.45                      | 0.35                     | 0.36                       | 0.58                        |
|    |             | optimized  | 0.93                         | 0.76                      | 0.10                     | 0.05                       | 1.01                        |
| 7  | 19880516200 | initial    | 0.54                         | 0.58                      | 0.26                     | 0.42                       | 0.82                        |
|    |             | optimized  | 0.84                         | 0.80                      | 0.15                     | 0.04                       | 0.90                        |
| 8  | 1989042600  | initial    | 0.52                         | 0.55                      | 0.55                     | 0.25                       | 0.62                        |
|    |             | optimized  | 0.64                         | 0.74                      | 0.39                     | 0.02                       | 0.88                        |
| 9  | 1990050100  | initial    | 0.55                         | 0.64                      | 0.42                     | 0.23                       | 0.55                        |
|    |             | optimized  | 0.85                         | 0.87                      | 0.14                     | 0.03                       | 0.85                        |
| 10 | 1991053118  | initial    | 0.63                         | 0.62                      | 0.40                     | 0.18                       | 0.68                        |
|    |             | optimized  | 0.80                         | 0.76                      | 0.25                     | 0.04                       | 0.95                        |
| 11 | 1992042900  | initial    | 0.48                         | 0.59                      | 0.35                     | 0.34                       | 0.65                        |
|    |             | optimized  | 0.66                         | 0.84                      | 0.20                     | 0.11                       | 0.89                        |
| 12 | 1993060900  | initial    | 0.75                         | 0.65                      | 0.38                     | 0.28                       | 0.84                        |
|    |             | optimized  | 0.91                         | 0.89                      | 0.24                     | 0.09                       | 1.05                        |
| 13 | 1994060700  | initial    | 0.78                         | 0.64                      | 0.32                     | 0.26                       | 1.25                        |
|    |             | optimized  | 0.93                         | 0.85                      | 0.14                     | 0.04                       | 0.85                        |
| 14 | 1995052100  | initial    | 0.68                         | 0.48                      | 0.42                     | 0.35                       | 0.65                        |
|    |             | optimized  | 0.82                         | 0.70                      | 0.20                     | 0.01                       | 0.81                        |
| 15 | 1996060600  | initial    | 0.74                         | 0.65                      | 0.25                     | 0.23                       | 0.54                        |
|    |             | optimized  | 0.90                         | 0.93                      | 0.18                     | 0.02                       | 0.86                        |
| 16 | 1997060400  | initial    | 0.65                         | 0.51                      | 0.23                     | 0.26                       | 0.65                        |
|    |             | optimized  | 0.84                         | 0.87                      | 0.13                     | 0.06                       | 0.95                        |
| 17 | 1998051600  | initial    | 0.57                         | 0.62                      | 0.35                     | 0.18                       | 0.68                        |
|    |             | optimized  | 0.83                         | 0.85                      | 0.30                     | 0.01                       | 1.05                        |
| 18 | 1999061700  | initial    | 0.48                         | 0.59                      | 0.33                     | 0.15                       | 0.55                        |
|    |             | optimized  | 0.60                         | 0.83                      | 0.15                     | 0.05                       | 0.80                        |
| 19 | 2000052100  | initial    | 0.67                         | 0.62                      | 0.45                     | 0.25                       | 0.58                        |
|    |             | optimized  | 0.79                         | 0.89                      | 0.26                     | 0.06                       | 0.83                        |

|         |            |           |      |      |      |      |      |
|---------|------------|-----------|------|------|------|------|------|
| 20      | 2001051500 | initial   | 0.62 | 0.56 | 0.32 | 0.22 | 0.68 |
|         |            | optimized | 0.80 | 0.82 | 0.25 | 0.07 | 0.82 |
| 21      | 2002042600 | initial   | 0.68 | 0.65 | 0.38 | 0.18 | 0.57 |
|         |            | optimized | 0.86 | 0.90 | 0.24 | 0.02 | 0.87 |
| 22      | 2003060600 | initial   | 0.75 | 0.55 | 0.25 | 0.26 | 0.55 |
|         |            | optimized | 0.92 | 0.85 | 0.14 | 0.04 | 0.76 |
| 23      | 2004070300 | initial   | 0.58 | 0.68 | 0.38 | 0.27 | 0.68 |
|         |            | optimized | 0.78 | 0.82 | 0.23 | 0.08 | 0.85 |
| 24      | 2005061400 | initial   | 0.65 | 0.62 | 0.52 | 0.32 | 0.65 |
|         |            | optimized | 0.76 | 0.76 | 0.35 | 0.06 | 0.74 |
| 25      | 2006060400 | initial   | 0.68 | 0.72 | 0.62 | 0.35 | 0.53 |
|         |            | optimized | 0.82 | 0.83 | 0.30 | 0.10 | 0.86 |
| 26      | 2009060908 | initial   | 0.75 | 0.78 | 0.25 | 0.23 | 1.22 |
|         |            | optimized | 0.95 | 0.92 | 0.17 | 0.04 | 0.09 |
| 27      | 2011010100 | initial   | 0.66 | 0.75 | 0.35 | 0.55 | 1.66 |
|         |            | optimized | 0.80 | 0.84 | 0.26 | 0.03 | 1.02 |
| 28      | 2012010100 | initial   | 0.63 | 0.68 | 0.34 | 0.22 | 1.42 |
|         |            | optimized | 0.82 | 0.79 | 0.20 | 0.05 | 0.80 |
| 29      | 2013010100 | initial   | 0.78 | 0.65 | 0.31 | 0.32 | 1.35 |
|         |            | optimized | 0.95 | 0.82 | 0.20 | 0.06 | 0.92 |
| average |            | initial   | 0.64 | 0.62 | 0.37 | 0.29 | 0.78 |
|         |            | optimized | 0.82 | 0.83 | 0.22 | 0.05 | 0.87 |

613

614

615

616 Table 5 Grid cell numbers with different model spatial resolution

| Model resolution | Number of grid cells | Number of hill slope cells | Number of river cells |
|------------------|----------------------|----------------------------|-----------------------|
| 200m*200m        | 1469900              | 1463204                    | 6696                  |
| 400m*400m        | 367475               | 365801                     | 1674                  |
| 500m*500m        | 235184               | 234113                     | 1071                  |
| 600m*600m        | 163322               | 162578                     | 744                   |
| 1000m*1000m      | 58796                | 58528                      | 268                   |

617

618

619

622 Table 6 Optimized parameters with different model spatial resolution\*

|            |                                          |                              |                     |                                  |                       |                           |
|------------|------------------------------------------|------------------------------|---------------------|----------------------------------|-----------------------|---------------------------|
| Resolution | Soil saturated hydraulic conductivity/ks | Slope roughness              | Manning coefficient | Soil layer thickness/Zs          | b                     | The river bottom slope/Bs |
|            | 1.33                                     | 0.66                         | 1.19                | 1.42                             | 0.67                  | 0.75                      |
| 200m       | The river bottom width/Bw                | Saturated water content/Csat | Field Capacity/Cfc  | Evapotranspiration coefficient/v | Wilting percentage/Cw | Side slope grade/Ss       |
|            | 1.24                                     | 1.11                         | 1.2                 | 0.94                             | 0.68                  | 1.42                      |
| 400m       | Soil saturated hydraulic conductivity/ks | Slope roughness              | Manning coefficient | Soil layer thickness/Zs          | b                     | The river bottom slope/Bs |
|            | 0.75                                     | 1.12                         | 1.23                | 1.4                              | 1.25                  | 0.65                      |
| 400m       | The river bottom width/Bw                | Saturated water content/Csat | Field Capacity/Cfc  | Evapotranspiration coefficient/v | Wilting percentage/Cw | Side slope grade/Ss       |
|            | 0.89                                     | 1.02                         | 1.22                | 1.18                             | 1.15                  | 0.76                      |
| 500m       | Soil saturated hydraulic conductivity/ks | Slope roughness              | Manning coefficient | Soil layer thickness/Zs          | b                     | The river bottom slope/Bs |
|            | 0.67                                     | 1.47                         | 1.49                | 1.37                             | 1.5                   | 0.51                      |
| 500m       | The river bottom width/Bw                | Saturated water content/Csat | Field Capacity/Cfc  | Evapotranspiration coefficient/v | Wilting percentage/Cw | Side slope grade/Ss       |
|            | 0.91                                     | 1.16                         | 1.41                | 1.37                             | 1.37                  | 0.5                       |
| 600m       | Soil saturated hydraulic conductivity/ks | Slope roughness              | Manning coefficient | Soil layer thickness/Zs          | b                     | The river bottom slope/Bs |
|            | 1.02                                     | 0.98                         | 1.24                | 0.95                             | 1.21                  | 0.86                      |

|       |                                          |                              |                     |                                  |                       |                           |
|-------|------------------------------------------|------------------------------|---------------------|----------------------------------|-----------------------|---------------------------|
|       | The river bottom width/Bw                | Saturated water content/Csat | Field Capacity/Cfc  | Evapotranspiration coefficient/v | Wilting percentage/Cw | Side slope grade/Ss       |
|       | 1.12                                     | 0.87                         | 1.28                | 1.08                             | 1.16                  | 0.95                      |
|       | Soil saturated hydraulic conductivity/ks | Slope roughness              | Manning coefficient | Soil layer thickness/Zs          | b                     | The river bottom slope/Bs |
| 1000m | 0.5                                      | 1.43                         | 1.17                | 1.11                             | 1.47                  | 0.57                      |
|       | The river bottom width/Bw                | Saturated water content/Csat | Field Capacity/Cfc  | Evapotranspiration coefficient/v | Wilting percentage/Cw | Side slope grade/Ss       |
|       | 1.1                                      | 0.76                         | 0.53                | 0.6                              | 1.5                   | 0.54                      |

623 \*Values in the table are adjusting coefficient of the optimized parameters to the initial  
624 parameters, so values of the final optimized parameters are initial parameters time adjusting  
625 coefficient.

626

- 628 [1] Abbott, M.B. et al.: An Introduction to the European Hydrologic System-System Hydrologue European,  
629 'SHE', a: History and Philosophy of a Physically-based, Distributed Modelling System, Journal of  
630 Hydrology, 87, 45-59, 1986.
- 631 [2] Abbott, M.B. et al.: An Introduction to the European Hydrologic System-System Hydrologue European,  
632 'SHE', b: Structure of a Physically based, distributed modeling System, Journal of Hydrology, 87, 61-77,  
633 1986.
- 634 [3] Ambrose, B., Beven, K., and Freer, J.: Toward a generalization of the TOPMODEL concepts: Topographic  
635 indices of hydrologic similarity, Water Resour. Res., 32, 2135-2145, 1996.
- 636 [4] Anderson, A. N., McBratney, A. B., and FitzPatrick, K. E. A soil mass, surface and spectral fractal dimensions  
637 estimated from thin section photographs. Soil Sci. Soc. Am. J., 60, 962-969, 1996.
- 638 [5] Arya, L.M., and J.F. Paris. 1981. A physioempirical model to predict the soil moisture characteristic from  
639 particle-size distribution and bulk density data. Soil Sci. Soc. Am. J. 45, 1023-1030.
- 640 [6] Bartholmes, J.C., Thielen, J., Ramos, M.H., Gentilini, S., 2009. The european flood alert system EFAS e part  
641 2: statistical skill assessment of probabilistic and deterministic operational forecasts. Hydrol. Earth Syst. Sci.  
642 13 (2), 141e153.
- 643 [7] Burnash, R. J. C., 1995. "The NWS river forecast system-catchment modeling." Computer models of  
644 watershed hydrology, V. P. Singh, ed., Water Resource Publications, Littleton, Colo., 311-366.
- 645 [8] Catto  n, C  dine, Hilary McMillan, and Stuart Moore. Coupling a high-resolution weather model with a  
646 hydrological model for flood forecasting in New Zealand[J]. Journal of Hydrology (NZ), 2016,55 (1): 1-23.
- 647 [9] Chen, Xiuwan, Analysis on flood disasters in China, 1995. Marine Geology and Quaternary Geology,  
648 15(3):161-168.
- 649 [10] Chen, Huiquan, Mao Shimin. Calculation and Verification of an Universal Water Surface Evaporation  
650 Coefficient Formula[J]. Advances in Water Science, 1995, 6(2):116-120.
- 651 [11] Chen, Yangbo. Liuxihe Model, China Science and Technology Press, September 2009.
- 652 [12] Chen, Yangbo, Ren, Q.W., Huang, F.H., Xu, H.J., and Cluckie, I.: Liuxihe Model and its modeling to river  
653 basin flood, Journal of Hydrologic Engineering, 16, 33-50, 2011.
- 654 [13] Chen, Yangbo, Yi Dong, Pengcheng Zhang. Study on the method of flood forecasting of small and medium  
655 sized catchment, proceeding of the 2013 annual meeting of the Chinese Society of Hydraulic Engineering,  
656 1001-1008, 2013.
- 657 [14] Chen, Yangbo, Ji Li, Huijun Xu. Improving flood forecasting capability of physically based distributed  
658 hydrological model by parameter optimization. Hydrology & Earth System Sciences, 20, 375-392, 2016.
- 659 [15] Dibike, Y. B., P. Coulibaly. Hydrologic impact of climate change in the Saguenay watershed: comparison of  
660 downscaling methods and hydrologic models[J]. Journal of Hydrology, 2005, 307(1-4): 145-163.
- 661 [16] EEA, 2010. Mapping the Impacts of Natural Hazards and Technological Accidents in Europe: an Overview  
662 of the Last Decade. EEA Technical Report. European Environment Agency, Copenhagen, p. 144.
- 663 [17] Falorni, G., Teles, V., Vivoni, E. R., Bras, R. L., and Amaratunga, K. S.: Analysis and characterization of the  
664 vertical accuracy of digital elevation models from the Shuttle Radar Topography Mission, J. Geophys. Res.  
665 F-Earth Surf., 110, F02005, doi:10.1029/2003JF000113, 2005.
- 666 [18] Freeze, R. A., and Harlan, R.L.: Blueprint for a physically-based, digitally simulated, hydrologic response  
667 model, Journal of Hydrology, 9, 237-258, 1969.
- 668 [19] Grayson, R.B., Moore, I. D., and McMahon, T.A.: Physically based hydrologic modeling: I. A Terrain-based  
669 model for investigative purposes, Water Resources Research, 28, 2639-2658, 1992.
- 670 [20] Guo, Hanqing, Hua Youzhi, Bai Xiumei. Hydrological Effects of Litter on Different Forest Stands and Study  
671 about Surface Roughness Coefficient[J]. Journal of Soil and Water Conservation, 2010, 24(2): 179-183
- 672 [21] Jensen, S. K. and J. O. Domingue, 1988, Extracting Topographic Structure from Digital Elevation Data for  
673 Geographic Information System Analysis, Photogrammetric Engineering and Remote Sensing, 54(11)
- 674 [22] Jia, Y., Ni, G., and Kawahara, Y.: Development of WEP model and its application to an urban watershed,  
675 Hydrological Processes, 15, 2175- 2194, 2001.
- 676 [23] Julien, P.Y., Saghafian, B., and Ogden, F. L.: Raster-Based Hydrologic Modeling of spatially-Variied Surface  
677 Runoff, Water Resources Bulletin, 31, 523-536, 1995.
- 678 [24] Kauffeldt, A., F. Wetterhall, F. Pappenberger, P. Salamon, J. Thielen. Technical review of large-scale  
679 hydrological models for implementation in operational flood forecasting schemes on continental level[J].  
680 Environmental Modelling & Software, 2016, 75: 68-76.
- 681 [25] Kavvas, M., Chen, Z., Dogrul, C., Yoon, J., Ohara, N., Liang, L., Aksoy, H., Anderson, M., Yoshitani, J.,  
682 Fukami, K., and Matsuura, T. (2004). "Watershed Environmental Hydrology (WEHY) Model Based on  
683 Upscaled Conservation Equations: Hydrologic Module." J. Hydrol. Eng.,  
684 10.1061/(ASCE)1084-0699(2004)9:6(450), 450-464.
- 685 [26] Kouwen, N.: WATFLOOD: A Micro-Computer based Flood Forecasting System based on Real-Time  
686 Weather Radar, Canadian Water Resources Journal, 13, 62-77, 1988.
- 687 [27] Krzmm, R. W. The Federal Role in Natural Disasters. International Symposium on Torrential Rain and  
688 Flood, Oct 5-9, 1992, Huangshan, China.
- 689 [28] Kuniyoshi, T. Japanese Experiences of Combating Against Floods in the past half century. International  
690 Symposium on Torrential Rain and Flood, Oct 5-9, 1992, Huangshan, China.

- 691 [29] Li, Y., C. Wang. Impacts of urbanization on surface runoff of the Dardenne Creek watershed, St. Charles  
692 County, Missouri[J]. *Phys. Geogr.* 2009, 30(6):556-573.
- 693 [30] Li, Yuting, Zhang Jianjun, Ri Hao, et al. Effect of Different Land Use Types on Soil Anti-scourability and  
694 Roughness in Loess Area of Western Shanxi Province[J]. *Journal of Soil and Water Conservation*, 2013,  
695 27(4):1-6.
- 696 [31] Liang, X., Lettenmaier, D.P., Wood, E.F., and Burges, S.J.:A simple hydrologically based model of land  
697 surface water and energy fluxes for general circulation models, *J. Geophys. Res.*, 99,14415-14428,1994.
- 698 [32] Liao, Zhenghong, Yangbo Chen, Xu Huijun, Yan Wanling, Ren Qiwei, Parameter Sensitivity Analysis of the  
699 Liuxihe Model Based on E-FAST Algorithm, *Tropical Geography*, 2012, 32(6):606-612.
- 700 [33] Liao, Zhenghong, Yangbo Chen, Xu Huijun, He Jinxiang, Study of Liuxihe Model for flood forecast of  
701 Tiantoushui Watershed, Yangtze River, 2012, 43(20): 12-16.
- 702 [34] Lohmann, D., Raschke, E., Nijssen, B., Lettenmaier, D. P. (1998). Regional scale hydrology: II. Application  
703 of the VIC-2L model to the Weser River, Germany, *Hydrological Sciences Journal*, 43:1, 143-158.
- 704 [35] Loveland, T. R., Merchant, J. W., Ohlen, D. O., and Brown, J. F.:Development of a Land Cover  
705 Characteristics Data Base for the Conterminous U.S., *Photogram. Eng. Remote Sens.*, 57, 1453–1463, 1991.
- 706 [36] Loveland, T. R., Reed, B. C., Brown, J. F., Ohlen, D. O., Zhu, J., Yang, L., and Merchant, J. W.:  
707 Development of a Global Land Cover Characteristics Database and IGBP DISCover from 1-km AVHRR  
708 Data, *Int. J. Remote Sens.*, 21, 1303–1330, 2000.
- 709 [37] Madsen, H.:Parameter estimation in distributed hydrological catchment modelling using automatic  
710 calibration with multiple objectives, *Advances in Water Resources*, 26,205-216, 2003.
- 711 [38] Olivera, F., B. B. DeFee. Urbanization and its effect on runoff in the Whiteoak Bayou Watershed, Texas[J]. *J.*  
712 *Am. Water Resour. Assoc.* , 2007, 43(1):170-182.
- 713 [39] Ott, B., Uhlenbrook S. Quantifying the impact of land-use changes at the event and seasonal time scale using  
714 a process-oriented catchment model[J]. *Hydrol Earth Syst Sci.* ,2004, 8:62-78.
- 715 [40] Refsgaard, J. C.,1997. “Parameterisation, calibration and validation of distributed hydrological models.” *J.*  
716 *Hydrol.*, 198, 69–97.
- 717 [41] Rose, Seth Norman E. Peters. Effects of urbanization on streamflow in the Atlanta area (Georgia, USA): a  
718 comparative hydrological Approach[J]. *Hydrological Processes*, 2001, 15(8):1141-1157.
- 719 [42] Rwetabula, J., F. De Smedt, M. Rebhun. Prediction of runoff and discharge in the Simiyu River (tributary of  
720 Lake Victoria, Tanzania) using the WetSpa model. *Hydrology and Earth System Sciences Discussions*,  
721 *European Geosciences Union*, 2007, 4 (2):881-908.
- 722 [43] Shafii, M. and Smedt, F. De: Multi-objective calibration of a distributed hydrological model (WetSpa) using  
723 a genetic algorithm, *Hydrol. Earth Syst. Sci.*, 13, 2137–2149, 2009.
- 724 [44] Sharma, A. Tiwari, K. N.: A comparative appraisal of hydrological behavior of SRTM DEM at catchment  
725 level, *J. Hydrol.*, 519, 1394–1404, 2014.
- 726 [45] Shen, Shengqiong, Shuanghe, Guze. Conversion Coefficient between Small Evaporation Pan and  
727 Theoretically Calculated Water Surface Evaporation in China[J].*Journal of Nanjing Institute of Meteorology*,  
728 2007, 30(4):561-565.
- 729 [46] Sood, A., Smakhtin, V., 2015. Global hydrological models: a review. *Hydrol. Sci. J.* 60(4), 549e565.  
730 <http://dx.doi.org/10.1080/02626667.2014.950580>.
- 731 [47] Stisen, Simon, Jensen, Karsten H., Inge Sandholt , David I.F. Grimes. A remote sensing driven distributed  
732 hydrological model of the Senegal River basin, *Journal of Hydrology*, 2008(354):131-148.
- 733 [48] Strahler, A. N.Quantitative analysis of watershed Geomorphology, *Transactions of the American Geophysical*  
734 *Union*, 1957, 35(6), 913-920.
- 735 [49] Sugawara, M. \_1995\_. “Tank model.” *Computer models of watershed hydrology*, V. P. Singh, ed., *Water*  
736 *Resources Publications*, Littleton, Colo., 165–214.
- 737 [50] Thielen, J., Bartholmes, J., Ramos, M.H., de Roo, A., 2009. The European flood alert system e part 1:  
738 concept and development. *Hydrol. Earth Syst. Sci.* 13 (2), 125-140.
- 739 [51] Thielen, J., Pappenberger, F., Salamon, P., Bogner, K., Burek, P., de Roo, A., 2010. The State of the Art of  
740 Flood Forecasting–Hydrological Ensemble Prediction Systems, p. 145.
- 741 [52] Todini, E., 1996. “The ARNO rainfall-runoff model.” *J. Hydrol.*, 175, 339–382.
- 742 [53] Vanrheenen, N. T., A W Wood, R N Palmer, et al. Potential implications of PCM climate change scenarios for  
743 Sacramento-San Joaquin River Basin hydrology and water resources[J]. *Climatic Change*, 2004, 62(1-3):  
744 257-281.
- 745 [54] Vieux, B. E., and Vieux, J. E.:VfloTM: A Real-time Distributed Hydrologic Model[A]. In:Proceedings of the  
746 2nd Federal Interagency Hydrologic Modeling Conference, July 28-August 1, Las Vegas, Nevada. Abstract  
747 and paper on CD-ROM, 2002.
- 748 [55] Vieux, B.E., Moreda, F.G.:Ordered physics-based parameter adjustment of a distributed model. In: Duan, Q.,  
749 Sorooshian, S., Gupta, H.V., Rousseau, A.N., Turcotte, R. (Eds.), *Advances in Calibration of Watershed*  
750 *Models. Water Science and Application Series*, vol. 6. American Geophysical Union, pp. 267-281, 2003
- 751 [56] Vieux, B.E., Cui Z., Gaur A.: Evaluation of a physics-based distributed hydrologic model for flood  
752 forecasting, *Journal of Hydrology*, 298, 155-177, 2004.
- 753 [57] Vivoni, E.R., Ivanov, V.Y., Bras, R.L. and Entekhabi, D. 2004. Generation of Triangulated Irregular  
754 Networks based on Hydrological Similarity. *Journal of Hydrologic Engineering*. 9(4): 288-302.
- 755 [58] Wang, Z., Batelaan, O., De Smedt, F.: A distributed model for water and energy transfer between soil, plants  
756 and atmosphere (WetSpa). *Journal of Physics and Chemistry of the Earth* 21, 189-193, 1997.

- 757 [59] Wigmosta, M. S., Vai, L. W., and Lettenmaier, D. P.: A Distributed Hydrology-Vegetation Model for  
758 Complex Terrain, *Water Resources Research*, 30,1665-1669,1994.
- 759 [60] Witold F. Krajewski, Daniel Ceynar, Ibrahim Demir, Radoslaw Goska, Anton Kruger, Carmen Langel,  
760 Ricardo Mantilla, James Niemeier, Felipe Quintero, Bong-Chul Seo, Scott J. Small, Larry J. Weber, and  
761 Nathan C. Young. Real-time Flood Forecasting and Information System for the State of Iowa[J] *Bull.*  
762 *Amer.Meteor. Soc.* doi:10.1175/BAMS-D-15-00243.1, in press.
- 763 [61] Xu, Huijuna, Yangbo Chen, Zeng Biqiu, He Jinxiang, Liao Zhenghong, Application of SCE-UA Algorithm  
764 to Parameter Optimization of Liuxihe Model, *Tropical Geography*, 2012.1, 32(1): 32-37.
- 765 [62] Xu, Huijun, Yangbo Chen, Li Zhouyang, He Jinxiang, Analysis on parameter sensitivity of distributed  
766 hydrological model based on LH-OAT Method, *Yangtze River*, 2012, 43(7): 19-23.
- 767 [63] Yang, D., Herath ,S. and Musiaka, K.:Development of a geomorphologic properties extracted from DEMs  
768 for hydrologic modeling, *Annual journal of Hydraulic Engineering*, JSCE, 47,49-65,1997.
- 769 [64] Zaradny, H. *Groundwater Flow in Saturated and Unsaturated Soil*. Now York:A A BalKema,1993.
- 770 [65] Zhang, Shaohui, Xu Di, Li Yinong, et al. An optimized inverse model used to estimate Kostikov infiltration  
771 parameters and Manning's roughness coefficient based on SGA and SRFR model: I Establishment[J]. *Shuili*  
772 *Xuebao*, 2006, 37(11):1297-1302.
- 773 [66] Zhang, Shaohui, Xu Di, Li Yinong, et al. Optimized inverse model used to estimate Kostikov infiltration  
774 parameters and Manning's roughness coefficient based on SGA and SRFR model: II Application[J]. *Shuili*  
775 *Xuebao*, 2007, 38(4):402-408.
- 776 [67] Zhang, Mengze, Liu Yuanhong, Wang Lingru, et al. Inversion on Channel Roughness for Hydrodynamic  
777 Model by Using Quantum-Behaved Particle Swarm Optimization[J]. *Yellow River*, 2015, 37(2):26-29
- 778 [68] Zhao, R. J.,1977. Flood forecasting method for humid regions of China, East China College of Hydraulic  
779 Engineering, Nanjing, China.
