# Supplementary material for: Large watershed flood forecasting with high resolution distributed hydrological model
Source: Copernicus journal article supplement (doi:10.5194/hess-2016-489), 2016-09-26
Supplement: Supplementary file [file hess-2016-489-RC2-supplement.pdf]

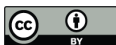

1                   **Large watershed flood forecasting with high resolution**  
2                   **distributed hydrological model**

3                   Yangbo Chen<sup>1</sup>, Ji Li<sup>1</sup>, Huanyu Wang<sup>1</sup>, Jianming Qin<sup>1</sup>, Liming Dong<sup>1</sup>

4  
5                   <sup>1</sup>Department of Water Resources and Environment, Sun Yat-sen University,  
6                   Guangzhou 510275, China

7  
8                   *Correspondence to:* Yangbo Chen (eescyb@mail.sysu.edu.cn)  
9

10                   **Abstract:**  ~~Flooding is one of the most devastating natural disasters in the world with~~  
11                    ~~huge damages, and flood forecasting is one of the flood mitigation measurements.~~  
12                    ~~Watershed hydrological model is the major tool for flood forecasting, although the~~  
13                    ~~lumped watershed hydrological model is still the most widely used model, the~~  
14                    ~~distributed hydrological model has the potential to improve watershed flood~~  
15                    ~~forecasting capability.~~ Distributed hydrological model has been successfully used in  
16                   small watershed flood forecasting, but there are still challenges for the application in  
17                   large watershed, one of them is the model's spatial resolution effect. To cope with this  
18                   challenge, two efforts could be made, one is to improve the model's computation  
19                   efficiency in large watershed, another is implementing the model on high performance  
20                   supercomputer.  ~~By employing Liuxihe Model, a physically based distributed~~  
21                    ~~hydrological model, this~~ study sets up a distributed hydrological model for the flood  
22                   forecasting of  ~~Liujiang River Basin in southern China that is a large watershed.~~  
23                   Terrain data  ~~including~~ DEM, soil  ~~type~~ and land use  ~~type~~ are downloaded from the  
24                   website freely, and the model structure with a high resolution of 200m\*200m grid cell  
25                   is set up. The initial model parameters are derived from the terrain property data, and  
26                   then optimized by using the PSO algorithm, the model is used to simulate 29 observed  
27                   flood events. It has been found that by dividing the river channels into virtual channel  
28                   sections and assuming the cross section shapes as trapezoid, the Liuxihe Model  
29                   largely increases computation efficiency while keeping good model performance, thus  
30                   making it applicable in larger watersheds. This study also finds that parameter

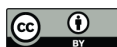

31 uncertainty exists for physically deriving model parameters, and parameter  
32 optimization could reduce this uncertainty, and is highly recommended. Computation  
33 time needed for running a distributed hydrological model increases exponentially at a  
34 power of 2, not linearly with the increasing of model spatial resolution, and the  
35 200m\*200m model resolution is proposed for modeling Liujiang River Basin flood  
36 with Liuxihe Model in this study. To keep the model with an acceptable performance,  
37 minimum model spatial resolution is needed. The suggested threshold model spatial  
38 resolution for modeling Liujiang River Basin flood is 500m\*500m grid cell, but the  
39 model spatial resolution at 200m\*200m grid cell is recommended in this study to keep  
40 the model a better performance.

41 **Key words:** watershed flood forecasting, distributed hydrological model, Liuxihe  
42 Model, parameter optimization, model spatial resolution

43

## 44 **1 Introduction**

45 Flooding is one of the most devastating natural disasters in the world, and huge  
46 damages has been caused (Krzmm, 1992, Kuniyoshi, 1992, Chen, 1995, EEA, 2010).  
47 Flood forecasting is one of the most widely used flood mitigation measurements, and  
48 watershed hydrological model is the major tool for flood forecasting. Currently the  
49 most popular hydrological model for watershed flood forecasting is still the so-called  
50 lumped model (Refsgaard et. al., 1996), which averages the terrain property and  
51 precipitation over the watershed, so do the model parameters. Hundreds of lumped  
52 models have been proposed and widely used, such as the Sacramento model proposed  
53 by Burnash et. al. (1995), the Tank model proposed by Sugawara et. al. (1995), the  
54 Xinanjiang model proposed by Zhao (1977), and the ARNO model proposed by  
55 Todini (1996), only naming a few among others. It is widely accepted that the  
56 precipitation for driving the watershed hydrological processes is usually unevenly  
57 distributed over the watershed, particularly for the large watershed, so the lumped  
58 model could not easily forecast the watershed flooding of large watersheds.

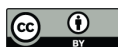

59 Furthermore, due to the inhomogeneity of terrain property over the watershed, which  
60 is true even in very small watershed, so the watershed flood forecasting could not be  
61 forecasted accurately if the model parameters are averaged over the watershed. For  
62 this reasons, new models are needed to improve the watershed flood forecasting  
63 capability, particularly for large watershed flood forecasting.

64

65 Development of distributed hydrological model in the past decades provides the  
66 potential to improve watershed flood forecasting capability. One of the most  
67 important features of the distributed hydrological model is that it divides watershed  
68 terrain into grid cells, which are regarded to have the same meaning of a real  
69 watershed, i.e., the grid cells have their own terrain properties and precipitation. The  
70 hydrological processes are calculated at both the grid cell scale and the watershed  
71 scale, and the parameters used to calculate hydrological processes are also different at  
72 different grid cells. This feature makes it could describe the inhomogeneity of both  
73 the terrain property and precipitation over watershed. The distributed feature of the  
74 distributed hydrological model is a very important feature compared to lumped model,  
75 which makes it could better simulate the watershed hydrological processes at all scale,  
76 small or large. The inhomogeneity of precipitation over watershed could also be well  
77 described in the model, this is very helpful in modeling large watershed hydrological  
78 processes, particularly in the tropical and sub-tropical regions where the flooding is  
79 driven by heavy storm. For this reason, distributed hydrological model is usually  
80 regarded to have the potential to better simulate or forecast the watershed flood  
81 (Ambrose et. al., 1996, Chen et. al., 2016). Employing distributed hydrological  
82 model for watershed food forecasting has been a new trend(Vieux et. al., 2004, Chen  
83 et. al., 2012, Cđine Catto ãn et. al., 2016, Witold et. al., 2016, Kauffeldt et. al., 2016).

84

85 The blueprint of distributed hydrological model is regarded to be proposed by Freeze  
86 and Harlan (1969), the first distributed hydrological model was the SHE model  
87 proposed by Abbott et. al. (1986a, 1986b). Distributed hydrological model requires



88 different terrain property data for every grid cells to set up the model structure, so it is  
89 data driven model. In the early stage of distributed hydrological modeling, this posted  
90 great challenge for distributed hydrological model's application as the data was not  
91 widely available and inexpensively accessible. With the development of remote  
92 sensing sensors and techniques, terrain data covering global range with high  
93 resolution has got readily available and could be acquired inexpensively. For example,  
94 the DEM at 30m grid cell resolution with global coverage could be freely downloaded  
95 (Falorni et al., 2005, Sharma et. al., 2014), which largely pushes forward the  
96 development and application of the distributed hydrological models. After that, many  
97 distributed hydrological models have been proposed, such as the WATERFLOOD  
98 model (Kouwen, 1988), THALES model (Grayson et al., 1992), VIC model (Liang et.  
99 al., 1994), DHSVM model (Wigmosta et. al., 1994), CASC2D model (Julien et. al.,  
100 1995), WetSpa model (Wang et. al., 1997), GBHM model (Yang et. al., 1997), WEP-L  
101 model (Jia et. al., 2001), Vflo model (Vieux et. al., 2002), tRIBS model(Vivoni et. al.,  
102 2004), WEHY model (Kavvas et al., 2004), Liuxihe model (Chen et. al., 2011, 2016),  
103 and more.

104

105 Distributed hydrological model derives model parameters physically from the terrain  
106 property data, and is regarded not need to calibrate model parameter, so it could be  
107 used in data poor or ungauged basins. This feature of distributed hydrological model  
108 made it applied widely in evaluating the impacts of climate changes and urbanization  
109 on hydrology(Li et. al., 2009, Seth et. al., 2001, Ott, et. al., 2004, Vanrheenen et. al.,  
110 2005, Olivera et. al., 2007). But it also was found that this feature caused parameter  
111 uncertainty due to the lack of experiences and references in physically deriving model  
112 parameters from the terrain property, so could not be used in fields that require high  
113 flood simulated accuracy, including watershed flood forecasting. It was realized that  
114 parameter optimization for distributed hydrological model is also needed to improve  
115 the model's performance, and a few methods for optimizing parameters of distributed  
116 hydrological model have been proposed. For example, Vieux et. al. (2003) tried a



117 so-called scalar method to adjust the model parameters, and the model performance is  
118 found to be improved largely. Madsen et. al. (2003) proposed an automatic  
119 multi-objective parameter optimization method with SCE algorithm for SHE model,  
120 which improved the model performance also. Shafii et. al. (2009) proposed a  
121 multi-objective genetic algorithm for optimizing parameters of WetSpa model, the  
122 improved model result is regarded to be reasonable. Xu et. al. (2012) proposed an  
123 automated parameter optimization method with SCE-UA algorithm for Liuxihe Model,  
124 which improved the model performance in a small watershed flood forecasting. Chen  
125 et. al. (2016) proposed an automated parameter optimization method based on PSO  
126 algorithm for Liuxihe Model watershed flood forecasting, and tested in two watershed,  
127 one is small, one is large. The results suggested that distributed hydrological model  
128 should optimize model parameters even if there is only little available hydrological  
129 data, while the derived model parameters physically from the terrain property could  
130 serve as an initial parameters. The above progresses in distributed hydrological  
131 model's parameter optimization has matured, and will largely improve the  
132 performance of distributed hydrological model, thus pushing forward the application  
133 of distributed hydrological model in real-time watershed flood forecasting.

134

135 Spatial resolution is a key factor in distributed hydrological modeling. Theoretically if  
136 the spatial resolution of a distributed hydrological model is higher, i.e., the grid cell  
137 size is smaller, the terrain property could be described finer, and the hydrological  
138 processes could be better simulated or forecasted, so the model spatial resolution  
139 should be as high as possible. But on the other hand, higher model spatial resolution  
140 requires higher resolution terrain property data for model setting up which may not be  
141 available in some watersheds. But the most important is that distributed hydrological  
142 model uses complex equations with physical meanings to calculate the hydrological  
143 processes, so it needs much more computation resources than that of lumped model,  
144 and the required computation resources increases exponentially with the increasing of  
145 the model spatial resolution. So in modeling flood processes of a large watershed, the



146 computation time needed for running the distributed hydrological model will be huge  
147 if the model spatial resolution is kept high, which may make the model application  
148 impractical due to high running cost. So if distributed hydrological model is needed to  
149 be applied in large watershed, a coarser resolution is the only choose, and the model's  
150 capability will be impacted with less satisfactory results. This is also called the scaling  
151 effect of distributed hydrological modeling. For this reason, current application for  
152 watershed flood forecasting either limited to small watershed with higher resolution  
153 or coarser resolution in large watershed, i.e., a trade-off between the model  
154 performance and running cost.

155

156 Nowadays forecasting large watershed flooding has been in great demands as it  
157 impacts peoples and their properties at large range, but due to the scale effect, current  
158 distributed hydrological models employed for large watershed are at coarser  
159 resolution, which lowers its capability for flood forecasting and warning. For example,  
160 past application of distributed hydrological model for large watershed flood forecating  
161 are at the resolution coarser than 1km grid cell (Lohmann et. al., 1998, Vieux et. al.,  
162 2004, Stisen et. al., 2008, Rwetabula et. al., 2007), the models employed in the  
163 pan-European Flood Awareness System (EFAS; Bartholmes et. al., 2009, Thielen et.  
164 al., 2009, 2010, Sood et. al., 2015, Kauffeldt et. al., 2016) are at 1-10km grid cell,  
165 which makes the result only applicaple for flood warning.

166

167 Challenge for distributed hydrological model application in large watershed flood  
168 forecasting is its need for huge computation resources, to cope with this challenge,  
169 two efforts could be made. One is to improve the computation efficiency of the  
170 distributed hydrological modeling in large watershed, another is implementing the  
171 model on high performance supercomputer so in the cases that the users are willing to  
172 pay a high computation cost, the flood forecasting of large watershed with high  
173 resolution could be done. In this study, the Liuxihe Model (Chen et. al., 2011, 2016), a  
174 physically based distributed hydrological model proposed for watershed flood



175 forecasting, has been tried for flood forecasting of a large watershed in southern  
176 China to validate the feasibility of distributed hydrological model's application for  
177 large watershed flood forecasting. 

## 178 **2 Studied river basin and data**

### 179 **2.1 Liujiang River Basin**

180 The river basin studied in this paper is the Liujiang River Basin (here after referred to  
181 as LRB) in southern China, which is the first order tributary of the Pearl River. LRB  
182 originates from Village Lang in Guizhou Province, and drains through Guizhou  
183 Province, Guangxi Zhuang Autonomous Region and Hunan Province with 72% of its  
184 drainage area in Guangxi Zhuang Autonomous Region. The length of its main channel  
185 is 1121 km, the total drainage area is 58270 km<sup>2</sup> that marks it a large river basin in  
186 China. ~~Fig. 1 is a sketch map of LRB.~~

187 

188 LRB is a mountainous watershed ~~in southern China~~. There are high mountains in the  
189 north and northwest of the watershed with high elevation, while in its south and  
190 southeast area, the elevation is low. This topography helps forming severe flooding in  
191 the middle and downstream. The basin is in the sub-tropical monsoon climate zone  
192 with an average annual precipitation of 1800 mm, and the precipitation distribution is  
193 highly uneven both at spatial and temporal with 80% of its annual precipitation occurs  
194 in the summer. LRB is in the center of storm zone of Zhuang Autonomous Region,  
195 heavy storm was very frequent in the past. There are 59 ~~disastrous flooding~~ in the past  
196 400 years with recording since 1488, which makes LRB the tributary with most  
197 ~~serious flooding~~ among all the first order tributaries of the Pearl River. In the  
198 watershed, there is no ~~significant flood mitigation project~~ to store flood runoff, so  
199 flood forecasting is one of the most effective ways for the flood management.

### 200 **2.2 Hydrological data**

201 There are 66 rain gauges installed in the watershed. In this study, hydrological data of  
202 30 flood events has been collected, including the precipitation of the rain gauges and



203 the river discharge of Liuzhou river gauge that locates in the downstream of the  
204 watershed and closes to the outlet as shown in Fig. 1 with a hourly step, brief  
205 information of these flood events is listed in Table 1.

206 Table1 Brief information of flood events with data collected in LRB

### 207 **2.3 Terrain property data**

208 Terrain property data includes DEM, land use/cover map and soil map, which are  
209 used for setting up the distributed hydrological model for flood forecasting. In this  
210 study, the DEM was downloaded from the SRTM database (Falorni et al., 2005,  
211 Sharma et. al., 2014), the land use type was downloaded from the USGS land use type  
212 database (Loveland et. al., 1991, Loveland et. al., 2000), and the soil type was  
213 downloaded from FAO soil type database (<http://www.isric.org>). The downloaded  
214 DEM has a spatial resolution of 90m\*90m, considering LRB is large, the running load  
215 for the model with a resolution of 90m\*90m may be too heavy to run in this study, so  
216 the DEM is ~~rescaled to the resolutions of 200m\*200m~~, as shown in Fig. 2(a). The  
217 downloaded land use and soil type were at 1000m\*1000m resolution, so there are  
218 rescaled to the same resolution of DEM, as shown in Fig. 2(b) and Fig. 2 (c)  
219 respectively.

220 Fig. 2 Terrain properties of LRB

221 The highest elevation and the lowest elevation of LRB are 2124 m and 42 m  
222 respectively. There are 9 land use types, including evergreen needle leaved forest,  
223 evergreen broadleaved forest, shrubbery, mountain and alpine meadow, slope  
224 grassland, urban area, river, lakes and cultivated land, accounting for ~~18.1%, 31.0%,~~  
225 ~~32.5%, 0.1%, 13.7%, 0.1%, 0.2%, 0.3% and 4%~~ of the total drainage area respectively.  
226 ~~Forestry, including evergreen needle leaved forest and evergreen broadleaved forest is~~  
227 ~~the major land use type with a percentage of 49.1%, shrubbery occupies a big portion~~  
228 ~~of the watershed also with a percentage of 32.5%, slope grassland also has a~~  
229 ~~significant portion with a percentage of 13.7%, other land use types are very less and~~  
230 ~~are not significant, this means LRB is well vegetated.~~





231

232 There are 11 soil types, including Humicacrisol, Haplic and high activitive acrisol,  
233 Ferralic cambisol, Haplicluvisols, Dystric cambisol, Calcaric regosol, Dystric regosol,  
234 Haplic and weak active acrisol, Artificial accumulated soil, Eutricregosols and Black  
235 limestone soil, Dystric rankers, ~~accounting for 0.8%, 1.5%, 5%, 3.5%, 2.8%, 45.5%,~~  
236 ~~2.9%, 18%, 1.5%, 3.5% and 15% of the total drainage area respectively.~~ Calcaric  
237 ~~regosol is the major soil type which occupies 45.5% of the watershed area, almost half~~  
238 ~~of the drainage area, which is mainly in the east side of the watershed. Haplic and~~  
239 ~~weak active acrisol is another major soil type with an area percentage of 18% and is~~  
240 ~~located in the west side of the watershed. Dystric rankers is also a major soil type with~~  
241 ~~an area percentages of 15% which located in the north side of the watershed. Other~~  
242 ~~soil types are not significant with area percentages below 5% respectively and scatted~~  
243 ~~within the watershed.~~

### 244 **3 Liuxihe Model for LRB flood forecasting**

#### 245 **3.1 Introduction of Liuxihe Model**

246 Liuxihe Model is a physically based distributed hydrological model proposed mainly  
247 for watershed flood forecasting (Chen, 2009, Chen et. al., 2011, 2016). Like other  
248 distributed hydrological models, Liuxihe Model divides the watershed into grid cell  
249 based on the DEM of the studied watershed. To keep a reasonable model performance,  
250 in the past experiences of Liuxihe Model research and application, the model  
251 resolution is limited to 90m\*90m or 100m\*100m, but only used in small watersheds  
252 (Chen, 2009, Chen et. al., 2011, 2013, 2016, Liao et. al., 2012 a, b, Xu et. al., 2012 a,  
253 b). Precipitation, evaporation and runoff production are calculated at cell scale, runoff  
254 routes first on cell, then ~~alone~~ the cell to river channel, and finally to the watershed  
255 outlet. As Liuxihe model is mainly used in the sub-tropical regions, so the runoff  
256 production is calculated based on the ~~saturation-excess mechanism~~. The runoff  
257 routing is classified as hill slope routing, river channel routing, subsurface routing and  
258 underground routing. The hill slope routing is regarded as the one-dimensional  
259 unsteady flow, and ~~the kinematical wave approximation~~ is employed to do the routing.



260 The river channel routing is also regarded as the one-dimensional unsteady flow, but  
261 ~~the diffusive wave approximation~~ is employed to do the routing. The above methods  
262 are widely used in the dominated distributed hydrological models.

263

264 What makes Liuxihe Model ~~different~~ is that the river channel cross section shape is  
265 ~~assumed to be trapezoid~~. With this assumption, the river channel size could be  
266 represented with 3 ~~indices~~, including the bottom width, side slope and bottom slope.  
267 One of the advantages with this assumption is that the river channel cross section size  
268 could be estimated with remotely sensed data, so Liuxihe Model could do river  
269 channel runoff routing real physically, thus making Liuxihe Model a fully distributed  
270 hydrological model. As there are too many river channel cross sections, and many of  
271 them are in the upstream of the watershed where it is not easily accessed, so in real  
272 hydrological modeling, ~~directly measuring the river channel cross section sizes are~~  
273 ~~impractical~~. For this reason, most of the distributed hydrological model could not be  
274 applied in real applications, or simply route the runoff with lumped methods which  
275 makes the model not a fully distributed hydrological model, thus lowering the model's  
276 capability in simulating or forecasting the watershed flood processes. Another  
277 advantage of this assumption is that it also simplifies the runoff routing, thus  
278 improves the model's computation efficiency. For this reason, even Liuxihe Model  
279 has a very high resolution, it still could be used in real-time flood forecasting. This  
280 feature of Liuxihe Model in estimating river channel cross section sizes makes it has  
281 the potential to be used in large watershed flood forecasting.

282

283 Like other distributed hydrological model, when used in ungauged or data poor  
284 watershed flood forecasting, Liuxihe Model derives model parameters physically  
285 from the terrain property data, ~~but automatic parameter optimization methods have~~  
286 ~~been tried~~, and two methods, including the SCE-UA algorithm (Xu et. al, 2012) and  
287 PSO algorithm (Chen et. al., 2016) have been successfully used for Liuxihe Model's  
288 parameter optimization. Study results also suggested that the parameter uncertainty is



289 high for the physically derived model parameters, and if there is a few observed  
290 hydrological processes data, ~~model parameter optimization is recommended that~~  
291 ~~could improves the model performance largely~~, (Chen et. al., 2016). But as automatic  
292 parameter ~~optimization needs thousands model runs~~, that makes it difficult to be used  
293 widely due to huge computing source requirement, which also make it taking long  
294 time in setting up the model. For this reason, a public computer cloud was set up for  
295 optimizing the parameters of Liuxihe Model which employs parallel computation  
296 techniques and was implemented on a supercomputer system(Chen et. al., 2013). With  
297 this development, Liuxihe Model could easily ~~optimize~~ its model parameters.

298

299 Above advancements of Liuxihe Model in estimating river channel cross section sizes  
300 with remotely sensed data, automatic parameters optimization and supercomputing  
301 makes it has the potential to be used in large watershed flood forecasting, so in this  
302 study, the Liuxihe model is employed to study the LRB's flood forecasting.

### 303 **3.2 Liuxihe Model set up**

304 Considering LRB is large, so the DEM with 200m×200m resolution is adopted to set  
305 up the model structure, not at the original 90m×90m resolution. The whole watershed  
306 is first divided into 1469900 cells by the DEM horizontally, which were further  
307 categorized into hill slope cells and river cells. By using Strahler method (Strahler,  
308 1957), the river channel is divided into 3 order system as shown in Fig. 3, which  
309 divides the whole cells into 1463204 hill slope cells and 6696 river cells.

310 Fig. 3 Liuxihe Model structure set up for LRB (200m×200m resolution)

311 To estimate the river channel sizes, 178 virtual nodes were set on the river channel  
312 system, and 225 virtual channel sections were formed as shown in Figure 3. As in  
313 Liuxihe Model, the shape of the virtual channel sections is ~~assumed to be trapezoid~~,  
314 so the cross section size is represented by three ~~indices~~, including bottom width, side  
315 slope and bottom slope. As proposed in Liuxihe Model, the ~~bottom width~~ is estimated  
316 based on the satellite remote sensing imageries. For the side slope, it is a low sensitive



317 data, so it could be estimated based on local experiences. For the bottom slope, it is  
318 calculated with the DEM alone the virtual channel section. As there are too many data  
319 for the virtual cross section sizes, ~~so it is not listed in this paper.~~

### 320 **3.3 Parameter optimization**

321 In Liuxihe Model, an initial parameter set ~~will be~~ derived first based on the terrain  
322 properties, including the DEM, soil type and land use/cover type, then the parameters  
323 will be optimized. In this study, for the insensitive parameter of the land use/cover  
324 related parameters, which is the evaporation coefficient, the initial value is set to be  
325  for all cells based on the experiences. The initial value of roughness, i.e., the  
326 Manning's coefficient, which is the sensitive parameter of the land use/cover related  
327 parameters, is derived from the land use/cover type based on references (Chen et.al.,  
328 1995, Zhang et.al., 2006, 2007, Shen et.al., 2007, Guo et.al., 2010, Li et.al., 2013,  
329 Zhang et.al., 2015), and listed in Table 2.

330 Table 2 The initial values of land use/cover related parameters

331 For the soil related parameters, including the ~~water content at saturation condition, the~~  
332 ~~water content at field condition, the water content at wilting condition, hydraulic~~  
333 ~~conductivity at saturation condition,~~ soil thickness and soil porosity characteristics  
334 coefficient b. Based on past modeling experiences and references (Zaradny, 1993,  
335 Anderson et al., 1996), a value of 2.5 is set to b for all soil type, and the water content  
336 at wilting condition is set to be 30% of the water content at saturation condition. The  
337 soil thickness is estimated based on local experiences and listed in Table 3 for all soil  
338 types. The initial values of the water content at saturation condition, the water content  
339 at field condition and hydraulic conductivity at saturation condition are estimated by  
340 using the Soil Water Characteristics Hydraulic Properties Calculator (Arya et al., 1981)  
341 based on soil texture, organic matter, gravel content, salinity and compaction. The  
342 estimated initial values of soil-related parameters are listed in Table 3.

343 Table 3 The initial values of soil related parameters

344 In Liuxihe Model, Particle Swarm Optimization(PSO) algorithm (Chen et. al., 2016)



345 and SCE-UA algorithm (Xu et. al., 2012) were employed to optimize the initial model  
346 parameters. In this study, PSO algorithm is employed to optimize the initial model  
347 parameters as PSO algorithm has been integrated into the Liuxihe Model Cloud (Chen  
348 et. al., 2013). The number of particles of PSO algorithm is set to 20, while the value  
349 range of inertia weight  $\omega$  is set to 0.1 to 0.9, the value range of acceleration  
350 coefficients C1 is set to 1.25 to 2.75, and C2 to 0.5 to 2.5, and the maximum iteration  
351 is set to 50. Flood event of 20080609 is selected to optimize the parameters of Liuxihe  
352 model, and Fig. 4 shows the result of the parameter optimization. Among them, Fig.  
353 4(a) is the parameters evolving process, Fig. 4(b) is the changing curve of objective  
354 function which is set to minimize the peak flow error, Fig.4(c) is the simulated  
355 hydrograph of flood event 20080609 with the optimized parameters.

356 Fig. 4 Parameter optimization results of Liuxihe Model for LRB with PSO algorithm  
357 From the results in Fig. 4, it could be found that after 14 evolutions, the parameters  
358 optimization process converges to its optimal values, and the optimal parameters are  
359 achieved, the simulated hydrological process of flood event that is used for parameter  
360 optimization is quite good fitting the observed hydrological process, it could be said  
361 that the parameter has a good optimization effect.

362  
363 As mentioned above, the automatic parameter optimization of the distributed  
364 hydrological model is very time consuming. In this study, even supercomputer  
365 is employed with parallel computation techniques, the time used for this parameter  
366 optimization is overwhelming, the total time used for achieving the above optimal  
367 parameters of Liuxihe model for LRB flood forecasting is 220 hours, more than 9  
368 days. Considering several runs are usually needed before achieving the final results,  
369 so the parameter optimization procedure may take a few months, this run time is  
370 really a good investment, but the validation results proves this is worth.

### 371 **3.4 Model validation**

372 The other 29 flood events were simulated by using the Liuxihe model with the above



373 optimized parameters, and the simulated hydrographs of 8 flood events are shown in  
374 Fig. 5, the simulated hydrographs of 8 flood events with initial parameters are also  
375 shown in Fig. 5.

376 Fig. 5 Simulated flood events by Liuxihe Model with optimized parameters

377 From the result of Fig. 5, it has been found that the simulated flood processes fits the  
378 observation reasonable well, particularly the simulated peak flow is quite good, and  
379 the simulated hydrological processes with optimized model parameter improved the  
380 simulated hydrological processes largely. To further analyze the effect of parameter  
381 optimization on model performance improvement, five evaluation indices of the  
382 simulated flood events, including the Nash–Sutcliffe coefficient, the correlation  
383 coefficient, the process relative error, the peak flow error and water balance  
384 coefficient are calculated from the simulated results. Table 4 listed the 5 indices for  
385 both the simulated results with the initial parameters and the optimized parameters.

386 Table 4 Evaluation indices of the simulated flood events

387 From Table 4, it could be seen that the five evaluation indices are quite good for the  
388 simulated hydrological processes with the optimized model parameters. The average  
389 peak flow error is 5% with 14% the maximum. The average Nash–Sutcliffe  
390 coefficient, correlation coefficient, process relative error and water balance coefficient  
391 are 0.82, 0.83, 0.22 and 0.87 respectively, that are also quite good for large river basin  
392 flood simulation. Five evaluation indices of the simulated hydrological processes with  
393 the optimized model parameters are also good improvements to those simulated with  
394 the initial parameters, those are 0.64, 0.62, 0.37, 0.29 and 0.78. There are excellent  
395 improving in all five indices, with the average increases of 0.18, 0.21 and 0.09 of the  
396 average Nash–Sutcliffe coefficient, correlation coefficient and water balance  
397 coefficient respectively, and the average decreases of the peak flow error and process  
398 relative error are 24% and 15% respectively. So it could be concluded that the Liuxihe  
399 Model set up in LRB with optimized parameters are reasonable and could be used for  
400 flood forecasting of LRB. This also implies that parameter optimization of distributed



401 hydrological model could improve model performances, and it should be done when it  
402 is possible.

## 403 **5 Results and discussions**

### 404 **5.1 Computation time vs model resolution**

405 ~~To evaluate the spatial resolution scaling effect of distributed hydrological modeling~~  
406 ~~in LRB, the DEM with 90m\*90m resolution is rescaled to the resolutions of~~  
407 ~~500m\*500m and 1000m\*1000m respectively, the land use and soil type at~~  
408 ~~1000m\*1000m resolution are also rescaled to the same resolutions of the DEM used.~~  
409 ~~Liuxihe models for LRB flood forecasting at 500m\*500m and 1000m\*1000m~~  
410 ~~resolution are set up with the above methods, and the model structures are shown in~~  
411 ~~Fig. 6.~~

412 Fig. 6 Liuxihe Model structure set up for LRB with different resolution

413 With different spatial resolution, the numbers of grid cells, hill slope cells and river  
414 cells are different, but the river channel order are all set to 3, the numbers of virtual  
415 channel nodes for 500m\*500m and 1000m\*1000m resolution models are 68 and 33  
416 respectively, numbers of grid cells, hill slope cells and river cells with different model  
417 resolution are listed in Table 5. , the sizes of every virtual cross sections are measured  
418 with the above method.

419 Table 5 Grid cell numbers with different model spatial resolution

420 From Table 7, it could be seen, number of grid cells of the model with 200m\*200m  
421 resolution is 6.25 times of that with 500m\*500m resolution, and 25 times of that with  
422 1000m\*1000m resolution, it increases at an approximate exponential of power 2, not  
423 linearly with the model resolution.

424

425 Parameters of the models with 500m\*500m and 1000m\*1000m resolution are  
426 optimized with PSO algorithm by using the same flood event data, and listed in Table  
427 6. From the results it could be seen that some parameters are significantly different



428 with resolution variation, but some changes little, this implies that the model  
429 parameters are resolution-dependent.

430 Table 6 Optimized parameters with different model spatial resolution

431 Computation times required for parameter optimization are quite different. For the  
432 model with 200m\*200m resolution, the time for parameter optimization is 220 hours,  
433 while that for models with 500m\*500m and 1000m\*1000m resolution are 55 and 12  
434 hours respectively. The times needed for parameter optimization of the model at  
435 200m\*200m resolution is 4 times of that for 500m\*500m resolution model and 18.3  
436 times of that for 1000m\*1000m resolution model respectively. Considering the time  
437 needed for model run, the 200m\*200m model resolution is regarded as appropriate for  
438 LRB.

## 439 **5.2 Model performance vs model resolution**

440 The other 29 flood events are also simulated with the models at 500m\*500m  
441 resolution and 1000m\*1000m resolution. Simulated hydrograph of 5 flood events,  
442 including 2 big, 2 medium and one small ones are shown in Fig. 7.

443 Fig. 7 Simulated results with different model resolutions

444 From the results it could be seen that the simulated hydrological processes with 3  
445 different spatial resolutions are quite different. The result simulated with  
446 1000m\*1000m resolution is not so good, although the flood shapes are simulated well,  
447 but the peak flow are much lower than that of the observation, so the result is not  
448 acceptable, and could not be recommended. The result simulated with 500m\*500m  
449 resolution model is a big improvement to that simulated with 1000m\*1000m  
450 resolution model, the flood shapes are more similar to the observation, and the peak  
451 flow is also get closer to the observation, and could be recommended for flood  
452 forecasting if the spatial resolution could not be much finer. The result simulated with  
453 200m\*200m resolution model is a further improvement to that simulated with  
454 500m\*500m resolution model, the flood shapes fits the observation much better, and  
455 the peak flows are also much closer to the observation also, it is the good simulation





456 results and could be recommended for flood forecasting of LRB. The results are good  
457 enough that there is no need to further explore the finer model resolution.

## 458 **6 Conclusions**

459 By employing Liuxihe Model, a physically based distributed hydrological model, this  
460 study sets up a distributed hydrological model for the flood forecasting of Liujiang  
461 River Basin in southern China that could be regarded as a large watershed. Terrain  
462 data including DEM, soil type and land use type are downloaded from the website  
463 freely, and the model structure with a high resolution of 200m\*200m grid cell is set  
464 up, which divides the whole watershed into 1469900 grid cells that is further divided  
465 into 1463204 hill slope cells and 6696 river cells. The initial model parameters are  
466 derived from the terrain property data, and then optimized by using the PSO algorithm  
467 with one observed flood event, which improves the model performance largely. 29  
468 observed flood events are simulated by using the model with optimized parameters,  
469 the results are analyzed, and the model scaling effects are studied. Based on these  
470 studies, following conclusions are suggested.

471

472 1. In Liuxihe Model, the river channels are divided into virtual channel sections, and  
473 the cross section shapes are assumed to be trapezoid and the size is the same within  
474 the virtual channel section. The size of the virtual channel section is simplified to  
475 three indices, including bottom width, side slope and bottom slope, those are  
476 estimated by using remote sensing imageries. This method not only makes the  
477 distributed model application practical, but also simplifies the river channel routing  
478 method. This significantly increases the model computation efficiency, and makes it  
479 could be used in larger watersheds. Results in this study shows the model setting up  
480 with this method has a reasonable performance, i.e., this simplification has not  
481 sacrificed the model's flood simulation accuracy significantly, so this simplification  
482 could be used in large watershed distributed hydrological modelling, including  
483 Liuxihe model and other models.

484



485 2. Uncertainty exists for physically derived model parameters. Parameter optimization  
486 could reduce parameter uncertainty, and is highly recommended to do so when there  
487 is some observed hydrological data. In this study, the simulated hydrograph with  
488 optimized model parameters is more fitting the observed hydrograph in shape than  
489 that simulated with initial model parameters, the 5 evaluation indices are improved  
490 also. The average increases of Nash–Sutcliffe coefficient, correlation coefficient and  
491 water balance coefficient are 0.18, 0.21 and 0.09 respectively, the average decreases  
492 of the peak flow error and process relative error are 24% and 15% respectively, this  
493 implies that the model performance is improved significantly with parameter  
494 optimization.

495

496 3. Computation time needed for running a distributed hydrological model increases  
497 exponentially at an approximate power of 2, not linearly with the increasing of model  
498 spatial resolution. In this study, the computation time required for parameter  
499 optimization for the model with 200m\*200m resolution is 220 hours, that is 4 times of  
500 that of the model at 500m\*500m and 18.3 times of that of the model at 1000m\*1000m  
501 resolution respectively. Based on the Liuxihe Model cloud system implemented on the  
502 high performance supercomputer, the 200m\*200m model resolution is the highest  
503 resolution that could be fulfilled in modeling Liujiang River Basin flooding with  
504 Liuxihe Model considering the computation cost. This also means that if the user  
505 could pay high computation cost, then larger watershed could also be modelled with  
506 Liuxihe Model by implemented the Liuxihe Model cloud system on a much more  
507 advanced high performance supercomputer, this could be easily done nowadays if the  
508 user thinks this investment is a worth doing.

509

510 4. In forecasting watershed flood by using distributed hydrological model, minimum  
511 model spatial resolution needs to be maintained to keeping the model an acceptable  
512 performance. Usually if the model spatial resolution increases, i.e., the grid cell gets  
513 smaller, the model performance is better, but this will increase the run time



514 significantly, so there is a threshold model spatial resolution to keep the model  
515 performance reasonable while keep the model run at the least time. In this study, the  
516 threshold model spatial resolution is at 500m\*500m grid cell, but the resolution at  
517 200m\*200m grid cell is recommended by trading-off between the computation cost  
518 and the model performance. This conclusion may be different in different watersheds  
519 for Liuxihe Model, or even different in the same watershed for different models.

520

521 5. Terrain data downloaded freely from the website derived the river channel system  
522 that is very similar to the natural river channel system after it is rescaled from its  
523 original spatial resolution of 90m\*90m to 200m\*200m, 500m\*500m and  
524 1000m\*1000m, but the higher resolution DEM describes the river channel more in  
525 details. This means that the freely downloaded DEM could be used to set up the  
526 Liuxihe Model for Liujiang River Basin flood forecasting.

527

528 **Acknowledgements:** This study is supported by the Special Research Grant for the  
529 Water Resources Industry (funding no. 201301070), the National Science Foundation  
530 of China (funding no. 50479033), and the Basic Research Grant for Universities of  
531 the Ministry of Education of China (funding no. 13lgjc01).

532

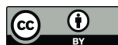

533 **Figures**

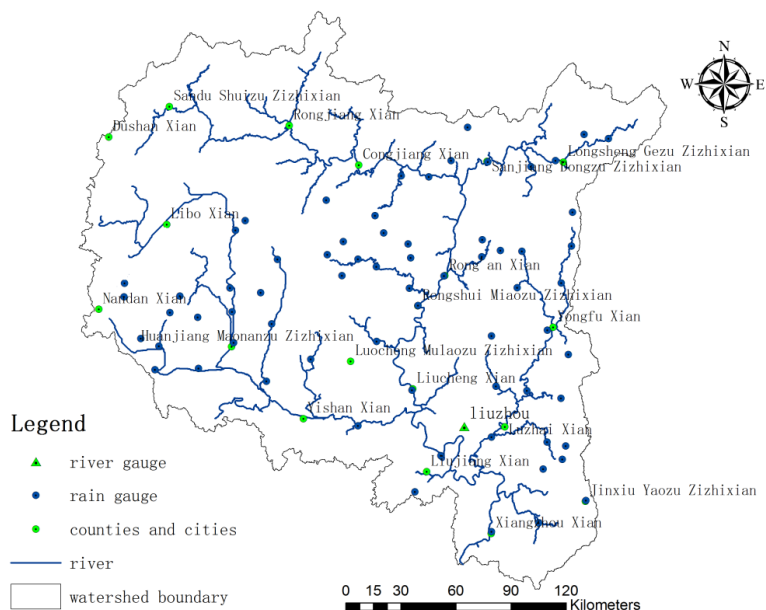

534

535

Fig. 1 sketch map of Liujiang River Basin

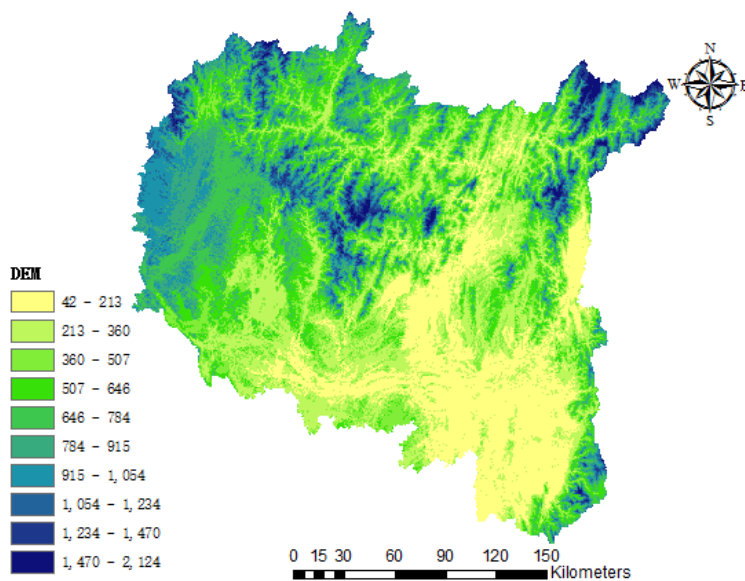

536

537

(a) DEM

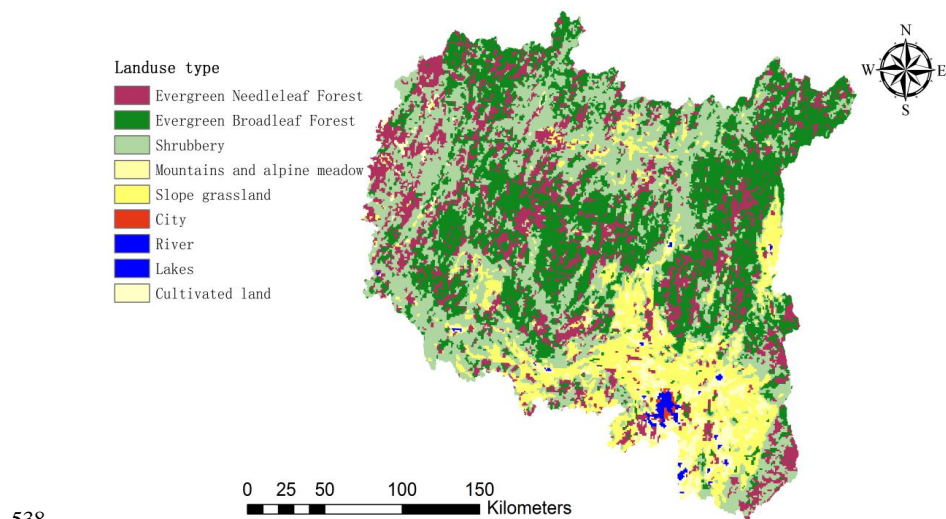

539 (b) land use

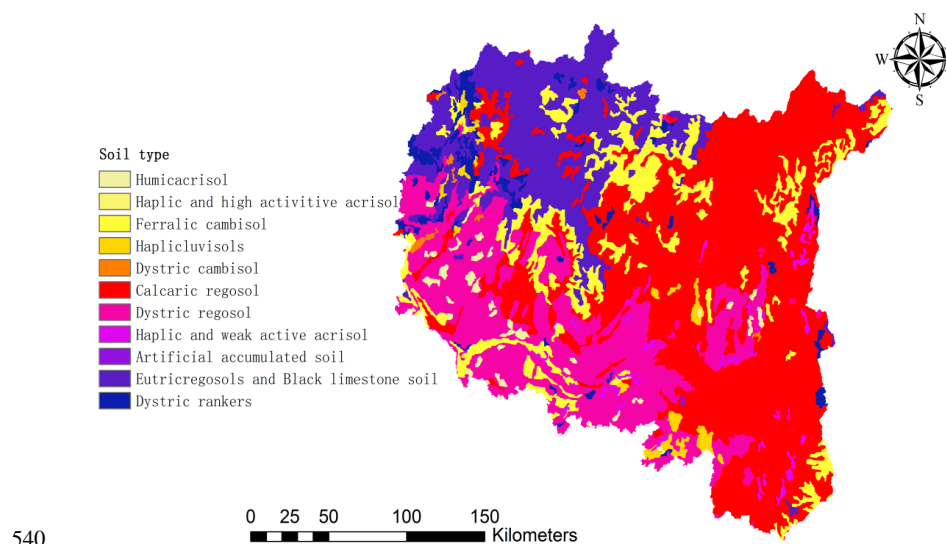

541 (c) soil type

542 Fig. 2 Terrain properties of LRB

543

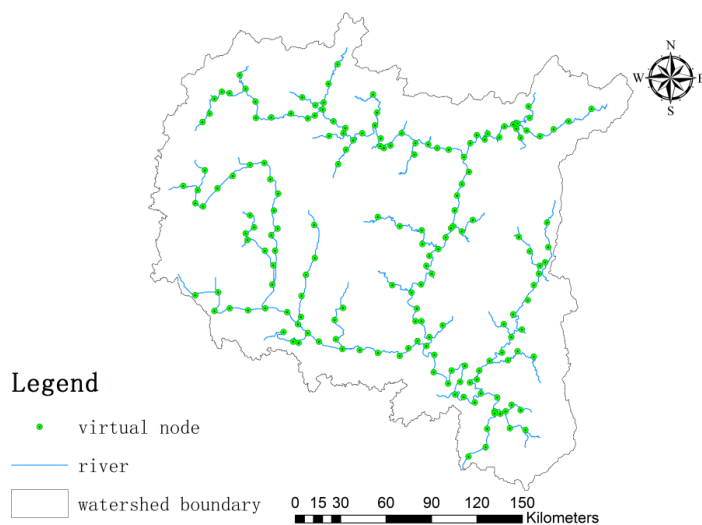

544

545

Fig. 3 Liuxihe Model structure set up for LRB (200m×200m resolution)

546

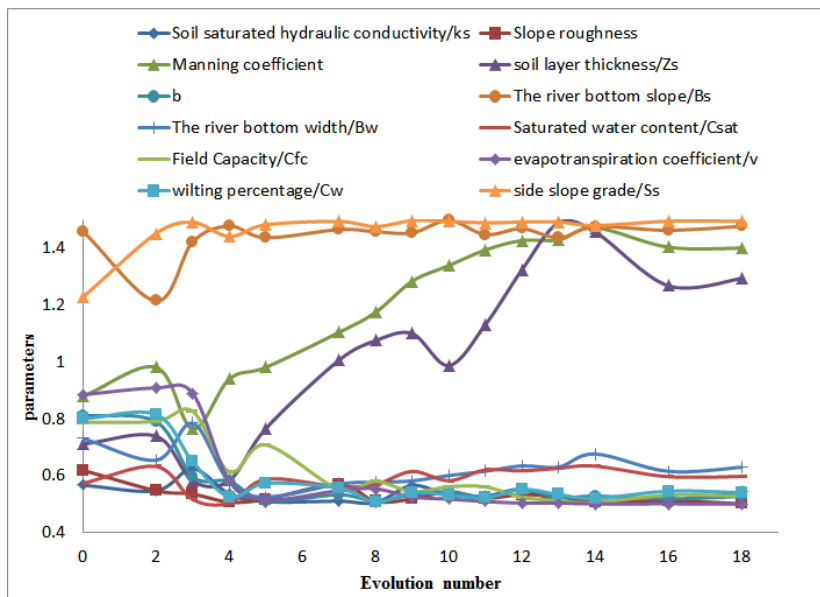

547

548

549

550

551

(a) Parameter evolution process

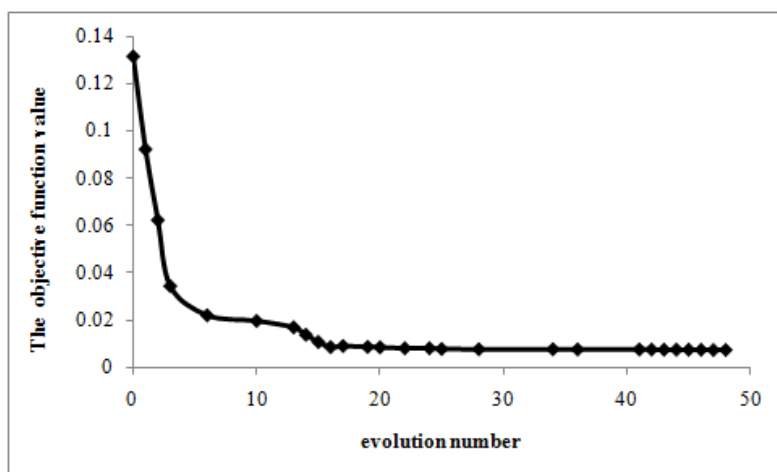

552  
553  
554  
555

(b) Changing curve of objective function

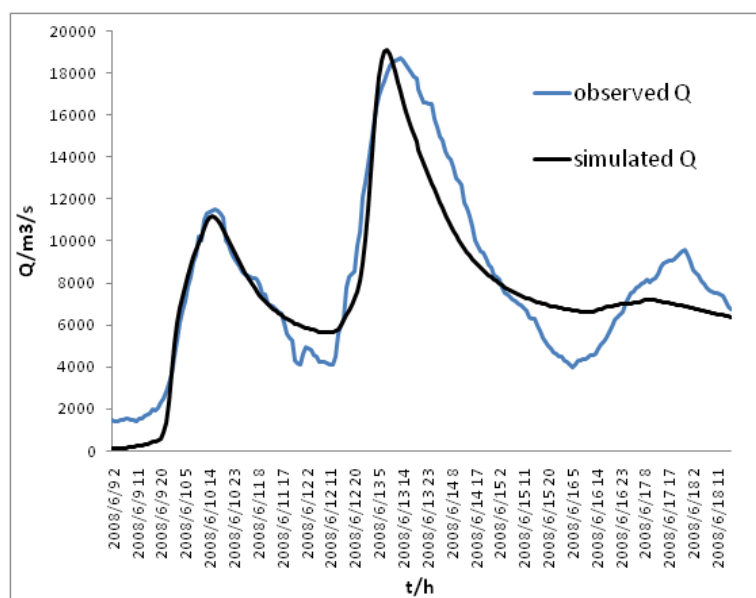

556  
557  
558  
559

(c) Simulated flood process

Fig. 4 Parameter optimization results of Liuxihe Model for LRB with PSO algorithm



560  
561

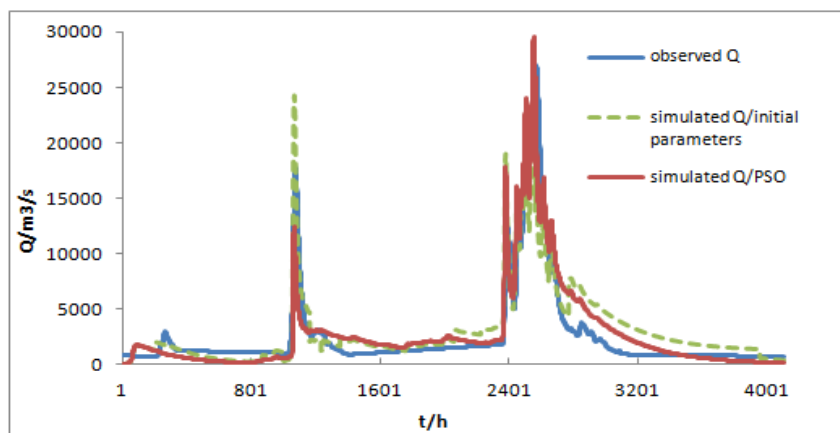

(a) flood event 1988051620

562  
563

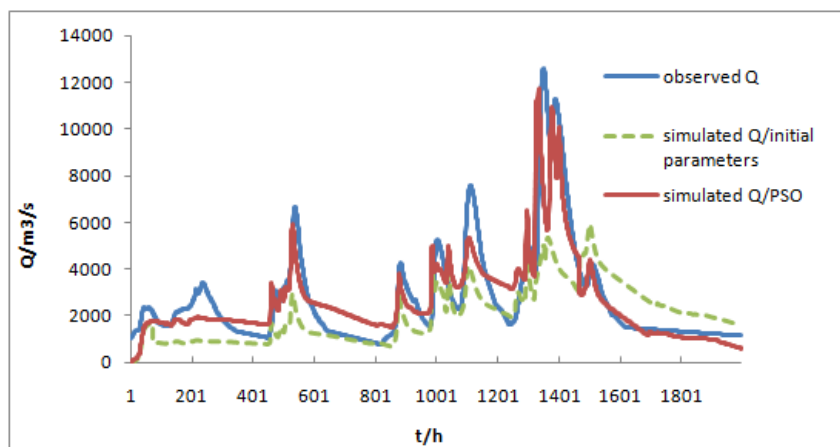

(b) flood event 1982042116

564  
565

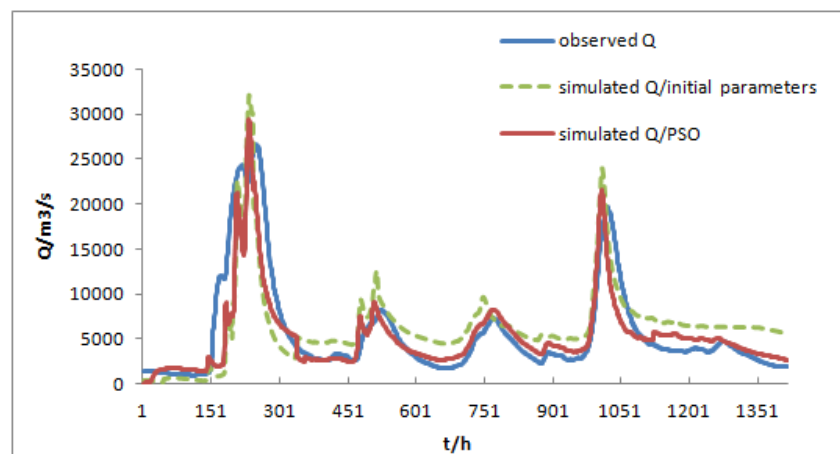

(c) flood event 1994060700



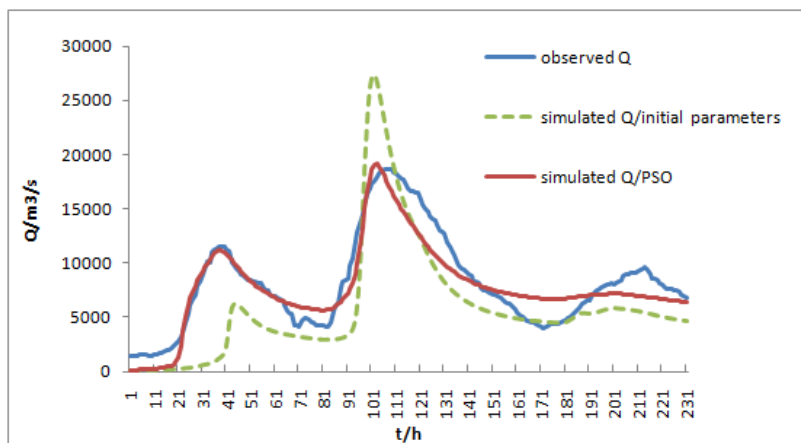

566

567

(d) flood event 2008060902

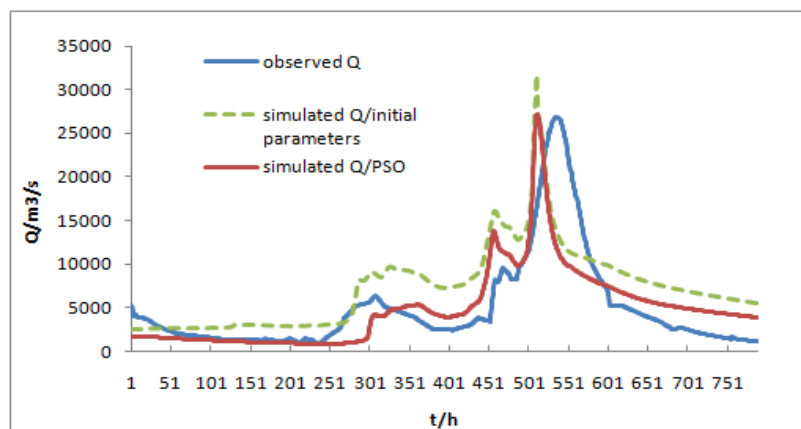

568

569

(e) flood event 200906090800

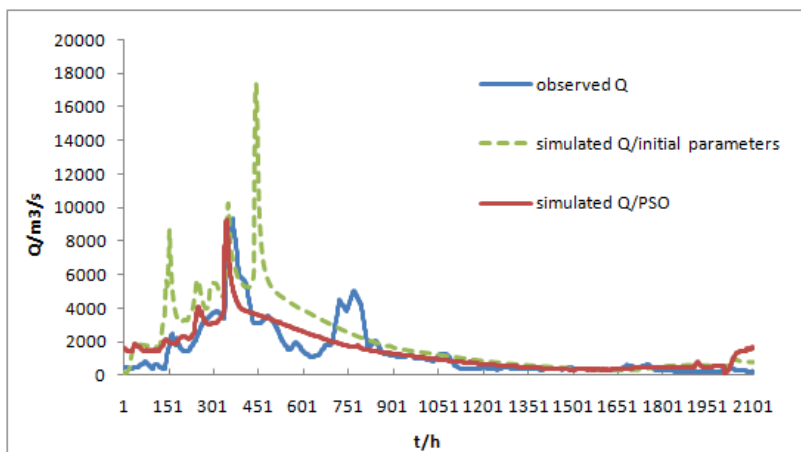

570

571

(f) flood event 201106010900

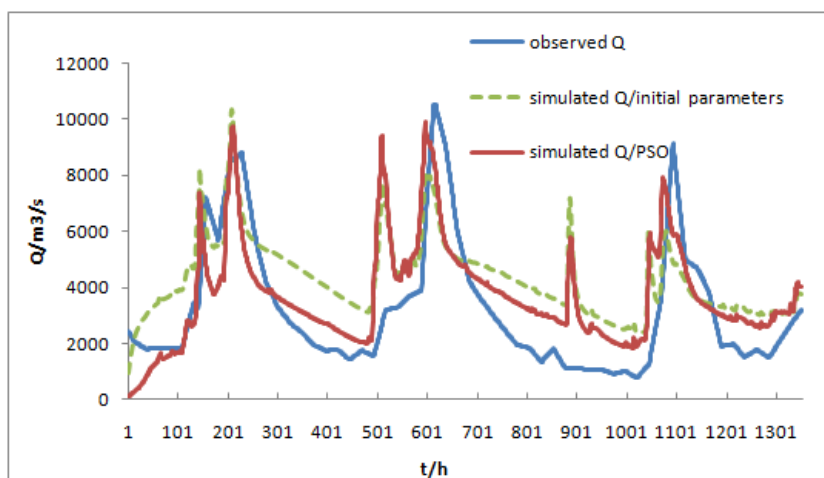

572

573

(g) flood event 201206022000

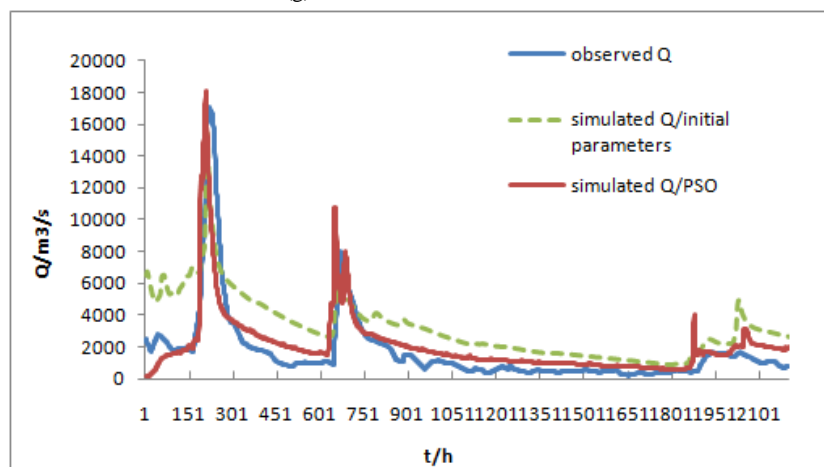

574

575

576

(h) flood event 201306011400

Fig. 5 Simulated flood events by Liuxihe Model with optimized parameters

577

578

579

580

581

582

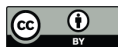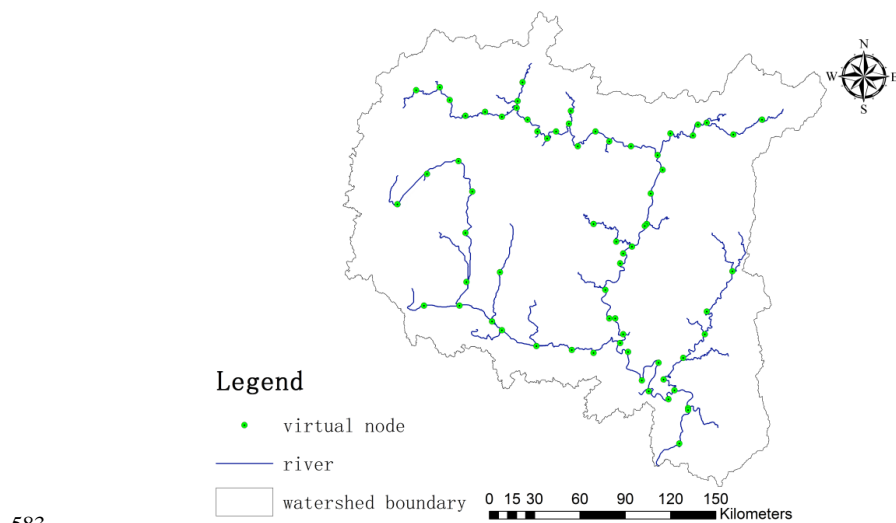

584 (a) 500m×500m resolution

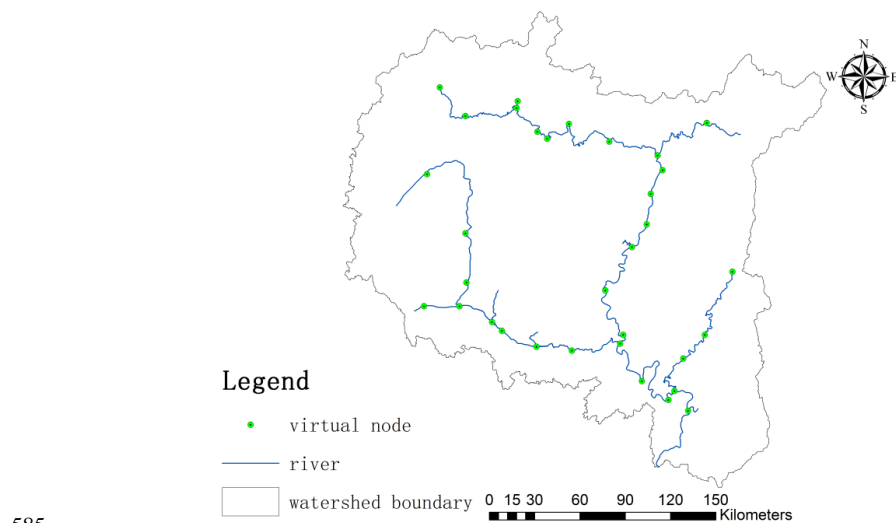

586 (b) 1000m×1000m resolution

587 Fig. 6 Liuxihe Model structure set up for LRB with different resolution

588

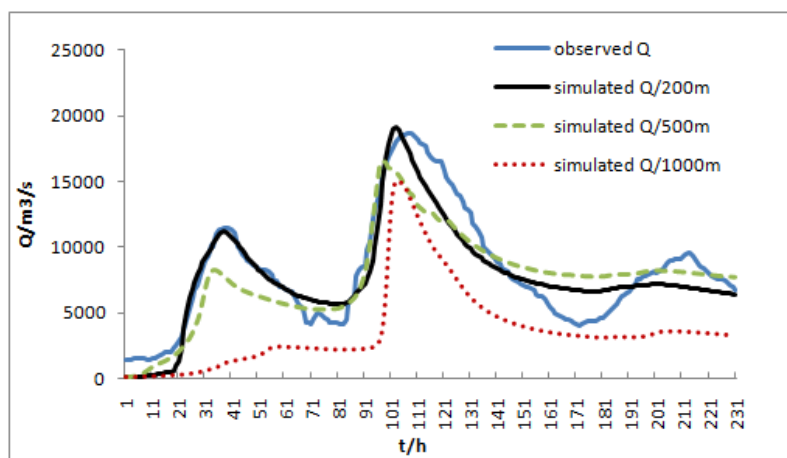

589  
 590

(a) flood event 2008060902

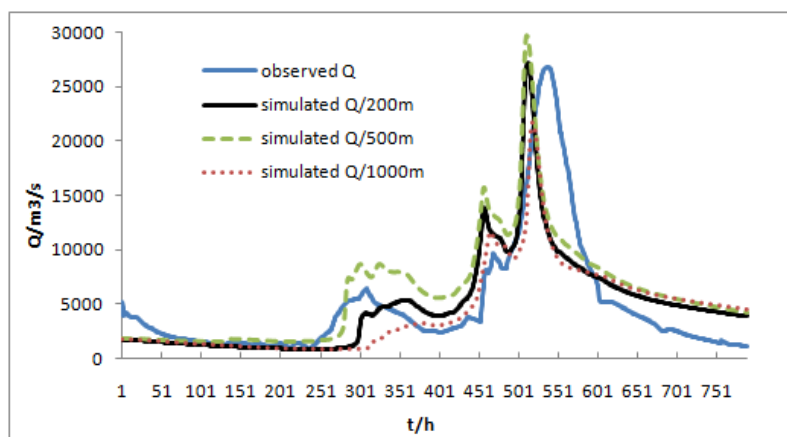

591  
 592

(b) flood event 2009060908

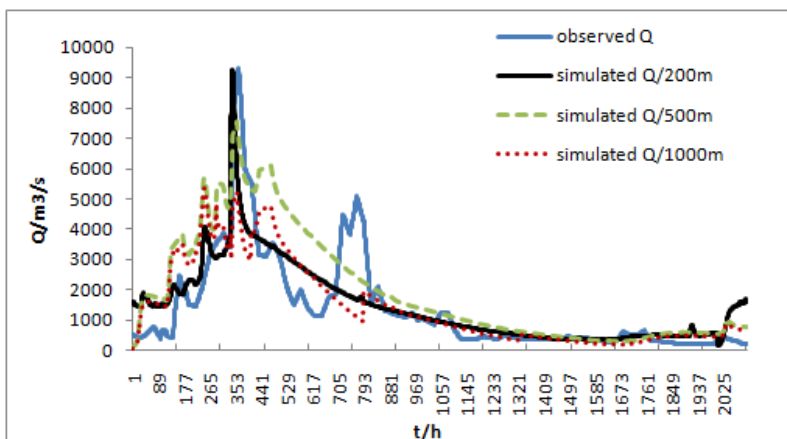

593  
 594

(c) flood event 2011060109

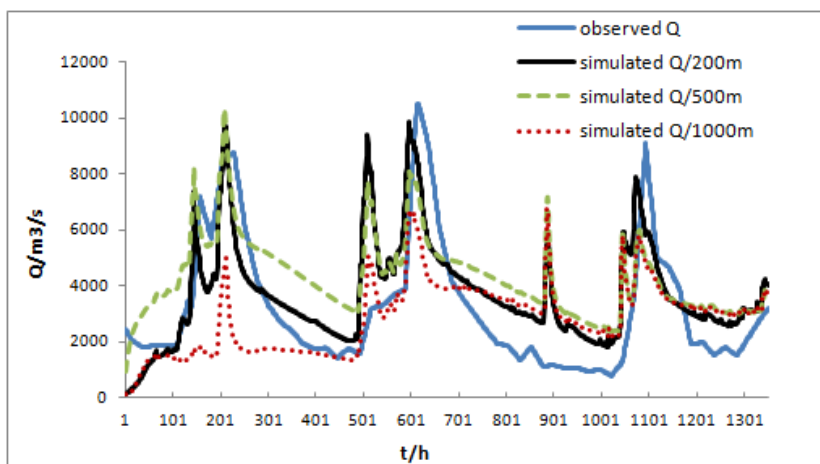

595  
596

(d) flood event 2012060220

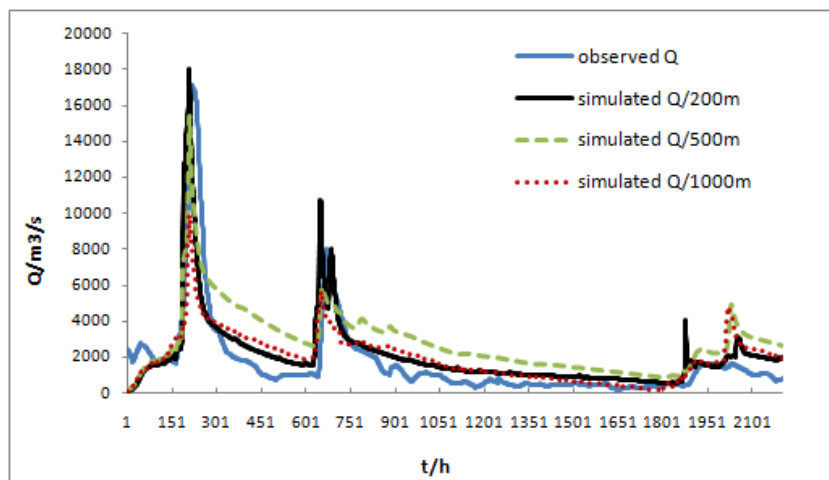

597  
598

(e) flood event 2013060114

Fig. 7 Simulated results with different model resolutions

599  
600  
601  
602  
603  
604  
605

606 **Tables**

607

608

Table1 Brief information of flood events in LRB

| <i>No.</i> | <i>Floods No.</i> | <i>Start time</i><br>( <i>yyyymmddhh</i> ) | <i>End time</i><br>( <i>yyyymmddhh</i> ) | <i>length of</i><br><i>time/h</i> | <i>peak flow</i><br>( <i>m<sup>3</sup>/s</i> ) |
|------------|-------------------|--------------------------------------------|------------------------------------------|-----------------------------------|------------------------------------------------|
| 1          | 1982042116        | 1982042116                                 | 1982110216                               | 4614                              | 12600                                          |
| 2          | 1983020308        | 1983020308                                 | 1983021722                               | 350                               | 7880                                           |
| 3          | 1984021100        | 198402100                                  | 1984040105                               | 1205                              | 12900                                          |
| 4          | 1985011900        | 1985011900                                 | 1985021114                               | 544                               | 11400                                          |
| 5          | 1986022300        | 1986022300                                 | 1986042004                               | 1334                              | 12200                                          |
| 6          | 1987050100        | 1987050100                                 | 1987071700                               | 1848                              | 10800                                          |
| 7          | 1988070620        | 1988070620                                 | 1988100605                               | 2915                              | 27000                                          |
| 8          | 1989042600        | 1989042600                                 | 1989081009                               | 2499                              | 7500                                           |
| 9          | 1990050100        | 1990001000                                 | 1990072306                               | 2006                              | 11400                                          |
| 10         | 1991053118        | 1991053118                                 | 1991062806                               | 686                               | 14300                                          |
| 11         | 1992042900        | 1992042900                                 | 1992072107                               | 1977                              | 18100                                          |
| 12         | 1993060900        | 1993060900                                 | 1993082408                               | 1818                              | 21200                                          |
| 13         | 1994060700        | 1994060700                                 | 1994080706                               | 1416                              | 26500                                          |
| 14         | 1995052100        | 1995052100                                 | 1995071506                               | 1296                              | 17300                                          |
| 15         | 1996060600        | 1996060600                                 | 1996081808                               | 1728                              | 33700                                          |
| 16         | 1997060400        | 1997060400                                 | 1997062406                               | 476                               | 13600                                          |
| 17         | 1998051600        | 1998051600                                 | 1998090100                               | 2520                              | 19600                                          |
| 18         | 1990050100        | 1999050100                                 | 1999080404                               | 1134                              | 17800                                          |
| 19         | 2000052100        | 2000052100                                 | 2000061809                               | 659                               | 24100                                          |
| 20         | 2001051500        | 2001051500                                 | 2001062300                               | 910                               | 14200                                          |
| 21         | 2002042600        | 2002042600                                 | 2002081000                               | 2520                              | 17900                                          |
| 22         | 2003060600        | 2003060600                                 | 2003072103                               | 843                               | 11600                                          |
| 23         | 2004070300        | 200407000                                  | 2004081508                               | 998                               | 23700                                          |
| 24         | 2005061400        | 2005061400                                 | 2005070702                               | 552                               | 16400                                          |
| 25         | 2006060400        | 2006060400                                 | 2006071000                               | 870                               | 13200                                          |
| 26         | 2008060900        | 2008060900                                 | 2008061908                               | 238                               | 18700                                          |
| 27         | 2009060908        | 2009060908                                 | 2009071208                               | 788                               | 26800                                          |
| 28         | 2011061090        | 2011061009                                 | 2011090104                               | 2004                              | 9153                                           |
| 29         | 2012060220        | 2012060220                                 | 2012080101                               | 1351                              | 10500                                          |
| 30         | 2013060114        | 2013060114                                 | 2013090114                               | 2200                              | 17100                                          |

609

610

611

612



613  
 614  
 615

Table 2 The initial values of land use/cover related parameters

| <i>Land use/cover</i>        | <i>evaporation coefficient</i> | <i>roughness coefficient</i> |
|------------------------------|--------------------------------|------------------------------|
| Evergreen needle leaf forest | 0.7                            | 0.4                          |
| Evergreen broadleaf forest   | 0.7                            | 0.6                          |
| Shrubbery                    | 0.7                            | 0.4                          |
| Mountains and alpine meadow  | 0.7                            | 0.2                          |
| Slope grassland              | 0.7                            | 0.3                          |
| City                         | 0.7                            | 0.05                         |
| Cultivated land              | 0.7                            | 0.35                         |

616  
 617  
 618  
 619  
 620  
 621  
 622

Table 3 The initial values of soil related parameters

| <i>Soil Type</i>                   | <i>soil thickness</i> | <i>water content at saturation condition</i> | <i>water content at field condition</i> | <i>hydraulic conductivity at saturation condition</i> |
|------------------------------------|-----------------------|----------------------------------------------|-----------------------------------------|-------------------------------------------------------|
| Humicacrisol                       | 800                   | 0.65                                         | 0.32                                    | 3.5                                                   |
| Haplic and high active acrisol     | 900                   | 0.57                                         | 0.43                                    | 4.2                                                   |
| Ferralic cambisol                  | 850                   | 0.63                                         | 0.38                                    | 20.5                                                  |
| Haplicluvisols                     | 980                   | 0.46                                         | 0.15                                    | 2.6                                                   |
| Dystric cambisol                   | 950                   | 0.55                                         | 0.41                                    | 14                                                    |
| Calcaric regosol                   | 1100                  | 0.62                                         | 0.24                                    | 5.6                                                   |
| Dystric regosol                    | 840                   | 0.45                                         | 0.27                                    | 12.5                                                  |
| Haplic and weak active acrisol     | 1050                  | 0.58                                         | 0.16                                    | 4.6                                                   |
| Artificial accumulated soil        | 1000                  | 0.63                                         | 0.34                                    | 5.5                                                   |
| Eutricregosols and Black limestone | 550                   | 0.75                                         | 0.27                                    | 3.5                                                   |
| Dystric rankers                    | 380                   | 0.78                                         | 0.36                                    | 8                                                     |

623  
 624  
 625  
 626  
 627  
 628



629

Table 4 Evaluation indices of the simulated flood events

| ID | floods      | parameters | Nash–Sutcliffe coefficient/C | Correlation coefficient/R | Process relative error/P | Peak flow relative error/E | Water balance coefficient/W |
|----|-------------|------------|------------------------------|---------------------------|--------------------------|----------------------------|-----------------------------|
| 1  | 1982081219  | initial    | 0.52                         | 0.48                      | 0.56                     | 0.58                       | 0.52                        |
|    |             | optimized  | 0.84                         | 0.75                      | 0.30                     | 0.01                       | 0.83                        |
| 2  | 1983020308  | initial    | 0.60                         | 0.55                      | 0.45                     | 0.26                       | 0.65                        |
|    |             | optimized  | 0.82                         | 0.84                      | 0.21                     | 0.04                       | 0.89                        |
| 3  | 1984010100  | initial    | 0.62                         | 0.71                      | 0.38                     | 0.32                       | 0.75                        |
|    |             | optimized  | 0.75                         | 0.89                      | 0.26                     | 0.14                       | 0.96                        |
| 4  | 1985010100  | initial    | 0.58                         | 0.57                      | 0.35                     | 0.33                       | 0.85                        |
|    |             | optimized  | 0.73                         | 0.87                      | 0.17                     | 0.01                       | 1.05                        |
| 5  | 1986010100  | initial    | 0.65                         | 0.62                      | 0.38                     | 0.25                       | 0.62                        |
|    |             | optimized  | 0.83                         | 0.85                      | 0.23                     | 0.04                       | 0.94                        |
| 6  | 1987050100  | initial    | 0.76                         | 0.45                      | 0.35                     | 0.36                       | 0.58                        |
|    |             | optimized  | 0.93                         | 0.76                      | 0.10                     | 0.05                       | 1.01                        |
| 7  | 19880516200 | initial    | 0.54                         | 0.58                      | 0.26                     | 0.42                       | 0.82                        |
|    |             | optimized  | 0.84                         | 0.80                      | 0.15                     | 0.04                       | 0.90                        |
| 8  | 1989042600  | initial    | 0.52                         | 0.55                      | 0.55                     | 0.25                       | 0.62                        |
|    |             | optimized  | 0.64                         | 0.74                      | 0.39                     | 0.02                       | 0.88                        |
| 9  | 1990050100  | initial    | 0.55                         | 0.64                      | 0.42                     | 0.23                       | 0.55                        |
|    |             | optimized  | 0.85                         | 0.87                      | 0.14                     | 0.03                       | 0.85                        |
| 10 | 1991053118  | initial    | 0.63                         | 0.62                      | 0.40                     | 0.18                       | 0.68                        |
|    |             | optimized  | 0.80                         | 0.76                      | 0.25                     | 0.04                       | 0.95                        |
| 11 | 1992042900  | initial    | 0.48                         | 0.59                      | 0.35                     | 0.34                       | 0.65                        |
|    |             | optimized  | 0.66                         | 0.84                      | 0.20                     | 0.11                       | 0.89                        |
| 12 | 1993060900  | initial    | 0.75                         | 0.65                      | 0.38                     | 0.28                       | 0.84                        |
|    |             | optimized  | 0.91                         | 0.89                      | 0.24                     | 0.09                       | 1.05                        |
| 13 | 1994060700  | initial    | 0.78                         | 0.64                      | 0.32                     | 0.26                       | 1.25                        |
|    |             | optimized  | 0.93                         | 0.85                      | 0.14                     | 0.04                       | 0.85                        |
| 14 | 1995052100  | initial    | 0.68                         | 0.48                      | 0.42                     | 0.35                       | 0.65                        |
|    |             | optimized  | 0.82                         | 0.70                      | 0.20                     | 0.01                       | 0.81                        |
| 15 | 1996060600  | initial    | 0.74                         | 0.65                      | 0.25                     | 0.23                       | 0.54                        |
|    |             | optimized  | 0.90                         | 0.93                      | 0.18                     | 0.02                       | 0.86                        |
| 16 | 1997060400  | initial    | 0.65                         | 0.51                      | 0.23                     | 0.26                       | 0.65                        |
|    |             | optimized  | 0.84                         | 0.87                      | 0.13                     | 0.06                       | 0.95                        |
| 17 | 1998051600  | initial    | 0.57                         | 0.62                      | 0.35                     | 0.18                       | 0.68                        |
|    |             | optimized  | 0.83                         | 0.85                      | 0.30                     | 0.01                       | 1.05                        |
| 18 | 1999061700  | initial    | 0.48                         | 0.59                      | 0.33                     | 0.15                       | 0.55                        |
|    |             | optimized  | 0.60                         | 0.83                      | 0.15                     | 0.05                       | 0.80                        |
| 19 | 2000052100  | initial    | 0.67                         | 0.62                      | 0.45                     | 0.25                       | 0.58                        |
|    |             | optimized  | 0.79                         | 0.89                      | 0.26                     | 0.06                       | 0.83                        |
| 20 | 2001051500  | initial    | 0.62                         | 0.56                      | 0.32                     | 0.22                       | 0.68                        |





|         |            |           |      |      |      |      |      |
|---------|------------|-----------|------|------|------|------|------|
|         |            | optimized | 0.80 | 0.82 | 0.25 | 0.07 | 0.82 |
| 21      | 2002042600 | initial   | 0.68 | 0.65 | 0.38 | 0.18 | 0.57 |
|         |            | optimized | 0.86 | 0.90 | 0.24 | 0.02 | 0.87 |
| 22      | 2003060600 | initial   | 0.75 | 0.55 | 0.25 | 0.26 | 0.55 |
|         |            | optimized | 0.92 | 0.85 | 0.14 | 0.04 | 0.76 |
| 23      | 2004070300 | initial   | 0.58 | 0.68 | 0.38 | 0.27 | 0.68 |
|         |            | optimized | 0.78 | 0.82 | 0.23 | 0.08 | 0.85 |
| 24      | 2005061400 | initial   | 0.65 | 0.62 | 0.52 | 0.32 | 0.65 |
|         |            | optimized | 0.76 | 0.76 | 0.35 | 0.06 | 0.74 |
| 25      | 2006060400 | initial   | 0.68 | 0.72 | 0.62 | 0.35 | 0.53 |
|         |            | optimized | 0.82 | 0.83 | 0.30 | 0.10 | 0.86 |
| 26      | 2009060908 | initial   | 0.75 | 0.78 | 0.25 | 0.23 | 1.22 |
|         |            | optimized | 0.95 | 0.92 | 0.17 | 0.04 | 0.09 |
| 27      | 2011010100 | initial   | 0.66 | 0.75 | 0.35 | 0.55 | 1.66 |
|         |            | optimized | 0.80 | 0.84 | 0.26 | 0.03 | 1.02 |
| 28      | 2012010100 | initial   | 0.63 | 0.68 | 0.34 | 0.22 | 1.42 |
|         |            | optimized | 0.82 | 0.79 | 0.20 | 0.05 | 0.80 |
| 29      | 2013010100 | initial   | 0.78 | 0.65 | 0.31 | 0.32 | 1.35 |
|         |            | optimized | 0.95 | 0.82 | 0.20 | 0.06 | 0.92 |
| average |            | initial   | 0.64 | 0.62 | 0.37 | 0.29 | 0.78 |
|         |            | optimized | 0.82 | 0.83 | 0.22 | 0.05 | 0.87 |

630

631

632

633 Table 5 Grid cell numbers with different model spatial resolution

| <i>model resolution</i> | <i>Number of grid cells</i> | <i>Number of hill slope cells</i> | <i>Number of river cells</i> |
|-------------------------|-----------------------------|-----------------------------------|------------------------------|
| 200m*200m               | 1469900                     | 1463204                           | 6696                         |
| 500m*500m               | 235184                      | 234113                            | 1071                         |
| 1000m*1000m             | 58796                       | 58528                             | 268                          |

634

635

636

637



638 Table 6 Optimized parameters with different model spatial resolution

|                |                                                               |                                          |                                |                                            |                                 |                                         |
|----------------|---------------------------------------------------------------|------------------------------------------|--------------------------------|--------------------------------------------|---------------------------------|-----------------------------------------|
| Resoluti<br>on | Soil<br>saturated<br>hydraulic<br>conductivit<br>y/ $k_{s_1}$ | Slope<br>roughnes<br>s                   | Manning<br>coefficien<br>t     | Soil layer<br>thickness/ $Z_{s_1}$         | b                               | The river<br>bottom<br>slope/ $B_{s_1}$ |
|                | 1.33                                                          | 0.66                                     | 1.19                           | 1.42                                       | 0.67                            | 0.75                                    |
| 200m           | The river<br>bottom<br>width/ $B_{w_1}$                       | Saturated<br>water<br>content/ $C_{sat}$ | Field<br>Capacity/<br>$C_{fc}$ | Evapotranspir<br>ation<br>coefficient/ $v$ | Wilting<br>percentage/<br>$C_w$ | Side slope grad<br>e/ $S_s$             |
|                | 1.24                                                          | 1.11                                     | 1.2                            | 0.94                                       | 0.68                            | 1.42                                    |
| 500m           | Soil<br>saturated<br>hydraulic<br>conductivit<br>y/ $k_{s_1}$ | Slope<br>roughnes<br>s                   | Manning<br>coefficien<br>t     | Soil layer<br>thickness/ $Z_{s_1}$         | b                               | The river<br>bottom<br>slope/ $B_{s_1}$ |
|                | 0.67                                                          | 1.47                                     | 1.49                           | 1.37                                       | 1.5                             | 0.51                                    |
| 1000m          | The river<br>bottom<br>width/ $B_{w_1}$                       | Saturated<br>water<br>content/ $C_{sat}$ | Field<br>Capacity/<br>$C_{fc}$ | Evapotranspir<br>ation<br>coefficient/ $v$ | Wilting<br>percentage/<br>$C_w$ | Side slope grad<br>e/ $S_s$             |
|                | 0.91                                                          | 1.16                                     | 1.41                           | 1.37                                       | 1.37                            | 0.5                                     |
| 1000m          | Soil<br>saturated<br>hydraulic<br>conductivit<br>y/ $k_{s_1}$ | Slope<br>roughnes<br>s                   | Manning<br>coefficien<br>t     | Soil layer<br>thickness/ $Z_{s_1}$         | b                               | The river<br>bottom<br>slope/ $B_{s_1}$ |
|                | 0.5                                                           | 1.43                                     | 1.17                           | 1.11                                       | 1.47                            | 0.57                                    |
| 1000m          | The river<br>bottom<br>width/ $B_{w_1}$                       | Saturated<br>water<br>content/ $C_{sat}$ | Field<br>Capacity/<br>$C_{fc}$ | Evapotranspir<br>ation<br>coefficient/ $v$ | Wilting<br>percentage/<br>$C_w$ | Side slope grad<br>e/ $S_s$             |
|                | 1.1                                                           | 0.76                                     | 0.53                           | 0.6                                        | 1.5                             | 0.54                                    |

639

640

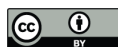641 **References**

- 642 [1] Abbott, M.B. et al.: An Introduction to the European Hydrologic System-System Hydrologue European,  
643 'SHE', a: History and Philosophy of a Physically-based, Distributed Modelling System, Journal of  
644 Hydrology, 87, 45-59, 1986.
- 645 [2] Abbott, M.B. et al.: An Introduction to the European Hydrologic System-System Hydrologue European,  
646 'SHE', b: Structure of a Physically based, distributed modeling System, Journal of Hydrology, 87, 61-77,  
647 1986.
- 648 [3] Ambrose, B., Beven, K., and Freer, J.: Toward a generalization of the TOPMODEL concepts: Topographic  
649 indices of hydrologic similarity, Water Resour. Res., 32, 2135-2145, 1996.
- 650 [4] Anderson, A. N., McBratney, A. B., and FitzPatrick, K. E. A soil mass, surface and spectral fractal dimensions  
651 estimated from thin section photographs. Soil Sci. Soc. Am. J., 60, 962-969, 1996.
- 652 [5] Arya, L.M., and J.F. Paris. 1981. A physioempirical model to predict the soil moisture characteristic from  
653 particle-size distribution and bulk density data. Soil Sci. Soc. Am. J. 45, 1023-1030.
- 654 [6] Bartholmes, J.C., Thielen, J., Ramos, M.H., Gentilini, S., 2009. The european flood alert system EFAS e part  
655 2: statistical skill assessment of probabilistic and deterministic operational forecasts. Hydrol. Earth Syst. Sci.  
656 13 (2), 141e153.
- 657 [7] Burnash, R. J. C., 1995. "The NWS river forecast system-catchment modeling." Computer models of  
658 watershed hydrology, V. P. Singh, ed., Water Resource Publications, Littleton, Colo., 311-366.
- 659 [8] Catto  n, C  dine, Hilary McMillan, and Stuart Moore. Coupling a high-resolution weather model with a  
660 hydrological model for flood forecasting in New Zealand[J]. Journal of Hydrology (NZ), 2016,55 (1): 1-23.
- 661 [9] Chen, Xiuwan, Analysis on flood disasters in China, 1995. Marine Geology and Quaternary Geology,  
662 15(3):161-168.
- 663 [10] Chen, Huiquan, Mao Shimin. Calculation and Verification of an Universal Water Surface Evaporation  
664 Coefficient Formula[J]. Advances in Water Science, 1995, 6(2):116-120.
- 665 [11] Chen, Yangbo. Liuxihe Model, China Science and Technology Press, September 2009.
- 666 [12] Chen, Yangbo, Ren, Q.W., Huang, F.H., Xu, H.J., and Cluckie, I.: Liuxihe Model and its modeling to river  
667 basin flood, Journal of Hydrologic Engineering, 16, 33-50, 2011.
- 668 [13] Chen, Yangbo, Yi Dong, Pengcheng Zhang. Study on the method of flood forecasting of small and medium  
669 sized catchment, proceeding of the 2013 annual meeting of the Chinese Society of Hydraulic Engineering,  
670 1001-1008, 2013.
- 671 [14] Chen, Yangbo, Ji Li, Huijun Xu. Improving flood forecasting capability of physically based distributed  
672 hydrological model by parameter optimization. Hydrology & Earth System Sciences, 20, 375-392, 2016.
- 673 [15] Dibike, Y. B., P. Coulibaly. Hydrologic impact of climate change in the Saguenay watershed: comparison of  
674 downscaling methods and hydrologic models[J]. Journal of Hydrology, 2005, 307(1-4): 145-163.
- 675 [16] EEA, 2010. Mapping the Impacts of Natural Hazards and Technological Accidents in Europe: an Overview  
676 of the Last Decade. EEA Technical Report. European Environment Agency, Copenhagen, p. 144.
- 677 [17] Falorni, G., Teles, V., Vivoni, E. R., Bras, R. L., and Amaratunga, K. S.: Analysis and characterization of the  
678 vertical accuracy of digital elevation models from the Shuttle Radar Topography Mission, J. Geophys. Res.  
679 F-Earth Surf., 110, F02005, doi:10.1029/2003JF000113, 2005.
- 680 [18] Freeze, R. A., and Harlan, R.L.: Blueprint for a physically-based, digitally simulated, hydrologic response  
681 model, Journal of Hydrology, 9, 237-258, 1969.
- 682 [19] Grayson, R.B., Moore, I. D., and McMahon, T.A.: Physically based hydrologic modeling: I. A Terrain-based  
683 model for investigative purposes, Water Resources Research, 28, 2639-2658, 1992.
- 684 [20] Guo, Hanqing, Hua Youzhi, Bai Xiumei. Hydrological Effects of Litter on Different Forest Stands and Study  
685 about Surface Roughness Coefficient[J]. Journal of Soil and Water Conservation, 2010, 24(2):179-183
- 686 [21] Jensen, S. K. and J. O. dominggue, 1988, Extracting Topographic Structure from Digital Elevation Data for  
687 Geographic Information System Analysis, Photogrammetric Engineering and Remote Sensing, 54(11)
- 688 [22] Jia, Y., Ni, G., and Kawahara, Y.: Development of WEP model and its application to an urban watershed,  
689 Hydrological Processes, 15, 2175-2194, 2001.
- 690 [23] Julien, P.Y., Saghafian, B., and Ogden, F. L.: Raster-Based Hydrologic Modeling of spatially-Variied Surface  
691 Runoff, Water Resources Bulletin, 31, 523-536, 1995.
- 692 [24] Kauffeldt, A., F. Wetterhall, F. Pappenberger, P. Salamon, J. Thielen. Technical review of large-scale  
693 hydrological models for implementation in operational flood forecasting schemes on continental level[J].  
694 Environmental Modelling & Software, 2016, 75: 68-76.
- 695 [25] Kavvas, M., Chen, Z., Dogrul, C., Yoon, J., Ohara, N., Liang, L., Aksoy, H., Anderson, M., Yoshitani, J.,  
696 Fukami, K., and Matsuura, T. (2004). "Watershed Environmental Hydrology (WEHY) Model Based on  
697 Upscaled Conservation Equations: Hydrologic Module." J. Hydrol. Eng.,  
698 10.1061/(ASCE)1084-0699(2004)9:6(450), 450-464.
- 699 [26] Kouwen, N.: WATFLOOD: A Micro-Computer based Flood Forecasting System based on Real-Time  
700 Weather Radar, Canadian Water Resources Journal, 13, 62-77, 1988.
- 701 [27] Krzmm, R. W. The Federal Role in Natural Disasters. International Symposium on Torrential Rain and  
702 Flood, Oct 5-9, 1992, Huangshan, China.
- 703 [28] Kuniyoshi, T. Japanese Experiences of Combating Against Floods in the past half century. International  
704 Symposium on Torrential Rain and Flood, Oct 5-9, 1992, Huangshan, China.



- 705 [29] Li, Y., C. Wang. Impacts of urbanization on surface runoff of the Dardenne Creek watershed, St. Charles  
706 County, Missouri[J]. *Phys. Geogr.* 2009, 30(6):556-573.
- 707 [30] Li, Yuting, Zhang Jianjun, Ri Hao, et al. Effect of Different Land Use Types on Soil Anti-scourability and  
708 Roughness in Loess Area of Western Shanxi Province[J]. *Journal of Soil and Water Conservation*, 2013,  
709 27(4):1-6.
- 710 [31] Liang, X., Lettenmaier, D.P., Wood, E.F., and Burges, S.J.:A simple hydrologically based model of land  
711 surface water and energy fluxes for general circulation models, *J. Geophys. Res.*, 99,14415-14428,1994.
- 712 [32] Liao, Zhenghong, Yangbo Chen, Xu Huijun, Yan Wanling, Ren Qiwei, Parameter Sensitivity Analysis of the  
713 Liuxihe Model Based on E-FAST Algorithm, *Tropical Geography*, 2012, 32(6):606-612.
- 714 [33] Liao, Zhenghong, Yangbo Chen, Xu Huijun, He Jinxiang, Study of Liuxihe Model for flood forecast of  
715 Tiantoushui Watershed, Yangtze River, 2012, 43(20): 12-16.
- 716 [34] Lohmann, D., Raschke, E., Nijssen, B., Lettenmaier, D. P. (1998). Regional scale hydrology: II. Application  
717 of the VIC-2L model to the Weser River, Germany, *Hydrological Sciences Journal*, 43:1, 143-158.
- 718 [35] Loveland, T. R., Merchant, J. W., Ohlen, D. O., and Brown, J. F.:Development of a Land Cover  
719 Characteristics Data Base for the Conterminous U.S., *Photogram. Eng. Remote Sens.*, 57, 1453-1463, 1991.
- 720 [36] Loveland, T. R., Reed, B. C., Brown, J. F., Ohlen, D. O., Zhu, J., Yang, L., and Merchant, J. W.:  
721 Development of a Global Land Cover Characteristics Database and IGBP DISCover from 1-km AVHRR  
722 Data, *Int. J. Remote Sens.*, 21, 1303-1330, 2000.
- 723 [37] Madsen, H.:Parameter estimation in distributed hydrological catchment modelling using automatic  
724 calibration with multiple objectives, *Advances in Water Resources*, 26,205-216, 2003.
- 725 [38] Olivera, F., B. B. DeFee. Urbanization and its effect on runoff in the Whiteoak Bayou Watershed, Texas[J]. *J.*  
726 *Am. Water Resour. Assoc.* , 2007, 43(1):170-182.
- 727 [39] Ott, B., Uhlenbrook S. Quantifying the impact of land-use changes at the event and seasonal time scale using  
728 a process-oriented catchment model[J]. *Hydrol Earth Syst Sci.* ,2004, 8:62-78.
- 729 [40] Refsgaard, J. C.,1997. "Parameterisation, calibration and validation of distributed hydrological models." *J.*  
730 *Hydrol.*, 198, 69-97.
- 731 [41] Rose, Seth Norman E. Peters. Effects of urbanization on streamflow in the Atlanta area (Georgia, USA): a  
732 comparative hydrological Approach[J]. *Hydrological Processes*, 2001, 15(8):1141-1157.
- 733 [42] Rwetabula, J., F. De Smedt, M. Rebhun. Prediction of runoff and discharge in the Simiyu River (tributary of  
734 Lake Victoria, Tanzania) using the WetSpa model. *Hydrology and Earth System Sciences Discussions*,  
735 *European Geosciences Union*, 2007, 4 (2):881-908.
- 736 [43] Shafii, M. and Smedt, F. De: Multi-objective calibration of a distributed hydrological model (WetSpa) using  
737 a genetic algorithm, *Hydrol. Earth Syst. Sci.*, 13, 2137-2149, 2009.
- 738 [44] Sharma, A. Tiwari, K. N.: A comparative appraisal of hydrological behavior of SRTM DEM at catchment  
739 level, *J. Hydrol.*, 519, 1394-1404, 2014.
- 740 [45] Shen, Shengqiong, Shuanghe, Guze. Conversion Coefficient between Small Evaporation Pan and  
741 Theoretically Calculated Water Surface Evaporation in China[J].*Journal of Nanjing Institute of Meteorology*,  
742 2007, 30(4):561-565.
- 743 [46] Sood, A., Smakhtin, V., 2015. Global hydrological models: a review. *Hydrol. Sci. J.* 60(4), 549e565.  
744 <http://dx.doi.org/10.1080/02626667.2014.950580>.
- 745 [47] Stisen, Simon, Jensen, Karsten H., Inge Sandholt , David I.F. Grimes. A remote sensing driven distributed  
746 hydrological model of the Senegal River basin, *Journal of Hydrology*, 2008(354):131-148.
- 747 [48] Strahler, A. N.Quantitative analysis of watershed Geomorphology, *Transactions of the American Geophysical*  
748 *Union*, 1957, 35(6), 913-920.
- 749 [49] Sugawara, M. \_1995\_. "Tank model." *Computer models of watershed hydrology*, V. P. Singh, ed., *Water*  
750 *Resources Publications*, Littleton, Colo., 165-214.
- 751 [50] Thielen, J., Bartholmes, J., Ramos, M.H., de Roo, A., 2009. The European flood alert system e part 1:  
752 concept and development. *Hydrol. Earth Syst. Sci.* 13 (2), 125-140.
- 753 [51] Thielen, J., Pappenberger, F., Salamon, P., Bogner, K., Burek, P., de Roo, A., 2010. The State of the Art of  
754 Flood Forecasting-Hydrological Ensemble Prediction Systems, p. 145.
- 755 [52] Todini, E., 1996. "The ARNO rainfall-runoff model." *J. Hydrol.*, 175, 339-382.
- 756 [53] Vanrheenen, N. T., A W Wood, R N Palmer, et al. Potential implications of PCM climate change scenarios for  
757 Sacramento-San Joaquin River Basin hydrology and water resources[J]. *Climatic Change*, 2004, 62(1-3):  
758 257-281.
- 759 [54] Vieux, B. E., and Vieux, J. E.:VfloTM: A Real-time Distributed Hydrologic Model[A]. In:Proceedings of the  
760 2nd Federal Interagency Hydrologic Modeling Conference, July 28-August 1, Las Vegas, Nevada. Abstract  
761 and paper on CD-ROM, 2002.
- 762 [55] Vieux, B.E., Moreda, F.G.:Ordered physics-based parameter adjustment of a distributed model. In: Duan, Q.,  
763 Sorooshian, S., Gupta, H.V., Rousseau, A.N., Turcotte, R. (Eds.), *Advances in Calibration of Watershed*  
764 *Models*. *Water Science and Application Series*, vol. 6. American Geophysical Union, pp. 267-281, 2003
- 765 [56] Vieux, B.E., Cui Z., Gaur A.: Evaluation of a physics-based distributed hydrologic model for flood  
766 forecasting, *Journal of Hydrology*, 298, 155-177, 2004.
- 767 [57] Vivoni, E.R., Ivanov, V.Y., Bras, R.L. and Entekhabi, D. 2004. Generation of Triangulated Irregular  
768 Networks based on Hydrological Similarity. *Journal of Hydrologic Engineering*. 9(4): 288-302.
- 769 [58] Wang, Z., Batelaan, O., De Smedt, F.: A distributed model for water and energy transfer between soil, plants  
770 and atmosphere (WetSpa). *Journal of Physics and Chemistry of the Earth* 21, 189-193, 1997.



- 771 [59] Wigmosta, M. S., Vai, L. W., and Lettenmaier, D. P.: A Distributed Hydrology-Vegetation Model for  
772 Complex Terrain, *Water Resources Research*, 30,1665-1669,1994.
- 773 [60] Witold F. Krajewski, Daniel Ceynar, Ibrahim Demir, Radoslaw Goska, Anton Kruger, Carmen Langel,  
774 Ricardo Mantilla, James Niemeier, Felipe Quintero, Bong-Chul Seo, Scott J. Small, Larry J. Weber, and  
775 Nathan C. Young. Real-time Flood Forecasting and Information System for the State of Iowa[J] *Bull.*  
776 *Amer.Meteor.* 2016,Soc. doi:10.1175/BAMS-D-15-00243.1, in press.
- 777 [61] Xu, Huijuna, Yangbo Chen, Zeng Biqu, He Jinxiang, Liao Zhenghong, Application of SCE-UA Algorithm  
778 to Parameter Optimization of Liuxihe Model, *Tropical Geography*, 2012.1, 32(1): 32-37.
- 779 [62] Xu, Huijun, Yangbo Chen, Li Zhouyang, He Jinxiang, Analysis on parameter sensitivity of distributed  
780 hydrological model based on LH-OAT Method, *Yangtze River*, 2012, 43(7): 19-23.
- 781 [63] Yang, D., Herath ,S. and Musiaka, K.:Development of a geomorphologic properties extracted from DEMs  
782 for hydrologic modeling, *Annual journal of Hydraulic Engineering, JSCE*, 47,49-65,1997.
- 783 [64] Zaradny, H. *Groundwater Flow in Saturated and Unsaturated Soil*. Now York:A A BalKema,1993.
- 784 [65] Zhang, Shaohui, Xu Di, Li Yinong, et al. An optimized inverse model used to estimate Kostikov infiltration  
785 parameters and Manning's roughness coefficient based on SGA and SRFR model: I Establishment[J]. *Shuili*  
786 *Xuebao*, 2006, 37(11):1297-1302.
- 787 [66] Zhang, Shaohui, Xu Di, Li Yinong, et al. Optimized inverse model used to estimate Kostikov infiltration  
788 parameters and Manning's roughness coefficient based on SGA and SRFR model: II Application[J]. *Shuili*  
789 *Xuebao*, 2007, 38(4):402-408.
- 790 [67] Zhang, Mengze, Liu Yuanhong, Wang Lingru, et al. Inversion on Channel Roughness for Hydrodynamic  
791 Model by Using Quantum-Behaved Particle Swarm Optimization[J]. *Yellow River*, 2015, 37(2):26-29
- 792 [68] Zhao, R. J.,1977. Flood forecasting method for humid regions of China, East China College of Hydraulic  
793 Engineering, Nanjing, China.
